# Supplementary material for: Comparative Transcriptome Analysis of Sophora japonica (L.) Roots Reveals Key Pathways and Genes in Response to PEG-Induced Drought Stress under Different Nitrogen Conditions
Source: MDPI journal article supplement (doi:10.3390/f12050650), 2021-05-20
Supplement: s1 [file s1]

Archive with 2 entries (2 files):
- supplementary figures.pdf
- supplementary tables.xls
