# Supplementary material for: Comparative Transcriptome Analysis of Sophora japonica (L.) Roots Reveals Key Pathways and Genes in Response to PEG-Induced Drought Stress under Different Nitrogen Conditions
Source: MDPI journal article supplement (doi:10.3390/f12050650), 2021-05-20
Supplement: s1 [file s1 › supplementary tables.xls]

## Sheet: Table S1
Table S1 RNA sample details including quality and concentration measurements
Sample ID	Nitrogena	Treatmentb	Replicate	RINc	28S/18S	OD260/280	OD260/230	RNA conc. (ng/ μL)
NN-1	1	No	1	8.6	4.07	2.15	2.33	908.8
NN-2	1	No	2	7.9	2.9	2.18	1.83	541.6
NN-3	1	No	3	7.7	3.96	2.18	1.71	452.8
LN-1	0	No	1	9.3	3.75	2.14	1.58	707.4
LN-2	0	No	2	9.6	2.55	2.14	1.2	370.6
LN-3	0	No	3	9.5	2.46	2.09	1.96	474
NL-1	1	Yes	1	8.1	3.45	2.18	2.17	669.7
NL-2	1	Yes	2	7.6	3.05	2.08	1.89	452.4
NL-3	1	Yes	3	8.3	3.16	2.14	1.07	282.5
LL-1	0	Yes	1	9.8	3.33	2.15	0.69	152.7
LL-2	0	Yes	2	9.4	2.43	2.08	2.01	463.6
LL-3	0	Yes	3	9.2	2.39	2.18	2.31	714.8
aNitrogen concentration in hydroponic solution
bSample treatment: Yes-with 20% PEG-6000 simulated drought; No-without PEG-6000
cRNA integrity (RIN), as determined by the Agilent Bioanalyzer 2100 system (Agilent Technologies, CA, USA)
NN, normal N supply (1 mM NH4NO3) without drought; NL, normal N supply (1 mM NH4NO3) with drought; LN, N starvation (0 mM NH4NO3) without drought; LL, N starvation (0 mM NH4NO3) with drought.

## Sheet: Table S2
Table S2 Gene accession numbers of Arabidopsis thaliana used in phylogenetic analysis.
Gene Name	accession number
AtNPF1.1 (AtNRT1.12)	Q8LPL2.2
AtNPF1.2 (AtNRT1.11)	Q9M817.1
AtNPF1.3	Q9LYD5.1
AtNPF2.1	Q9M171.1
AtNPF2.2	Q9M174.1
AtNPF2.3	Q9M175.1
AtNPF2.4	Q9M173.1
AtNPF2.5	Q9M172.2
AtNPF2.6	Q9M1E1.1
AtNPF2.7	Q9M1E2.1
AtNPF2.8	Q3E8X3,2
AtNPF2.9 (AtNRT1.9)	Q9M9V7,1
AtNPF2.10	Q944G5.3
AtNPF2.11 (AtNRT1.10)	Q9LV10.1
AtNPF2.12 (AtNRT1.6)	Q9LFX9.2
AtNPF2.13 (AtNRT1.7)	Q8RX77.1
AtNPF2.14	Q9CAR9.1
AtNPF3.1	Q9SX20.1
AtNPF4.1	Q9SLF0.1
AtNPF4.2	Q9SLE8.1
AtNPF4.3 (AtNRT1.14)	Q93VV5.1
AtNPF4.4 (AtNRT1.13)	Q56XQ6.1
AtNPF4.5	Q8VYE4.1
AtNPF4.6 (AtNRT1.2)	Q8H157.1
AtNPF4.7	Q9FM20.2
AtNPF5.1	Q8V2R7.2
AtNPF5.2	Q9FNL7.1
AtNPF5.3	Q9FNL8.1
AtNPF5.4	Q9M1I2.1
AtNPF5.5	O80436.1
AtNPF5.6	POCI03.1
AtNPF5.7	Q9M33.1
AtNPF5.8	Q9LFR1.1
AtNPF5.9	Q9SRI2.1
AtNPF5.10	Q0WP01.1
AtNPF5.11	Q8RX67.1
AtNPF5.12	Q9C7U1.1
AtNPF5.13 (AtNRT1.16)	Q0WSZ6.2
AtNPF5.14 (AtNRT1.15)	Q8VZE2.2
AtNPF5.15	Q9SK99.1
AtNPF5.16	Q9SK96.1
AtNPF6.1	Q9LYR6.1
AtNPF6.2 (AtNRT1.4)	Q9SZY4.1
AtNPF6.3 (AtNRT1.1)	Q05085.1
AtNPF6.4 (AtNRT1.3)	Q9LVE0.1
AtNPF7.1	Q3E9B5.1
AtNPF7.2 (AtNRT1.8)	Q8GXN2.2
AtNPF7.3 (AtNRT1.5)	Q9LQL2.2
AtNPF8.1	Q9M390.1
AtNPF8.2	Q9LFB8.1
AtNPF8.3	P46032.1
AtNPF8.4	Q84WG0.2
AtNPF8.5	Q93Z20.1
AtNRT2.1	O82811.1
AtNRT2.2	Q9LMZ9.1
AtNRT2.3	Q9FJH7.1
AtNRT2.4	Q9FJH8.1
AtNRT2.5	Q9LPV5.1
AtNRT2.6	Q9LXH0.1
AtNRT2.7	Q9LYK2.1
AtNRT3.1	Q9FG55.1
AtAMT1.1	NP_193087.1
AtAMT1.2	Q9ZPJ8.1
AtAMT1.3	Q9SQH9.2
AtAMT1.4	NP_194599.1
AtAMT1.5	NP_189072.1
AtAMT2	NP_181363.1

## Sheet: Table S3
Table S3 The primers used for qRT-PCR.
Gene ID	Forward primer	Reverse primer
c1213028.graph_c1	TTCTCCACATCCGCAGGTCTCTC	AGGTCATTTGAGGGAGGGAGGAAC
c1259182.graph_c0	TGAAGTTGTGTAACGCCTGAAGGG	CAGTGCCTGCACCATCCATTCC
c1238615.graph_c0	TCACGGCGTTGTTTGCTAAGGAG	GCTTCCCACCACCACCCATAAAC
c1244303.graph_c0	GCAGCCCATCCTTGAACCAGAC	AGCCTCCTCGTGTGGACTTGG
c1144214.graph_c0	GAGCATGTTCCAGAGGCATCAGAG	GAGCCCTAAAACACCAGCAAATCG
c1263292.graph_c0	CCCACCACCACCAGGTAGATCC	TGAGGTATGTGCTGAAGCGTTGTG
c1243496.graph_c0	GTTCGCTTTCTCACCCCTCCATG	TTCCTCCACTCTCGGCTCCAAC
c1249069.graph_c1	GTTGGTCCTTCGGTTGGCATCTC	AGCACCAGCACCATTCCAATCAC
c1262840.graph_c1	ACGAGAACATCGCAGTCTTCAACC	CCCAAGCCTACTCAAGCATTCCAG
c1160972.graph_c1	CCCAAAACGGTGGATATGGAGGTG	ACGGTTGTTCGGTATGGCTTGTG
c1247600.graph_c1	ACCCAGCAGTTGTGGAAGAGAATG	GATCCGCCAAGGTGAAGCAGTC
c1238134.graph_c0	CACTGGTCTGGTTGTCCGAGTAAG	TGGCGTGATGACTGTGCTGATTC
c1235220.graph_c0	CTCAATTGGGTGGGTGTGTACTCC	AAGAAGCAAGTCCAACGCCTAACC
c1244467.graph_c2	ATGGCTTCCTCCCTGGCTCTG	CGGTCCTCCTCATCTGAATCTTGC
c1211546.graph_c0	GGCAGTGCGGGTTATAGAACTTGG	TGGATGAGTGGAAGAGGGAGGAAC
Helicase	CTGACAAGATGCGAAGCC	TCAATACCACGAGCCAAA

## Sheet: Table S4
Table S4 Summary of sequences analysis
Sample name	Clean Reads	GC content	Q30	Mapped Reads	Mapped Ratio
NN-1	25719088	0.4513	0.9364	16105159	0.6262
NN-2	29003748	0.4558	0.9211	17077730	0.5888
NN-3	29962130	0.4574	0.9288	18744730	0.6256
LN-1	34609623	0.4535	0.9316	21393100	0.6181
LN-2	31392286	0.4492	0.9307	19258904	0.6135
LN-3	31877628	0.4495	0.9242	20089931	0.6302
NL-1	30765469	0.4487	0.9318	18057804	0.587
NL-2	30485851	0.4593	0.9296	19398640	0.6035
NL-3	28881008	0.448	0.9317	18622565	0.6448
LL-1	28952503	0.4474	0.93	18851332	0.6511
LL-2	31667258	0.4474	0.9347	21249495	0.671
LL-3	30884981	0.4474	0.929	19733557	0.6389
NN, normal N supply (1 mM NH4NO3) without drought; NL, normal N supply (1 mM NH4NO3) with drought; LN, N starvation (0 mM NH4NO3) without drought; LL, N starvation (0 mM NH4NO3) with drought.

## Sheet: Table S5
Table S5 Length distribution of assembled unigenes
Length Range(bp)	Transcript	Unigene
0-300	0	0
300-500	13,110 (15.13%)	9,574 (20.43%)
500-1000	24,830 (28.65%)	14,743 (31.47%)
1000-2000	28,764 (33.19%)	13,393 (28.59%)
2000+	19,968 (23.04%)	9,142 (19.51%)
Total number	86672	46852
Total length	124552729	61398999
N50 length	1936	1840
Mean length	1437.06	1310.49
The N50 value is defined as the contig length where half the assembly is represented by contigs of this size or longer

## Sheet: Table S6
Table S6 Summary of the annotation results
#Anno_Database	Annotated_Number	300<=length<1000	length>=1000
COG_Annotation	16177	6501	9676
GO_Annotation	24070	10311	13759
KEGG_Annotation	18607	9026	9581
KOG_Annotation	23753	10509	13244
Pfam_Annotation	32760	12433	20327
Swissprot_Annotation	25142	10461	14678
eggNOG_Annotation	33889	14436	19453
nr_Annotation	35524	15394	20130
All_Annotated	37183	16608	20575

## Sheet: Table S7
Table S7 Information of unigene annotations to public databases
#GeneID	COG_class	COG_class_annotation	GO_annotation	KEGG_annotation	KOG_class	KOG_class_annotation	Pfam_annotation	Swissprot_annotation	eggNOG_class	eggNOG_class_annotation	nr_annotation
c1000171.graph_c0	[H]	Coenzyme transport and metabolism	Molecular Function: methionine adenosyltransferase activity (GO:0004478);; Molecular Function: ATP binding (GO:0005524);; Biological Process: S-adenosylmethionine biosynthetic process (GO:0006556);; Biological Process: one-carbon metabolic process (GO:0006730);; Molecular Function: metal ion binding (GO:0046872);;	K00789|1.29456e-55|ccp:CHC_T00001840001|K00789 S-adenosylmethionine synthetase [EC:2.5.1.6] | (RefSeq) hypothetical protein	[H]	Coenzyme transport and metabolism	S-adenosylmethionine synthetase, C-terminal domain	S-adenosylmethionine synthase 2 OS=Picea sitchensis OX=3332 GN=METK2 PE=2 SV=1	H	Coenzyme transport and metabolism	s-adenosylmethionine synthetase [Nannochloropsis gaditana]
c1000507.graph_c1	[O]	Posttranslational modification, protein turnover, chaperones	--	K04078|3.85542e-31|gsl:Gasu_36070|K04078 chaperonin GroES | (RefSeq) chaperonin GroES	[O]	Posttranslational modification, protein turnover, chaperones	Chaperonin 10 Kd subunit	10 kDa chaperonin, mitochondrial OS=Arabidopsis thaliana OX=3702 GN=CPN10 PE=1 SV=1	O	Posttranslational modification, protein turnover, chaperones	chaperonin GroES [Galdieria sulphuraria]
c1001069.graph_c0	--	--	Molecular Function: hydrolase activity (GO:0016787);;	K01074|5.34418e-31|vcn:VOLCADRAFT_84379|K01074 palmitoyl-protein thioesterase [EC:3.1.2.22] | (RefSeq) hypothetical protein	[IO]	--	Palmitoyl protein thioesterase	--	S	Function unknown	hypothetical protein EMIHUDRAFT_426418 [Emiliania huxleyi CCMP1516]
c1001204.graph_c0	[E]	Amino acid transport and metabolism	Cellular Component: mitochondrion (GO:0005739);; Cellular Component: vacuolar membrane (GO:0005774);; Molecular Function: zinc ion binding (GO:0008270);; Molecular Function: alanine-glyoxylate transaminase activity (GO:0008453);; Biological Process: arginine catabolic process to glutamate (GO:0019544);; Biological Process: response to cadmium ion (GO:0046686);;	K00827|3.81073e-122|csl:COCSUDRAFT_29200|K00827 alanine-glyoxylate transaminase / (R)-3-amino-2-methylpropionate-pyruvate transaminase [EC:2.6.1.44 2.6.1.40] | (RefSeq) alanine-glyoxylate transaminase	[E]	Amino acid transport and metabolism	Aminotransferase class-III	Alanine--glyoxylate aminotransferase 2 homolog 1, mitochondrial OS=Arabidopsis thaliana OX=3702 GN=AGT2 PE=1 SV=1	E	Amino acid transport and metabolism	hypothetical protein CEUSTIGMA_g7154.t1 [Chlamydomonas eustigma]
c1002620.graph_c1	--	--	--	--	[T]	Signal transduction mechanisms	Regulator of G protein signaling domain	--	K	Transcription	--
c1002654.graph_c0	[T]	Signal transduction mechanisms	Molecular Function: protein kinase activity (GO:0004672);; Molecular Function: binding (GO:0005488);; Cellular Component: nucleus (GO:0005634);; Biological Process: negative regulation of organelle organization (GO:0010639);; Biological Process: negative regulation of G2/M transition of mitotic cell cycle (GO:0010972);; Biological Process: peptidyl-tyrosine phosphorylation (GO:0018108);; Biologic…	K06633|1.40636e-40|ppp:PHYPADRAFT_221161|K06633 membrane-associated tyrosine- and threonine-specific cdc2-inhibitory kinase [EC:2.7.11.1] | (RefSeq) hypothetical protein	[D]	Cell cycle control, cell division, chromosome partitioning	Protein kinase domain;; Protein tyrosine kinase;; Kinase-like	Wee1-like protein kinase OS=Oryza sativa subsp. japonica OX=39947 GN=WEE1 PE=3 SV=1	T	Signal transduction mechanisms	WEE protein kinase [Spizellomyces punctatus DAOM BR117]
c1003040.graph_c0	[M]	Cell wall/membrane/envelope biogenesis	--	K12451|4.80023e-121|cre:CHLREDRAFT_158152|K12451 3,5-epimerase/4-reductase [EC:5.1.3.- 1.1.1.-] | (RefSeq) 3,5-epimerase/4-reductase	[G]	Carbohydrate transport and metabolism	RmlD substrate binding domain;; NAD dependent epimerase/dehydratase family;; GDP-mannose 4,6 dehydratase	Bifunctional dTDP-4-dehydrorhamnose 3,5-epimerase/dTDP-4-dehydrorhamnose reductase OS=Arabidopsis thaliana OX=3702 GN=NRS/ER PE=1 SV=1	M	Cell wall/membrane/envelope biogenesis	epimerase 4-reductase [Nannochloropsis gaditana]
c1003864.graph_c0	--	--	--	--	[R]	General function prediction only	CTLH/CRA C-terminal to LisH motif domain;; SPRY domain;; LisH	Ran-binding protein M homolog OS=Arabidopsis thaliana OX=3702 GN=RANBPM PE=1 SV=1	S	Function unknown	SPRY-domain-containing protein [Basidiobolus meristosporus CBS 931.73]
c1004122.graph_c1	[J]	Translation, ribosomal structure and biogenesis	Biological Process: metabolic process (GO:0008152);;	K03500|6.12224e-17|nnu:104587888|K03500 16S rRNA (cytosine967-C5)-methyltransferase [EC:2.1.1.176] | (RefSeq) ribosomal RNA small subunit methyltransferase B	[A]	RNA processing and modification	16S rRNA methyltransferase RsmB/F;; Methyltransferase domain	--	--	--	hypothetical protein EMIHUDRAFT_255181, partial [Emiliania huxleyi CCMP1516]
c1004229.graph_c0	--	--	--	K09377|2.82683e-12|gmx:100800234|K09377 cysteine and glycine-rich protein | (RefSeq) LIM domain-containing protein PLIM2b-like	[TZ]	--	LIM domain	LIM domain-containing protein PLIM2c OS=Arabidopsis thaliana OX=3702 GN=PLIM2C PE=1 SV=1	S	Function unknown	hypothetical protein M427DRAFT_95618, partial [Gonapodya prolifera JEL478]
c1005430.graph_c0	--	--	--	--	--	--	Domain of unknown function (DUF4360)	--	S	Function unknown	hypothetical protein LY89DRAFT_642471 [Phialocephala scopiformis]
c1008319.graph_c0	--	--	--	--	--	--	non-SMC mitotic condensation complex subunit 1, N-term	--	--	--	--
c1008458.graph_c0	--	--	--	K10398|1.78994e-12|csv:101203106|K10398 kinesin family member 11 | (RefSeq) 125 kDa kinesin-related protein	[Z]	Cytoskeleton	Kinesin motor domain	Kinesin-like protein KIN-5C OS=Arabidopsis thaliana OX=3702 GN=KIN5C PE=2 SV=2	Z	Cytoskeleton	Kinesin family member 4/21/27 [Rhizophagus irregularis DAOM 181602]
c1008564.graph_c0	--	--	--	--	[T]	Signal transduction mechanisms	Protein tyrosine kinase;; Protein kinase domain;; SH2 domain;; CBL proto-oncogene N-terminus, EF hand-like domain	Probable serine/threonine-protein kinase SIS8 OS=Arabidopsis thaliana OX=3702 GN=SIS8 PE=1 SV=1	T	Signal transduction mechanisms	serine/threonine-protein kinase CTR1-like [Phalaenopsis equestris]
c1008882.graph_c0	--	--	--	--	--	--	--	--	--	--	hypothetical protein M378DRAFT_132856 [Amanita muscaria Koide BX008]
c1009424.graph_c1	--	--	--	--	--	--	--	--	--	--	hypothetical protein SPPG_08977 [Spizellomyces punctatus DAOM BR117]
c1012032.graph_c0	[P]	Inorganic ion transport and metabolism	--	--	--	--	Beta-lactamase superfamily domain	--	S	Function unknown	hypothetical protein BCR32DRAFT_234467 [Anaeromyces robustus]
c1012396.graph_c0	[C]	Energy production and conversion	Biological Process: metabolic process (GO:0008152);; Molecular Function: oxidoreductase activity (GO:0016491);;	K12355|1.23742e-18|gmx:100791918|K12355 coniferyl-aldehyde dehydrogenase [EC:1.2.1.68] | (RefSeq) aldehyde dehydrogenase family 2 member C4	[C]	Energy production and conversion	Aldehyde dehydrogenase family	Succinate-semialdehyde dehydrogenase, mitochondrial OS=Oryza sativa subsp. japonica OX=39947 GN=ALDH5F1 PE=3 SV=1	C	Energy production and conversion	succinate-semialdehyde dehydrogenase (NADP+), partial [Puccinia triticina 1-1 BBBD Race 1]
c1013381.graph_c0	--	--	Cellular Component: intracellular non-membrane-bounded organelle (GO:0043232);; Cellular Component: cytoplasmic part (GO:0044444);;	K02918|1.35652e-24|gsl:Gasu_07620|K02918 large subunit ribosomal protein L35e | (RefSeq) 60S ribosomal protein L35	[J]	Translation, ribosomal structure and biogenesis	Ribosomal L29 protein	60S ribosomal protein L35-3 OS=Arabidopsis thaliana OX=3702 GN=RPL35C PE=2 SV=1	J	Translation, ribosomal structure and biogenesis	large subunit ribosomal protein L35e_1, cytoplasmic [Guillardia theta CCMP2712]
c1013475.graph_c0	--	--	--	--	--	--	Transmembrane amino acid transporter protein	--	--	--	--
c1014485.graph_c0	[F]	Nucleotide transport and metabolism	Molecular Function: oxidoreductase activity, acting on CH or CH2 groups (GO:0016725);; Cellular Component: membrane part (GO:0044425);; Biological Process: single-organism process (GO:0044699);; Molecular Function: metal ion binding (GO:0046872);; Molecular Function: coenzyme binding (GO:0050662);; Molecular Function: iron-sulfur cluster binding (GO:0051536);; Molecular Function: organic cyclic c…	K09842|1.09267e-50|brp:103844240|K09842 abscisic-aldehyde oxidase [EC:1.2.3.14] | (RefSeq) benzaldehyde dehydrogenase (NAD(+))	[F]	Nucleotide transport and metabolism	[2Fe-2S] binding domain;; 2Fe-2S iron-sulfur cluster binding domain	Benzaldehyde dehydrogenase (NAD(+)) OS=Arabidopsis thaliana OX=3702 GN=AAO4 PE=1 SV=2	F	Nucleotide transport and metabolism	Xanthine dehydrogenase/oxidase [Rhizophagus irregularis DAOM 181602]
c1015672.graph_c0	--	--	Molecular Function: GTP binding (GO:0005525);; Cellular Component: intracellular (GO:0005622);; Biological Process: small GTPase mediated signal transduction (GO:0007264);;	K04392|6.46005e-36|cam:101498092|K04392 Ras-related C3 botulinum toxin substrate 1 | (RefSeq) rac-like GTP-binding protein RAC13	[R]	General function prediction only	Ras family;; Ras of Complex, Roc, domain of DAPkinase;; ADP-ribosylation factor family	Rac-like GTP-binding protein ARAC2 OS=Arabidopsis thaliana OX=3702 GN=ARAC2 PE=1 SV=1	S	Function unknown	small GTP-binding protein domain [Allomyces macrogynus ATCC 38327]
c1015890.graph_c0	--	--	--	--	--	--	--	--	--	--	hypothetical protein LSAT_4X50261 [Lactuca sativa]
c1015980.graph_c0	--	--	Cellular Component: integral component of membrane (GO:0016021);;	--	[S]	Function unknown	Transmembrane proteins 14C	Protein FATTY ACID EXPORT 6 OS=Arabidopsis thaliana OX=3702 GN=FAX6 PE=3 SV=1	--	--	Hypothetical protein PINS_001756, partial [Pythium insidiosum]
c1016371.graph_c0	--	--	--	K20347|1.22854e-18|ccp:CHC_T00003720001|K20347 p24 family protein beta-1 | (RefSeq) hypothetical protein	[U]	Intracellular trafficking, secretion, and vesicular transport	emp24/gp25L/p24 family/GOLD	Transmembrane emp24 domain-containing protein p24beta3 OS=Arabidopsis thaliana OX=3702 GN=At3g22845 PE=2 SV=1	U	Intracellular trafficking, secretion, and vesicular transport	copii-coated vesicle protein [Xanthophyllomyces dendrorhous]
c1016607.graph_c0	--	--	Cellular Component: nucleosome (GO:0000786);; Molecular Function: DNA binding (GO:0003677);; Cellular Component: nucleus (GO:0005634);; Molecular Function: protein heterodimerization activity (GO:0046982);;	K11251|3.22529e-52|ccp:CHC_T00008687001|K11251 histone H2A | (RefSeq) Histone H2A	[B]	Chromatin structure and dynamics	C-terminus of histone H2A;; Core histone H2A/H2B/H3/H4	Histone H2A OS=Chlamydomonas reinhardtii OX=3055 GN=H2A-II PE=3 SV=1	B	Chromatin structure and dynamics	histone H2A.2 [Hesseltinella vesiculosa]
c1016634.graph_c0	[J]	Translation, ribosomal structure and biogenesis	Molecular Function: structural constituent of ribosome (GO:0003735);; Biological Process: translation (GO:0006412);; Cellular Component: cytosolic large ribosomal subunit (GO:0022625);;	K02900|5.2047e-73|vvi:100250040|K02900 large subunit ribosomal protein L27Ae | (RefSeq) 60S ribosomal protein L27a-3-like	[J]	Translation, ribosomal structure and biogenesis	Ribosomal proteins 50S-L15, 50S-L18e, 60S-L27A	60S ribosomal protein L27a-3 OS=Arabidopsis thaliana OX=3702 GN=RPL27AC PE=2 SV=2	J	Translation, ribosomal structure and biogenesis	Ribosomal protein [Parasponia andersonii]
c1017970.graph_c3	[L]	Replication, recombination and repair	--	--	--	--	--	--	L	Replication, recombination and repair	--
c1018181.graph_c2	[IQ]	--	Biological Process: single-organism metabolic process (GO:0044710);;	K03955|2.75198e-25|ccp:CHC_T00009135001|K03955 NADH dehydrogenase (ubiquinone) 1 alpha/beta subcomplex 1 | (RefSeq) Acyl carrier protein	[CIQ]	--	Phosphopantetheine attachment site	Acyl carrier protein 2, mitochondrial OS=Arabidopsis thaliana OX=3702 GN=MTACP2 PE=1 SV=1	I	Lipid transport and metabolism	NADH dehydrogenase (ubiquinone) 1 alpha/beta subcomplex 1 [Fistulifera solaris]
c1018359.graph_c1	--	--	Molecular Function: structural molecule activity (GO:0005198);; Biological Process: intracellular protein transport (GO:0006886);; Biological Process: endocytosis (GO:0006897);; Cellular Component: clathrin coat of trans-Golgi network vesicle (GO:0030130);; Cellular Component: clathrin coat of coated pit (GO:0030132);;	K04646|0|ppp:PHYPADRAFT_158810|K04646 clathrin heavy chain | (RefSeq) hypothetical protein	[U]	Intracellular trafficking, secretion, and vesicular transport	Region in Clathrin and VPS;; Clathrin propeller repeat;; Clathrin-H-link;; Clathrin, heavy-chain linker	Clathrin heavy chain 1 OS=Oryza sativa subsp. japonica OX=39947 GN=Os11g0104900 PE=3 SV=1	U	Intracellular trafficking, secretion, and vesicular transport	hypothetical protein SPPG_04450 [Spizellomyces punctatus DAOM BR117]
c1019250.graph_c0	[J]	Translation, ribosomal structure and biogenesis	Molecular Function: structural constituent of ribosome (GO:0003735);; Cellular Component: ribosome (GO:0005840);; Biological Process: translation (GO:0006412);;	K02957|2.34342e-60|ccp:CHC_T00010168001|K02957 small subunit ribosomal protein S15Ae | (RefSeq) 40S ribosomal protein S15a	[J]	Translation, ribosomal structure and biogenesis	Ribosomal protein S8	40S ribosomal protein S15a OS=Daucus carota OX=4039 GN=RPS15A PE=2 SV=3	J	Translation, ribosomal structure and biogenesis	conserved unknown protein [Ectocarpus siliculosus]
c1019372.graph_c1	--	--	--	--	[R]	General function prediction only	--	--	S	Function unknown	hypothetical protein RMCBS344292_10017 [Rhizopus microsporus]
c1019641.graph_c0	--	--	--	--	--	--	--	--	S	Function unknown	hypothetical protein AURANDRAFT_35068 [Aureococcus anophagefferens]
c1019701.graph_c1	[R]	General function prediction only	--	--	[C]	Energy production and conversion	Aldo/keto reductase family	Perakine reductase OS=Rauvolfia serpentina OX=4060 GN=PR PE=1 SV=1	C	Energy production and conversion	oxidoreductase [Dorcoceras hygrometricum]
c1019790.graph_c0	[M]	Cell wall/membrane/envelope biogenesis	Biological Process: nitrogen compound metabolic process (GO:0006807);; Molecular Function: hydrolase activity (GO:0016787);; Biological Process: cellular metabolic process (GO:0044237);; Biological Process: primary metabolic process (GO:0044238);; Biological Process: organic substance metabolic process (GO:0071704);;	--	[G]	Carbohydrate transport and metabolism	Glycosyl hydrolase family 30 TIM-barrel domain	--	G	Carbohydrate transport and metabolism	Glucosylceramidase, family GH30 [Ectocarpus siliculosus]
c1019867.graph_c0	--	--	--	--	--	--	Type I restriction enzyme R protein N terminus (HSDR_N)	--	--	--	--
c1020390.graph_c0	[J]	Translation, ribosomal structure and biogenesis	Cellular Component: intracellular organelle (GO:0043229);; Cellular Component: cytoplasmic part (GO:0044444);;	K02875|5.85697e-37|gsl:Gasu_42990|K02875 large subunit ribosomal protein L14e | (RefSeq) 60S ribosomal protein L14e	[J]	Translation, ribosomal structure and biogenesis	Ribosomal protein L14	Probable 60S ribosomal protein L14 OS=Pisum sativum OX=3888 PE=2 SV=1	J	Translation, ribosomal structure and biogenesis	hypothetical protein PIROE2DRAFT_68475 [Piromyces sp. E2]
c1021081.graph_c0	[O]	Posttranslational modification, protein turnover, chaperones	--	K09510|7.2975e-18|crb:CARUB_v10021510mg|K09510 DnaJ homolog subfamily B member 4 | (RefSeq) hypothetical protein	[O]	Posttranslational modification, protein turnover, chaperones	DnaJ domain	Chaperone protein dnaJ 6 OS=Arabidopsis thaliana OX=3702 GN=ATJ6 PE=2 SV=1	O	Posttranslational modification, protein turnover, chaperones	dnaJsubfamily B member 1 [Dorcoceras hygrometricum]
c1022085.graph_c0	--	--	--	K00599|1.28639e-21|mis:MICPUN_76254|K00599 methyltransferase-like protein 6 [EC:2.1.1.-] | (RefSeq) hypothetical protein	[R]	General function prediction only	Methyltransferase small domain	--	S	Function unknown	predicted protein, partial [Micromonas commoda]
c1022114.graph_c0	--	--	Molecular Function: peptidase activity (GO:0008233);;	--	--	--	--	--	O	Posttranslational modification, protein turnover, chaperones	predicted protein [Hordeum vulgare subsp. vulgare]
c1025077.graph_c1	--	--	--	--	--	--	--	--	L	Replication, recombination and repair	acid ceramidase-like protein [Chrysochromulina sp. CCMP291]
c1025691.graph_c0	--	--	Biological Process: ribosomal large subunit assembly (GO:0000027);; Molecular Function: nucleotide binding (GO:0000166);; Biological Process: cytoplasmic translation (GO:0002181);; Molecular Function: RNA binding (GO:0003723);; Molecular Function: structural constituent of ribosome (GO:0003735);; Cellular Component: cytosolic large ribosomal subunit (GO:0022625);;	K02893|8.63815e-19|osa:4326469|K02893 large subunit ribosomal protein L23Ae | (RefSeq) 60S ribosomal protein L23A	[J]	Translation, ribosomal structure and biogenesis	Ribosomal protein L23, N-terminal domain	60S ribosomal protein L23A OS=Fritillaria agrestis OX=64177 GN=RPL23A PE=2 SV=1	J	Translation, ribosomal structure and biogenesis	60S ribosomal protein L25 [[Nectria] haematococca mpVI 77-13-4]
c1025703.graph_c0	--	--	Cellular Component: nucleosome (GO:0000786);; Molecular Function: DNA binding (GO:0003677);; Cellular Component: nucleus (GO:0005634);; Molecular Function: protein heterodimerization activity (GO:0046982);;	K11253|1.78521e-65|obr:102704769|K11253 histone H3 | (RefSeq) histone H3	[B]	Chromatin structure and dynamics	Core histone H2A/H2B/H3/H4	Histone H3.2 OS=Encephalartos altensteinii OX=3300 PE=1 SV=2	B	Chromatin structure and dynamics	histone H3 isoform 1c [Phaeodactylum tricornutum CCAP 1055/1]
c1025727.graph_c0	--	--	Cellular Component: endomembrane system (GO:0012505);; Cellular Component: membrane (GO:0016020);; Cellular Component: membrane-bounded organelle (GO:0043227);; Cellular Component: intracellular organelle (GO:0043229);; Biological Process: primary metabolic process (GO:0044238);; Cellular Component: cytoplasmic part (GO:0044444);; Biological Process: organic substance metabolic process (GO:007170…	--	[U]	Intracellular trafficking, secretion, and vesicular transport	C2 domain	Protein C2-DOMAIN ABA-RELATED 8 OS=Arabidopsis thaliana OX=3702 GN=CAR8 PE=2 SV=1	S	Function unknown	C2-domain-containing protein [Mortierella elongata AG-77]
c1025770.graph_c0	--	--	Cellular Component: nucleus (GO:0005634);;	K09272|1.52231e-11|pop:POPTR_0004s12290g|K09272 structure-specific recognition protein 1 | (RefSeq) POPTRDRAFT_712808; Structure-specific recognition protein 1	[R]	General function prediction only	HMG (high mobility group) box;; HMG-box domain;; CHDNT (NUC034) domain	FACT complex subunit SSRP1 OS=Vicia faba OX=3906 GN=SSRP1 PE=2 SV=1	B	Chromatin structure and dynamics	Structure-specific recognition protein 1 [Populus trichocarpa]
c1025788.graph_c0	[J]	Translation, ribosomal structure and biogenesis	Molecular Function: structural constituent of ribosome (GO:0003735);; Cellular Component: ribosome (GO:0005840);; Biological Process: translation (GO:0006412);;	K02930|2.28301e-44|ppp:PHYPADRAFT_180220|K02930 large subunit ribosomal protein L4e | (RefSeq) hypothetical protein	[A]	RNA processing and modification	Ribosomal protein L4/L1 family	60S ribosomal protein L4 OS=Prunus armeniaca OX=36596 GN=RPL4 PE=2 SV=1	J	Translation, ribosomal structure and biogenesis	hypothetical protein PHYBLDRAFT_120760 [Phycomyces blakesleeanus NRRL 1555(-)]
c1025788.graph_c1	[J]	Translation, ribosomal structure and biogenesis	Molecular Function: structural constituent of ribosome (GO:0003735);; Cellular Component: ribosome (GO:0005840);; Biological Process: translation (GO:0006412);;	K02930|2.58796e-98|vcn:VOLCADRAFT_103563|K02930 large subunit ribosomal protein L4e | (RefSeq) rpl4; component of cytosolic 80S ribosome and 60S large subunit	[A]	RNA processing and modification	Ribosomal protein L4/L1 family;; 60S ribosomal protein L4 C-terminal domain	60S ribosomal protein L4 OS=Prunus armeniaca OX=36596 GN=RPL4 PE=2 SV=1	J	Translation, ribosomal structure and biogenesis	60s ribosomal protein l4 [Malassezia pachydermatis]
c1025808.graph_c0	--	--	Cellular Component: endoplasmic reticulum membrane (GO:0005789);; Biological Process: transport (GO:0006810);; Cellular Component: integral component of membrane (GO:0016021);;	--	[U]	Intracellular trafficking, secretion, and vesicular transport	emp24/gp25L/p24 family/GOLD	Transmembrane emp24 domain-containing protein p24delta3 OS=Arabidopsis thaliana OX=3702 GN=At1g09580 PE=1 SV=1	U	Intracellular trafficking, secretion, and vesicular transport	Hypothetical protein PINS_006556 [Pythium insidiosum]
c1025819.graph_c0	[M]	Cell wall/membrane/envelope biogenesis	Biological Process: nitrogen compound metabolic process (GO:0006807);; Molecular Function: oxidoreductase activity, acting on the CH-OH group of donors, NAD or NADP as acceptor (GO:0016616);; Biological Process: primary metabolic process (GO:0044238);; Cellular Component: intracellular part (GO:0044424);; Biological Process: single-organism metabolic process (GO:0044710);; Biological Process: car…	K00012|3.94943e-120|cvr:CHLNCDRAFT_59627|K00012 UDPglucose 6-dehydrogenase [EC:1.1.1.22] | (RefSeq) hypothetical protein	[GT]	--	--	UDP-glucose 6-dehydrogenase 4 OS=Oryza sativa subsp. japonica OX=39947 GN=UGD4 PE=2 SV=1	M	Cell wall/membrane/envelope biogenesis	hypothetical protein POPTR_0010s16730g [Populus trichocarpa]
c1025823.graph_c0	--	--	Cellular Component: intracellular (GO:0005622);; Molecular Function: peptidase activity (GO:0008233);;	K05609|5.34203e-56|smo:SELMODRAFT_95093|K05609 ubiquitin carboxyl-terminal hydrolase L3 [EC:3.4.19.12] | (RefSeq) hypothetical protein	[O]	Posttranslational modification, protein turnover, chaperones	Ubiquitin carboxyl-terminal hydrolase, family 1	Ubiquitin carboxyl-terminal hydrolase 3 OS=Arabidopsis thaliana OX=3702 GN=UCH3 PE=2 SV=1	O	Posttranslational modification, protein turnover, chaperones	Yuh1p [Rhizophagus irregularis DAOM 197198w]
c1025825.graph_c0	--	--	--	--	[R]	General function prediction only	Reverse transcriptase-like;; zinc-binding in reverse transcriptase	Putative ribonuclease H protein At1g65750 OS=Arabidopsis thaliana OX=3702 GN=At1g65750 PE=3 SV=1	S	Function unknown	uncharacterized protein LOC107607211 [Arachis ipaensis]
c1025863.graph_c1	--	--	Biological Process: carbon catabolite regulation of transcription from RNA polymerase II promoter (GO:0000429);; Molecular Function: RNA polymerase II regulatory region sequence-specific DNA binding (GO:0000977);; Molecular Function: transcription factor activity, sequence-specific DNA binding (GO:0003700);; Cellular Component: nucleus (GO:0005634);; Biological Process: carbon utilization (GO:001…	--	--	--	Fungal Zn(2)-Cys(6) binuclear cluster domain	--	S	Function unknown	hypothetical protein BSLG_02842 [Batrachochytrium salamandrivorans]
c1025866.graph_c0	--	--	--	--	--	--	Ubiquitin family;; AN1-like Zinc finger;; Ubiquitin-2 like Rad60 SUMO-like	--	O	Posttranslational modification, protein turnover, chaperones	ubiquitin-domain-containing protein [Basidiobolus meristosporus CBS 931.73]
c1025913.graph_c0	--	--	--	K14001|8.48891e-10|pxb:103944727|K14001 nucleotide exchange factor SIL1 | (RefSeq) hsp70 nucleotide exchange factor FES1	[O]	Posttranslational modification, protein turnover, chaperones	Nucleotide exchange factor Fes1	--	O	Posttranslational modification, protein turnover, chaperones	Fes1-domain-containing protein [Rhizoclosmatium globosum]
c1025928.graph_c0	--	--	--	K04523|5.13201e-30|gsl:Gasu_02810|K04523 ubiquilin | (RefSeq) ubiquilin	[OR]	--	Ubiquitin family;; Ubiquitin-2 like Rad60 SUMO-like;; UBA/TS-N domain	Ubiquitin domain-containing protein DSK2a OS=Arabidopsis thaliana OX=3702 GN=DSK2A PE=1 SV=2	O	Posttranslational modification, protein turnover, chaperones	PREDICTED: ubiquitin domain-containing protein DSK2b-like isoform X8 [Vigna angularis]
c1025960.graph_c0	--	--	--	--	--	--	--	--	S	Function unknown	hypothetical protein [Absidia glauca]
c1026010.graph_c0	--	--	Molecular Function: thiol-dependent ubiquitin-specific protease activity (GO:0004843);; Cellular Component: cytoplasm (GO:0005737);; Biological Process: ubiquitin-dependent protein catabolic process (GO:0006511);; Biological Process: protein deubiquitination (GO:0016579);;	K05609|2.27458e-75|mpp:MICPUCDRAFT_13449|K05609 ubiquitin carboxyl-terminal hydrolase L3 [EC:3.4.19.12] | (RefSeq) hypothetical protein	[O]	Posttranslational modification, protein turnover, chaperones	Ubiquitin carboxyl-terminal hydrolase, family 1	Ubiquitin carboxyl-terminal hydrolase 3 OS=Arabidopsis thaliana OX=3702 GN=UCH3 PE=2 SV=1	O	Posttranslational modification, protein turnover, chaperones	ubiquitin carboxyl-terminal hydrolase, putative [Phytophthora infestans T30-4]
c1026071.graph_c0	[QV]	--	Molecular Function: binding (GO:0005488);; Cellular Component: endomembrane system (GO:0012505);; Cellular Component: membrane (GO:0016020);; Molecular Function: oxidoreductase activity (GO:0016491);; Cellular Component: intracellular membrane-bounded organelle (GO:0043231);; Cellular Component: cytoplasmic part (GO:0044444);; Biological Process: single-organism metabolic process (GO:0044710);;	K05917|5.72344e-76|crb:CARUB_v10008973mg|K05917 sterol 14-demethylase [EC:1.14.13.70] | (RefSeq) hypothetical protein	[Q]	Secondary metabolites biosynthesis, transport and catabolism	Cytochrome P450	Sterol 14-demethylase OS=Arabidopsis thaliana OX=3702 GN=CYP51G1 PE=1 SV=1	Q	Secondary metabolites biosynthesis, transport and catabolism	lanosterol 14-alpha demethylase [Hesseltinella vesiculosa]
c1026094.graph_c0	[J]	Translation, ribosomal structure and biogenesis	Molecular Function: structural constituent of ribosome (GO:0003735);; Biological Process: translation (GO:0006412);; Cellular Component: chloroplast (GO:0009507);; Cellular Component: small ribosomal subunit (GO:0015935);;	K02973|7.0424e-32|ota:Ot06g02030|K02973 small subunit ribosomal protein S23e | (RefSeq) 40S ribosomal protein S23 (ISS)	[J]	Translation, ribosomal structure and biogenesis	Ribosomal protein S12/S23	40S ribosomal protein S23 OS=Euphorbia esula OX=3993 GN=RPS23 PE=2 SV=1	J	Translation, ribosomal structure and biogenesis	PREDICTED: 40S ribosomal protein S23-2 [Camelina sativa]
c1026098.graph_c0	--	--	--	--	[T]	Signal transduction mechanisms	CS domain	Protein BOBBER 1 OS=Arabidopsis thaliana OX=3702 GN=BOB1 PE=1 SV=1	S	Function unknown	CS-like domain protein [Nannochloropsis gaditana]
c1026109.graph_c0	[G]	Carbohydrate transport and metabolism	--	--	[GC]	--	Glycosyltransferase family 28 N-terminal domain	Sterol 3-beta-glucosyltransferase UGT80A2 OS=Arabidopsis thaliana OX=3702 GN=UGT80A2 PE=1 SV=1	S	Function unknown	UDP-Glycosyltransferase/glycogen phosphorylase [Basidiobolus meristosporus CBS 931.73]
c1026133.graph_c0	[P]	Inorganic ion transport and metabolism	--	K01674|3.87637e-26|jcu:105634691|K01674 carbonic anhydrase [EC:4.2.1.1] | (RefSeq) alpha carbonic anhydrase 1, chloroplastic-like	[R]	General function prediction only	Eukaryotic-type carbonic anhydrase	Bifunctional monodehydroascorbate reductase and carbonic anhydrase nectarin-3 OS=Nicotiana langsdorffii x Nicotiana sanderae OX=164110 GN=NEC3 PE=1 SV=1	P	Inorganic ion transport and metabolism	carbonic anhydrase, putative [Pythium insidiosum]
c1026152.graph_c0	--	--	Biological Process: response to light stimulus (GO:0009416);; Cellular Component: photosystem I (GO:0009522);; Cellular Component: chloroplast thylakoid membrane (GO:0009535);; Biological Process: photosynthesis, light harvesting in photosystem I (GO:0009768);; Cellular Component: chloroplast envelope (GO:0009941);; Cellular Component: plastoglobule (GO:0010287);; Cellular Component: integral com…	K08912|1.45915e-18|cvr:CHLNCDRAFT_59709|K08912 light-harvesting complex II chlorophyll a/b binding protein 1 | (RefSeq) hypothetical protein	--	--	Chlorophyll A-B binding protein	Chlorophyll a-b binding protein, chloroplastic OS=Physcomitrella patens subsp. patens OX=3218 GN=PHYPADRAFT_124625 PE=3 SV=2	J	Translation, ribosomal structure and biogenesis	hypothetical protein CHLNCDRAFT_59709 [Chlorella variabilis]
c1026170.graph_c0	[O]	Posttranslational modification, protein turnover, chaperones	Biological Process: single-organism process (GO:0044699);;	K03671|9.32629e-24|gsl:Gasu_13580|K03671 thioredoxin 1 | (RefSeq) thioredoxin 1	[O]	Posttranslational modification, protein turnover, chaperones	Thioredoxin	Thioredoxin OS=Porphyra purpurea OX=2787 GN=trxA PE=3 SV=1	O	Posttranslational modification, protein turnover, chaperones	related to thioredoxin, putative-Aspergillus flavus [Serendipita indica DSM 11827]
c1026184.graph_c0	--	--	--	--	--	--	--	--	S	Function unknown	hypothetical protein PV05_02818 [Exophiala xenobiotica]
c1026199.graph_c0	--	--	--	--	[S]	Function unknown	PQ loop repeat	--	S	Function unknown	hypothetical protein RirG_024980 [Rhizophagus irregularis DAOM 197198w]
c1026234.graph_c0	[IQ]	--	--	--	[I]	Lipid transport and metabolism	AMP-binding enzyme	--	--	--	Pc16g09930 [Penicillium rubens Wisconsin 54-1255]
c1026303.graph_c0	--	--	Molecular Function: protein binding (GO:0005515);; Biological Process: vesicle-mediated transport (GO:0016192);; Cellular Component: membrane part (GO:0044425);; Biological Process: single-organism cellular process (GO:0044763);;	K08515|5.37407e-38|ppp:PHYPADRAFT_188169|K08515 vesicle-associated membrane protein 7 | (RefSeq) VAMP71A2; R-SNARE, VAMP71-family	[U]	Intracellular trafficking, secretion, and vesicular transport	Synaptobrevin;; Regulated-SNARE-like domain	Vesicle-associated membrane protein 714 OS=Arabidopsis thaliana OX=3702 GN=VAMP714 PE=1 SV=1	U	Intracellular trafficking, secretion, and vesicular transport	hypothetical protein AURANDRAFT_20205 [Aureococcus anophagefferens]
c1026376.graph_c0	--	--	Molecular Function: aspartic-type endopeptidase activity (GO:0004190);; Biological Process: proteolysis (GO:0006508);; Biological Process: lipid metabolic process (GO:0006629);; Cellular Component: integral component of membrane (GO:0016021);; Biological Process: protein catabolic process (GO:0030163);;	K08245|7.4807e-58|gmx:547943|K08245 phytepsin [EC:3.4.23.40] | (RefSeq) SOYAP4; aspartic proteinase A1	[O]	Posttranslational modification, protein turnover, chaperones	Saposin-like type B, region 2;; Eukaryotic aspartyl protease	Aspartic proteinase OS=Cucurbita pepo OX=3663 PE=2 SV=1	O	Posttranslational modification, protein turnover, chaperones	aspartic proteinase-like [Cajanus cajan]
c1026388.graph_c0	--	--	--	--	--	--	Fascin domain	--	--	--	--
c1026420.graph_c0	[C]	Energy production and conversion	--	K02134|2.42443e-18|cic:CICLE_v10022328mg|K02134 F-type H+-transporting ATPase subunit delta | (RefSeq) hypothetical protein	[C]	Energy production and conversion	ATP synthase, Delta/Epsilon chain, beta-sandwich domain	ATP synthase subunit delta&apos;, mitochondrial OS=Ipomoea batatas OX=4120 PE=1 SV=1	C	Energy production and conversion	ATP synthase subunit delta&apos;, mitochondrial [Manihot esculenta]
c1026434.graph_c0	[R]	General function prediction only	Biological Process: cellular metabolic process (GO:0044237);; Cellular Component: intracellular part (GO:0044424);; Biological Process: organic substance metabolic process (GO:0071704);;	K03152|9.09509e-32|cvr:CHLNCDRAFT_135695|K03152 4-methyl-5(b-hydroxyethyl)-thiazole monophosphate biosynthesis | (RefSeq) hypothetical protein	[RV]	--	DJ-1/PfpI family	Protein DJ-1 homolog B OS=Arabidopsis thaliana OX=3702 GN=DJ1B PE=1 SV=1	S	Function unknown	conserved hypothetical protein [Sporisorium reilianum SRZ2]
c1026440.graph_c0	--	--	--	--	--	--	Cytochrome c oxidase subunit Vb	Putative cytochrome c oxidase subunit 5b-like OS=Arabidopsis thaliana OX=3702 GN=At1g52710 PE=3 SV=2	O	Posttranslational modification, protein turnover, chaperones	cytochrome c oxidase subunit vb [Nannochloropsis gaditana]
c1026447.graph_c0	[F]	Nucleotide transport and metabolism	Molecular Function: GMP reductase activity (GO:0003920);; Biological Process: purine nucleobase metabolic process (GO:0006144);; Biological Process: purine nucleotide metabolic process (GO:0006163);; Molecular Function: metal ion binding (GO:0046872);; Biological Process: oxidation-reduction process (GO:0055114);; Cellular Component: GMP reductase complex (GO:1902560);;	K00088|1.1513e-27|pvu:PHAVU_005G048700g|K00088 IMP dehydrogenase [EC:1.1.1.205] | (RefSeq) hypothetical protein	[F]	Nucleotide transport and metabolism	IMP dehydrogenase / GMP reductase domain	GMP reductase OS=Phytophthora infestans OX=4787 PE=2 SV=1	F	Nucleotide transport and metabolism	GMP reductase [Phytophthora parasitica P1569]
c1026465.graph_c0	[J]	Translation, ribosomal structure and biogenesis	Cellular Component: intracellular ribonucleoprotein complex (GO:0030529);;	K02880|1.62101e-48|apro:F751_6961|K02880 large subunit ribosomal protein L17e | (RefSeq) 60S ribosomal protein L17-2	[J]	Translation, ribosomal structure and biogenesis	Ribosomal protein L22p/L17e	60S ribosomal protein L17 OS=Zea mays OX=4577 GN=RPL17 PE=2 SV=1	J	Translation, ribosomal structure and biogenesis	50S ribosomal protein L22 [Hesseltinella vesiculosa]
c1026468.graph_c0	[S]	Function unknown	--	--	--	--	Glycine-rich domain-containing protein-like	Glycine-rich domain-containing protein 2 OS=Arabidopsis thaliana OX=3702 GN=GRDP2 PE=2 SV=1	S	Function unknown	--
c1026496.graph_c0	--	--	--	--	--	--	--	Probable WRKY transcription factor 19 OS=Arabidopsis thaliana OX=3702 GN=WRKY19 PE=3 SV=1	--	--	hypothetical protein L915_02076 [Phytophthora parasitica]
c1026509.graph_c0	[M]	Cell wall/membrane/envelope biogenesis	Molecular Function: glucosylceramidase activity (GO:0004348);; Biological Process: carbohydrate metabolic process (GO:0005975);; Biological Process: sphingolipid metabolic process (GO:0006665);;	--	[G]	Carbohydrate transport and metabolism	Glycosyl hydrolase family 30 TIM-barrel domain;; Glycosyl hydrolase family 30 beta sandwich domain	--	G	Carbohydrate transport and metabolism	hypothetical protein L917_04714 [Phytophthora parasitica]
c1026529.graph_c0	--	--	Molecular Function: protein binding (GO:0005515);; Biological Process: regulation of cell cycle (GO:0051726);;	--	[R]	General function prediction only	Cyclin;; Cyclin, N-terminal domain	Cyclin-U4-1 OS=Arabidopsis thaliana OX=3702 GN=CYCU4-1 PE=1 SV=1	S	Function unknown	hypothetical protein AALP_AA4G236200 [Arabis alpina]
c1026554.graph_c0	[T]	Signal transduction mechanisms	--	--	[V]	Defense mechanisms	Dual specificity phosphatase, catalytic domain;; Protein-tyrosine phosphatase	Dual specificity protein phosphatase 1B OS=Arabidopsis thaliana OX=3702 GN=DSPTP1B PE=1 SV=1	T	Signal transduction mechanisms	phosphatases II [Cylindrobasidium torrendii FP15055 ss-10]
c1026573.graph_c0	--	--	--	--	[O]	Posttranslational modification, protein turnover, chaperones	Papain family cysteine protease	Senescence-specific cysteine protease SAG39 OS=Oryza sativa subsp. japonica OX=39947 GN=SAG39 PE=2 SV=2	O	Posttranslational modification, protein turnover, chaperones	senescence-specific cysteine protease SAG39 [Zea mays]
c1026573.graph_c1	[O]	Posttranslational modification, protein turnover, chaperones	Molecular Function: peptidase activity (GO:0008233);;	--	[O]	Posttranslational modification, protein turnover, chaperones	--	Thiol protease SEN102 OS=Hemerocallis sp. OX=29711 GN=SEN102 PE=2 SV=1	O	Posttranslational modification, protein turnover, chaperones	cysteine proteinase [Oxyrrhis marina]
c1026606.graph_c0	--	--	Biological Process: ribosomal large subunit assembly (GO:0000027);; Molecular Function: RNA binding (GO:0003723);; Cellular Component: nucleolus (GO:0005730);;	K14820|2.2064e-91|cre:CHLREDRAFT_112251|K14820 ribosome biogenesis protein BRX1 | (RefSeq) hypothetical protein	[J]	Translation, ribosomal structure and biogenesis	Brix domain	Ribosome biogenesis protein BRX1 homolog 1 OS=Arabidopsis thaliana OX=3702 GN=BRIX1-1 PE=2 SV=1	J	Translation, ribosomal structure and biogenesis	hypothetical protein SPPG_03523 [Spizellomyces punctatus DAOM BR117]
c1026639.graph_c0	--	--	Molecular Function: nucleic acid binding (GO:0003676);; Molecular Function: metal ion binding (GO:0046872);;	--	[R]	General function prediction only	--	Protein indeterminate-domain 1 OS=Arabidopsis thaliana OX=3702 GN=IDD1 PE=1 SV=1	S	Function unknown	Zinc finger protein MAGPIE [Glycine soja]
c1026658.graph_c0	[R]	General function prediction only	Cellular Component: Golgi membrane (GO:0000139);; Cellular Component: endoplasmic reticulum membrane (GO:0005789);; Biological Process: ER to Golgi vesicle-mediated transport (GO:0006888);;	K07874|1.45403e-86|thj:104814064|K07874 Ras-related protein Rab-1A | (RefSeq) ras-related protein RABD2a-like	[TU]	--	Ras family;; Ras of Complex, Roc, domain of DAPkinase;; ADP-ribosylation factor family;; 50S ribosome-binding GTPase;; Gtr1/RagA G protein conserved region	Ras-related protein RIC1 OS=Oryza sativa subsp. japonica OX=39947 GN=RIC1 PE=2 SV=2	S	Function unknown	ras-related protein RIC1 [Aegilops tauschii subsp. tauschii]
c1026707.graph_c1	[J]	Translation, ribosomal structure and biogenesis	Molecular Function: structural constituent of ribosome (GO:0003735);; Biological Process: translation (GO:0006412);; Cellular Component: cytosolic small ribosomal subunit (GO:0022627);;	K02949|5.20231e-38|gsl:Gasu_61400|K02949 small subunit ribosomal protein S11e | (RefSeq) 40S ribosomal protein S11e	[J]	Translation, ribosomal structure and biogenesis	Ribosomal protein S17	40S ribosomal protein S11-2 OS=Arabidopsis thaliana OX=3702 GN=RPS11B PE=2 SV=2	J	Translation, ribosomal structure and biogenesis	hypothetical protein AURANDRAFT_21483 [Aureococcus anophagefferens]
c1026729.graph_c0	[R]	General function prediction only	Biological Process: transport (GO:0006810);; Cellular Component: endomembrane system (GO:0012505);; Cellular Component: membrane (GO:0016020);; Cellular Component: intracellular membrane-bounded organelle (GO:0043231);; Cellular Component: cytoplasmic part (GO:0044444);; Cellular Component: intracellular organelle part (GO:0044446);;	K07874|1.6255e-44|cre:CHLREDRAFT_60490|K07874 Ras-related protein Rab-1A | (RefSeq) RABD1; small rab-related GTPase	[TU]	--	Ras family;; Ras of Complex, Roc, domain of DAPkinase;; ADP-ribosylation factor family;; Gtr1/RagA G protein conserved region	GTP-binding protein YPTC1 OS=Chlamydomonas reinhardtii OX=3055 GN=YPTC1 PE=3 SV=1	S	Function unknown	hypothetical protein PAHAL_A02781 [Panicum hallii]
c1026751.graph_c0	--	--	--	--	[O]	Posttranslational modification, protein turnover, chaperones	CS domain	--	S	Function unknown	hypothetical protein COCMIDRAFT_4487 [Bipolaris oryzae ATCC 44560]
c1026760.graph_c0	--	--	Molecular Function: zinc ion binding (GO:0008270);;	--	--	--	--	--	S	Function unknown	PREDICTED: altered inheritance of mitochondria protein 3 [Glycine max]
c1026770.graph_c0	[O]	Posttranslational modification, protein turnover, chaperones	--	K00799|3.68241e-26|gsl:Gasu_27200|K00799 glutathione S-transferase [EC:2.5.1.18] | (RefSeq) glutathione S-transferase	[O]	Posttranslational modification, protein turnover, chaperones	Glutathione S-transferase, C-terminal domain;; Glutathione S-transferase, N-terminal domain;; Glutathione S-transferase, C-terminal domain;; Glutathione S-transferase, C-terminal domain	--	O	Posttranslational modification, protein turnover, chaperones	glutathione s-transferase pi [Pfiesteria piscicida]
c1026858.graph_c0	--	--	--	--	--	--	PH domain	--	T	Signal transduction mechanisms	--
c1026866.graph_c0	--	--	Molecular Function: nucleotide binding (GO:0000166);; Biological Process: phospholipid transport (GO:0015914);; Cellular Component: membrane (GO:0016020);; Molecular Function: hydrolase activity (GO:0016787);; Molecular Function: metal ion binding (GO:0046872);;	--	[P]	Inorganic ion transport and metabolism	Phospholipid-translocating ATPase N-terminal	Phospholipid-transporting ATPase 2 OS=Arabidopsis thaliana OX=3702 GN=ALA2 PE=1 SV=1	P	Inorganic ion transport and metabolism	PREDICTED: phospholipid-transporting ATPase 2-like [Malus domestica]
c1026873.graph_c0	--	--	Biological Process: translational initiation (GO:0006413);; Cellular Component: macromolecular complex (GO:0032991);; Cellular Component: cytoplasmic part (GO:0044444);;	K03249|1.26434e-33|sot:102586073|K03249 translation initiation factor 3 subunit F | (RefSeq) eukaryotic translation initiation factor 3 subunit F	[J]	Translation, ribosomal structure and biogenesis	JAB1/Mov34/MPN/PAD-1 ubiquitin protease	Eukaryotic translation initiation factor 3 subunit F OS=Arabidopsis thaliana OX=3702 GN=TIF3F1 PE=1 SV=1	S	Function unknown	Mov34-domain-containing protein [Mortierella elongata AG-77]
c1026881.graph_c0	[K]	Transcription	Biological Process: mRNA splicing, via spliceosome (GO:0000398);; Molecular Function: RNA binding (GO:0003723);; Cellular Component: spliceosomal complex (GO:0005681);; Cellular Component: small nucleolar ribonucleoprotein complex (GO:0005732);;	K11098|4.64815e-41|egr:104435957|K11098 small nuclear ribonucleoprotein F | (RefSeq) probable small nuclear ribonucleoprotein F	[A]	RNA processing and modification	LSM domain	Probable small nuclear ribonucleoprotein F OS=Arabidopsis thaliana OX=3702 GN=At4g30220 PE=3 SV=1	K	Transcription	PREDICTED: probable small nuclear ribonucleoprotein F [Ipomoea nil]
c1026899.graph_c0	--	--	--	--	--	--	Cofilin/tropomyosin-type actin-binding protein	--	--	--	hypothetical protein [Cryptococcus neoformans var. neoformans JEC21]
c1026900.graph_c1	--	--	Cellular Component: intracellular organelle (GO:0043229);;	K05758|3.00287e-23|mtr:MTR_8g070640|K05758 actin related protein 2/3 complex, subunit 2 | (RefSeq) Arp2/3 complex 34 kDa subunit	[Z]	Cytoskeleton	Arp2/3 complex, 34 kD subunit p34-Arc	Actin-related protein 2/3 complex subunit 2A OS=Arabidopsis thaliana OX=3702 GN=ARPC2A PE=1 SV=1	S	Function unknown	P34-Arc-domain-containing protein [Meliniomyces variabilis F]
c1026954.graph_c0	--	--	--	--	--	--	Protein of unknown function (DUF2615)	--	S	Function unknown	--
c1027073.graph_c0	[R]	General function prediction only	Cellular Component: mitochondrion (GO:0005739);; Cellular Component: membrane (GO:0016020);;	--	--	--	Bacterial transferase hexapeptide (six repeats)	Gamma carbonic anhydrase-like 2, mitochondrial OS=Arabidopsis thaliana OX=3702 GN=GAMMACAL2 PE=1 SV=1	S	Function unknown	unnamed protein product [Albugo candida]
c1027094.graph_c0	[M]	Cell wall/membrane/envelope biogenesis	Cellular Component: integral component of membrane (GO:0016021);;	--	--	--	--	--	S	Function unknown	hypothetical protein ACRE_049130 [Acremonium chrysogenum ATCC 11550]
c1027110.graph_c0	[K]	Transcription	--	--	--	--	Transcription elongation factor, GreA/GreB, C-term;; Transcription elongation factor, N-terminal	--	K	Transcription	transcription elongation factor GreA [Rhizophagus irregularis]
c1027122.graph_c0	[U]	Intracellular trafficking, secretion, and vesicular transport	--	--	--	--	Lysine-specific metallo-endopeptidase;; Putative peptidase family	--	S	Function unknown	hypothetical protein BOTBODRAFT_189398 [Botryobasidium botryosum FD-172 SS1]
c1027157.graph_c0	--	--	--	K11975|3.24578e-15|gra:105771368|K11975 E3 ubiquitin-protein ligase RNF144 [EC:2.3.2.27] | (RefSeq) probable E3 ubiquitin-protein ligase RNF144A-B	[O]	Posttranslational modification, protein turnover, chaperones	Zinc finger, C3HC4 type (RING finger);; IBR domain, a half RING-finger domain;; Zinc finger, C3HC4 type (RING finger);; Zinc finger, ZZ type	Probable E3 ubiquitin-protein ligase ARI9 OS=Arabidopsis thaliana OX=3702 GN=ARI9 PE=2 SV=1	S	Function unknown	hypothetical protein K432DRAFT_395346 [Lepidopterella palustris CBS 459.81]
c1027166.graph_c0	--	--	Cellular Component: intracellular (GO:0005622);;	K02918|2.62e-30|tcc:TCM_022019|K02918 large subunit ribosomal protein L35e | (RefSeq) Ribosomal L29 family protein	[J]	Translation, ribosomal structure and biogenesis	--	60S ribosomal protein L35-4 OS=Arabidopsis thaliana OX=3702 GN=RPL35D PE=2 SV=1	J	Translation, ribosomal structure and biogenesis	ribosomal protein L35 [Lobosporangium transversale]
c1027168.graph_c0	--	--	Biological Process: ribosomal small subunit assembly (GO:0000028);; Molecular Function: structural constituent of ribosome (GO:0003735);; Cellular Component: cytosolic small ribosomal subunit (GO:0022627);;	K02947|1.58956e-35|ppp:PHYPADRAFT_37614|K02947 small subunit ribosomal protein S10e | (RefSeq) hypothetical protein	[J]	Translation, ribosomal structure and biogenesis	Plectin/S10 domain	40S ribosomal protein S10-2 OS=Oryza sativa subsp. japonica OX=39947 GN=RPS10-2 PE=2 SV=1	J	Translation, ribosomal structure and biogenesis	hypothetical protein H310_12365 [Aphanomyces invadans]
c1027184.graph_c0	--	--	--	--	[T]	Signal transduction mechanisms	RhoGAP domain	Rho GTPase-activating protein 5 OS=Arabidopsis thaliana OX=3702 GN=ROPGAP5 PE=2 SV=1	S	Function unknown	hypothetical protein MUCCIDRAFT_18272, partial [Mucor circinelloides f. lusitanicus CBS 277.49]
c1027210.graph_c0	--	--	--	--	--	--	Polyketide cyclase / dehydrase and lipid transport	--	S	Function unknown	hypothetical protein O9G_000445 [Rozella allomycis CSF55]
c1027218.graph_c1	--	--	--	--	--	--	EF hand;; EF-hand domain;; EF-hand domain pair;; EF hand	--	--	--	--
c1027252.graph_c0	--	--	--	--	--	--	--	--	S	Function unknown	ARM repeat-containing protein [Rhizoclosmatium globosum]
c1027272.graph_c0	--	--	Molecular Function: binding (GO:0005488);; Biological Process: regulation of transcription, DNA-templated (GO:0006355);; Biological Process: histone acetylation (GO:0016573);;	--	--	--	--	--	K	Transcription	PREDICTED: myb-like protein I [Lupinus angustifolius]
c1027304.graph_c0	[O]	Posttranslational modification, protein turnover, chaperones	Cellular Component: membrane (GO:0016020);;	--	--	--	Isoprenylcysteine carboxyl methyltransferase (ICMT) family;; Phospholipid methyltransferase	--	U	Intracellular trafficking, secretion, and vesicular transport	hypothetical protein RirG_168900 [Rhizophagus irregularis DAOM 197198w]
c1027446.graph_c0	--	--	--	--	--	--	Ubiquinol-cytochrome-c reductase complex subunit (QCR10)	--	--	--	--
c1027497.graph_c0	--	--	--	--	--	--	--	--	--	--	predicted protein [Micromonas pusilla CCMP1545]
c1027545.graph_c0	[E]	Amino acid transport and metabolism	Molecular Function: 3-deoxy-7-phosphoheptulonate synthase activity (GO:0003849);; Biological Process: aromatic amino acid family biosynthetic process (GO:0009073);; Biological Process: chorismate biosynthetic process (GO:0009423);;	--	--	--	DAHP synthetase I family	--	E	Amino acid transport and metabolism	3-deoxy-7-phosphoheptulonate synthase ARO3 [Rhizophagus irregularis DAOM 197198w]
c1027575.graph_c0	--	--	--	--	--	--	--	--	S	Function unknown	hypothetical protein L916_08678 [Phytophthora parasitica]
c1027585.graph_c0	--	--	Cellular Component: proteasome complex (GO:0000502);;	K03032|1.79204e-162|sita:101768433|K03032 26S proteasome regulatory subunit N2 | (RefSeq) 26S proteasome non-ATPase regulatory subunit 1 homolog A-like	[O]	Posttranslational modification, protein turnover, chaperones	Proteasome/cyclosome repeat;; HEAT repeats;; HEAT repeat	26S proteasome non-ATPase regulatory subunit 1 homolog A OS=Arabidopsis thaliana OX=3702 GN=RPN2A PE=1 SV=1	O	Posttranslational modification, protein turnover, chaperones	26S proteasome regulatory complex, non-ATPase subcomplex, Rpn2/Psmd1 subunit, partial [Basidiobolus meristosporus CBS 931.73]
c1027620.graph_c0	--	--	--	--	--	--	Cut8, nuclear proteasome tether protein	--	--	--	--
c1027650.graph_c0	--	--	Molecular Function: transferase activity (GO:0016740);;	--	--	--	Poly(ADP-ribose) polymerase catalytic domain	--	S	Function unknown	poly ADP-ribose polymerase member 14-like protein [Chrysochromulina sp. CCMP291]
c1027656.graph_c0	--	--	--	--	--	--	Cation-independent mannose-6-phosphate receptor repeat	--	--	--	--
c1027664.graph_c0	--	--	--	--	--	--	Transmembrane protein	--	S	Function unknown	hypothetical protein SPPG_09416 [Spizellomyces punctatus DAOM BR117]
c1027747.graph_c0	[R]	General function prediction only	--	--	--	--	Hemerythrin HHE cation binding domain	--	S	Function unknown	hypothetical protein RhiirA4_408348 [Rhizophagus irregularis]
c1027748.graph_c0	--	--	--	--	--	--	60s Acidic ribosomal protein	--	--	--	--
c1027788.graph_c0	[J]	Translation, ribosomal structure and biogenesis	Molecular Function: mRNA binding (GO:0003729);; Molecular Function: structural constituent of ribosome (GO:0003735);; Biological Process: translation (GO:0006412);; Cellular Component: cytosolic small ribosomal subunit (GO:0022627);;	K02976|6.84363e-48|spen:107015725|K02976 small subunit ribosomal protein S26e | (RefSeq) 40S ribosomal protein S26-3-like	[J]	Translation, ribosomal structure and biogenesis	Ribosomal protein S26e	40S ribosomal protein S26-1 OS=Arabidopsis thaliana OX=3702 GN=RPS26A PE=2 SV=2	J	Translation, ribosomal structure and biogenesis	40S ribosomal protein S26 [Spizellomyces punctatus DAOM BR117]
c1027841.graph_c0	[J]	Translation, ribosomal structure and biogenesis	Biological Process: ribosomal large subunit assembly (GO:0000027);; Molecular Function: nucleotide binding (GO:0000166);; Molecular Function: structural constituent of ribosome (GO:0003735);; Biological Process: translation (GO:0006412);; Cellular Component: cytosolic large ribosomal subunit (GO:0022625);;	K02893|7.30038e-15|cit:102630069|K02893 large subunit ribosomal protein L23Ae | (RefSeq) 60S ribosomal protein L23a	[J]	Translation, ribosomal structure and biogenesis	Ribosomal protein L23	60S ribosomal protein L23a OS=Daucus carota OX=4039 GN=RPL23A PE=2 SV=1	J	Translation, ribosomal structure and biogenesis	ribosomal protein L23/L15e core domain-containing protein [Absidia repens]
c1027841.graph_c1	--	--	Biological Process: ribosomal large subunit assembly (GO:0000027);; Molecular Function: nucleotide binding (GO:0000166);; Molecular Function: structural constituent of ribosome (GO:0003735);; Biological Process: translation (GO:0006412);; Cellular Component: cytosolic large ribosomal subunit (GO:0022625);;	K02893|1.76085e-21|vra:106756341|K02893 large subunit ribosomal protein L23Ae | (RefSeq) 60S ribosomal protein L23a-like	[J]	Translation, ribosomal structure and biogenesis	Ribosomal protein L23, N-terminal domain	60S ribosomal protein L23A OS=Fritillaria agrestis OX=64177 GN=RPL23A PE=2 SV=1	J	Translation, ribosomal structure and biogenesis	ribosomal protein L23/L15e core domain-containing protein [Syncephalastrum racemosum]
c1027925.graph_c0	[J]	Translation, ribosomal structure and biogenesis	Biological Process: ribosomal small subunit assembly (GO:0000028);; Molecular Function: structural constituent of ribosome (GO:0003735);; Biological Process: translation (GO:0006412);; Cellular Component: cytosolic small ribosomal subunit (GO:0022627);;	K02966|2.13151e-48|cre:CHLREDRAFT_141798|K02966 small subunit ribosomal protein S19e | (RefSeq) RPS19; ribosomal protein S19, component of cytosolic 80S ribosome and 40S small subunit	[J]	Translation, ribosomal structure and biogenesis	Ribosomal protein S19e	40S ribosomal protein S19-1 OS=Arabidopsis thaliana OX=3702 GN=RPS19A PE=2 SV=1	J	Translation, ribosomal structure and biogenesis	putative 40S ribosomal protein S19 [Fragilariopsis cylindrus CCMP1102]
c1027937.graph_c0	--	--	--	--	--	--	--	--	S	Function unknown	--
c1027939.graph_c0	[J]	Translation, ribosomal structure and biogenesis	Cellular Component: intracellular part (GO:0044424);;	K02895|1.54882e-26|sita:101783049|K02895 large subunit ribosomal protein L24 | (RefSeq) 50S ribosomal protein L24-like	[J]	Translation, ribosomal structure and biogenesis	Ribosomal proteins 50S L24/mitochondrial 39S L24;; KOW motif	--	J	Translation, ribosomal structure and biogenesis	Ribosomal protein L24 [Blastocystis hominis]
c1027991.graph_c0	[E]	Amino acid transport and metabolism	Cellular Component: membrane (GO:0016020);; Molecular Function: transmembrane transporter activity (GO:0022857);;	K03294|2.02367e-70|sind:105175781|K03294 basic amino acid/polyamine antiporter, APA family | (RefSeq) cationic amino acid transporter 1-like	[E]	Amino acid transport and metabolism	Amino acid permease;; Amino acid permease;; C-terminus of AA_permease;; Spore germination protein	Cationic amino acid transporter 5 OS=Arabidopsis thaliana OX=3702 GN=CAT5 PE=1 SV=1	E	Amino acid transport and metabolism	Amino acid permease [Paramicrosporidium saccamoebae]
c1027991.graph_c1	[C]	Energy production and conversion	Cellular Component: mitochondrial inner membrane (GO:0005743);; Molecular Function: ubiquinol-cytochrome-c reductase activity (GO:0008121);; Biological Process: cellular respiration (GO:0045333);; Molecular Function: metal ion binding (GO:0046872);; Molecular Function: 2 iron, 2 sulfur cluster binding (GO:0051537);; Cellular Component: respiratory chain (GO:0070469);; Biological Process: hydrogen…	K00411|2.10421e-64|cme:CYME_CMN203C|K00411 ubiquinol-cytochrome c reductase iron-sulfur subunit [EC:1.10.2.2] | (RefSeq) cytochrome c reductase Rieske iron-sulfur subunit	[C]	Energy production and conversion	Rieske [2Fe-2S] domain	Cytochrome b-c1 complex subunit Rieske, mitochondrial OS=Zea mays OX=4577 PE=2 SV=1	C	Energy production and conversion	Rieske [2Fe-2S] iron-sulfur domain-containing protein [Catenaria anguillulae PL171]
c1027992.graph_c1	[J]	Translation, ribosomal structure and biogenesis	Molecular Function: nucleotide binding (GO:0000166);;	K03234|5.48671e-131|gsl:Gasu_50880|K03234 elongation factor 2 | (RefSeq) elongation factor EF-2	[J]	Translation, ribosomal structure and biogenesis	Elongation factor G, domain IV;; Elongation factor G C-terminus;; Elongation Factor G, domain II	Elongation factor 2 OS=Arabidopsis thaliana OX=3702 GN=LOS1 PE=1 SV=1	J	Translation, ribosomal structure and biogenesis	putative elongation factor [Chaetomium thermophilum var. thermophilum DSM 1495]
c1027992.graph_c2	[J]	Translation, ribosomal structure and biogenesis	Molecular Function: nucleotide binding (GO:0000166);; Molecular Function: GTPase activity (GO:0003924);; Cellular Component: intracellular (GO:0005622);; Biological Process: translation (GO:0006412);;	K03234|2.17571e-123|smo:SELMODRAFT_406141|K03234 elongation factor 2 | (RefSeq) hypothetical protein	[J]	Translation, ribosomal structure and biogenesis	Elongation factor Tu GTP binding domain;; Elongation factor Tu domain 2	Elongation factor 2 OS=Blastocystis hominis OX=12968 PE=2 SV=1	J	Translation, ribosomal structure and biogenesis	EF2, translation elongation factor 2 [Ectocarpus siliculosus]
c1028060.graph_c0	--	--	Biological Process: transport (GO:0006810);; Cellular Component: membrane (GO:0016020);; Cellular Component: intracellular membrane-bounded organelle (GO:0043231);; Cellular Component: cytoplasmic part (GO:0044444);;	K08515|1.35606e-11|gsl:Gasu_06340|K08515 vesicle-associated membrane protein 7 | (RefSeq) vesicle-associated membrane protein 7	[U]	Intracellular trafficking, secretion, and vesicular transport	Synaptobrevin	Vesicle-associated membrane protein 713 OS=Arabidopsis thaliana OX=3702 GN=VAMP713 PE=2 SV=1	U	Intracellular trafficking, secretion, and vesicular transport	vesicle-associated membrane protein 7 [Galdieria sulphuraria]
c1028073.graph_c1	--	--	Cellular Component: vacuolar membrane (GO:0005774);; Cellular Component: proton-transporting two-sector ATPase complex, catalytic domain (GO:0033178);;	K02150|2.26077e-42|nnu:104588373|K02150 V-type H+-transporting ATPase subunit E | (RefSeq) V-type proton ATPase subunit E-like	[C]	Energy production and conversion	ATP synthase (E/31 kDa) subunit	V-type proton ATPase subunit E OS=Citrus limon OX=2708 GN=VATE PE=2 SV=1	C	Energy production and conversion	hypothetical protein BATDEDRAFT_35129 [Batrachochytrium dendrobatidis JAM81]
c1028094.graph_c1	[H]	Coenzyme transport and metabolism	Molecular Function: adenosylhomocysteinase activity (GO:0004013);; Cellular Component: cytosol (GO:0005829);; Biological Process: S-adenosylmethionine cycle (GO:0033353);;	K01251|1.44727e-153|gsl:Gasu_07910|K01251 adenosylhomocysteinase [EC:3.3.1.1] | (RefSeq) adenosylhomocysteinase	[H]	Coenzyme transport and metabolism	S-adenosyl-L-homocysteine hydrolase, NAD binding domain;; S-adenosyl-L-homocysteine hydrolase	Adenosylhomocysteinase OS=Catharanthus roseus OX=4058 GN=SAHH PE=2 SV=1	H	Coenzyme transport and metabolism	adenosylhomocysteinase [Galdieria sulphuraria]
c1028183.graph_c0	--	--	--	--	--	--	WW domain	--	--	--	--
c1028221.graph_c0	[T]	Signal transduction mechanisms	--	--	[M]	Cell wall/membrane/envelope biogenesis	Ankyrin repeats (3 copies);; Ankyrin repeat;; Ankyrin repeats (many copies);; Ankyrin repeats (many copies);; Ankyrin repeat	Ankyrin repeat-containing protein At5g02620 OS=Arabidopsis thaliana OX=3702 GN=At5g02620 PE=1 SV=1	S	Function unknown	ankyrin repeat protein [Colletotrichum incanum]
c1028227.graph_c0	[O]	Posttranslational modification, protein turnover, chaperones	Molecular Function: nucleotide binding (GO:0000166);; Cellular Component: endoplasmic reticulum (GO:0005783);;	K09490|1.74e-52|gsl:Gasu_17030|K09490 heat shock 70kDa protein 5 | (RefSeq) molecular chaperone DnaK	[O]	Posttranslational modification, protein turnover, chaperones	Hsp70 protein	Luminal-binding protein 1 (Fragment) OS=Nicotiana tabacum OX=4097 GN=BIP1 PE=2 SV=1	O	Posttranslational modification, protein turnover, chaperones	luminal-binding protein 3, partial [Dendrobium catenatum]
c1028227.graph_c1	[O]	Posttranslational modification, protein turnover, chaperones	Molecular Function: ATP binding (GO:0005524);;	K09490|1.59533e-104|csl:COCSUDRAFT_64083|K09490 heat shock 70kDa protein 5 | (RefSeq) binding protein 1	[O]	Posttranslational modification, protein turnover, chaperones	--	Luminal-binding protein 5 OS=Nicotiana tabacum OX=4097 GN=BIP5 PE=2 SV=1	O	Posttranslational modification, protein turnover, chaperones	hypothetical protein GPECTOR_121g437 [Gonium pectorale]
c1028227.graph_c2	[O]	Posttranslational modification, protein turnover, chaperones	Molecular Function: nucleotide binding (GO:0000166);; Cellular Component: endoplasmic reticulum (GO:0005783);; Cellular Component: membrane (GO:0016020);;	K09490|5.34175e-60|crb:CARUB_v100044651m|K09490 heat shock 70kDa protein 5 | (RefSeq) hypothetical protein	[O]	Posttranslational modification, protein turnover, chaperones	--	Luminal-binding protein 5 OS=Nicotiana tabacum OX=4097 GN=BIP5 PE=2 SV=1	O	Posttranslational modification, protein turnover, chaperones	hypothetical protein AXX17_AT5G28890 [Arabidopsis thaliana]
c1028242.graph_c0	[J]	Translation, ribosomal structure and biogenesis	Molecular Function: organic cyclic compound binding (GO:0097159);; Molecular Function: heterocyclic compound binding (GO:1901363);;	K13195|3.56296e-19|nnu:104607624|K13195 cold-inducible RNA-binding protein | (RefSeq) glycine-rich RNA-binding protein 4, mitochondrial-like	[R]	General function prediction only	RNA recognition motif. (a.k.a. RRM, RBD, or RNP domain)	Small RNA-binding protein 11, chloroplastic OS=Arabidopsis thaliana OX=3702 GN=S-RBP11 PE=2 SV=1	S	Function unknown	hypothetical protein GLOIN_2v1441507, partial [Rhizophagus irregularis DAOM 181602=DAOM 197198]
c1028291.graph_c0	--	--	--	--	--	--	--	--	--	--	senescence-associated protein-like, partial [Pfiesteria piscicida]
c1028320.graph_c0	[J]	Translation, ribosomal structure and biogenesis	Molecular Function: structural constituent of ribosome (GO:0003735);; Biological Process: translation (GO:0006412);; Cellular Component: cytosolic large ribosomal subunit (GO:0022625);; Molecular Function: large ribosomal subunit rRNA binding (GO:0070180);;	K02894|2.35521e-71|ppp:PHYPADRAFT_197002|K02894 large subunit ribosomal protein L23e | (RefSeq) hypothetical protein	[J]	Translation, ribosomal structure and biogenesis	Ribosomal protein L14p/L23e	60S ribosomal protein L23 OS=Arabidopsis thaliana OX=3702 GN=RPL23A PE=2 SV=3	J	Translation, ribosomal structure and biogenesis	hypothetical protein BU14_0419s0007 [Porphyra umbilicalis]
c1028360.graph_c0	--	--	--	--	--	--	--	--	--	--	hypothetical protein AMATHDRAFT_45569 [Amanita thiersii Skay4041]
c1028381.graph_c0	--	--	Molecular Function: binding (GO:0005488);;	--	--	--	Helix-loop-helix DNA-binding domain	Transcription factor UNE10 OS=Arabidopsis thaliana OX=3702 GN=UNE10 PE=2 SV=1	S	Function unknown	hypothetical protein M569_07148, partial [Genlisea aurea]
c1028407.graph_c0	[C]	Energy production and conversion	--	--	--	--	Copper binding proteins, plastocyanin/azurin family	--	C	Energy production and conversion	Cupredoxin [Gonapodya prolifera JEL478]
c1028422.graph_c0	[R]	General function prediction only	Molecular Function: GTP binding (GO:0005525);; Cellular Component: intracellular (GO:0005622);; Biological Process: small GTPase mediated signal transduction (GO:0007264);;	--	[U]	Intracellular trafficking, secretion, and vesicular transport	Ras family;; Ras of Complex, Roc, domain of DAPkinase	Ras-related protein YPTC6 OS=Chlamydomonas reinhardtii OX=3055 GN=YPTC6 PE=3 SV=1	S	Function unknown	Ras-related protein Rab-11A [Bifiguratus adelaidae]
c1028427.graph_c0	--	--	--	--	--	--	YABBY protein;; Coiled-coil domain-containing protein 124	--	--	--	--
c1028457.graph_c0	--	--	--	--	[O]	Posttranslational modification, protein turnover, chaperones	Eukaryotic aspartyl protease;; Xylanase inhibitor N-terminal;; Xylanase inhibitor C-terminal	Aspartic proteinase-like protein 2 OS=Arabidopsis thaliana OX=3702 GN=At1g65240 PE=1 SV=2	O	Posttranslational modification, protein turnover, chaperones	hypothetical protein EMIHUDRAFT_197905 [Emiliania huxleyi CCMP1516]
c1028471.graph_c0	--	--	Molecular Function: organic cyclic compound binding (GO:0097159);; Molecular Function: heterocyclic compound binding (GO:1901363);;	K13095|1.23212e-75|ppp:PHYPADRAFT_189930|K13095 splicing factor 1 | (RefSeq) hypothetical protein	[A]	RNA processing and modification	Splicing factor 1 helix-hairpin domain;; KH domain	Splicing factor-like protein 1 OS=Arabidopsis thaliana OX=3702 GN=SF1 PE=1 SV=1	A	RNA processing and modification	predicted protein [Physcomitrella patens]
c1028473.graph_c0	[EH]	--	Molecular Function: catalytic activity (GO:0003824);;	K00953|2.27819e-41|cvr:CHLNCDRAFT_28612|K00953 FAD synthetase [EC:2.7.7.2] | (RefSeq) hypothetical protein	[EH]	--	Phosphoadenosine phosphosulfate reductase family	--	P	Inorganic ion transport and metabolism	adenine nucleotide alpha hydrolases-like protein [Basidiobolus meristosporus CBS 931.73]
c1028493.graph_c1	[NUW]	--	--	--	--	--	Type II secretion system (T2SS), protein F	--	--	--	--
c1028523.graph_c0	[IQR]	--	--	--	[R]	General function prediction only	Enoyl-(Acyl carrier protein) reductase;; short chain dehydrogenase;; KR domain	Glucose and ribitol dehydrogenase homolog OS=Oryza sativa subsp. japonica OX=39947 GN=Os05g0140800 PE=2 SV=2	S	Function unknown	short-chain dehydrogenase/reductase SDR [Sporothrix schenckii 1099-18]
c1028523.graph_c1	[I]	Lipid transport and metabolism	--	--	[I]	Lipid transport and metabolism	Acyl CoA binding protein	Acyl-CoA-binding domain-containing protein 2 OS=Oryza sativa subsp. japonica OX=39947 GN=ACBP2 PE=1 SV=1	I	Lipid transport and metabolism	Acyl-CoA-binding protein [Auxenochlorella protothecoides]
c1028545.graph_c0	--	--	Biological Process: metal ion transport (GO:0030001);; Molecular Function: metal ion binding (GO:0046872);;	--	--	--	Heavy-metal-associated domain	Heavy metal-associated isoprenylated plant protein 47 OS=Arabidopsis thaliana OX=3702 GN=HIPP47 PE=3 SV=1	S	Function unknown	heavy metal-associated isoprenylated plant protein 47 [Vigna radiata var. radiata]
c1028552.graph_c0	--	--	Molecular Function: protein binding (GO:0005515);; Biological Process: actin filament organization (GO:0007015);; Biological Process: cellular component assembly (GO:0022607);; Cellular Component: cytoplasmic part (GO:0044444);; Biological Process: biological regulation (GO:0065007);; Cellular Component: cell periphery (GO:0071944);;	K05759|1.27296e-21|mpp:MICPUCDRAFT_16052|K05759 profilin | (RefSeq) PRO; profilin	[Z]	Cytoskeleton	Profilin	Profilin OS=Helianthus annuus OX=4232 PE=1 SV=1	O	Posttranslational modification, protein turnover, chaperones	profilin [Mortierella elongata AG-77]
c1028554.graph_c0	[I]	Lipid transport and metabolism	Biological Process: single-organism process (GO:0044699);;	K08762|3.18417e-15|bna:106382012|K08762 diazepam-binding inhibitor (GABA receptor modulator, acyl-CoA-binding protein) | (RefSeq) acyl-CoA-binding protein-like	[I]	Lipid transport and metabolism	Acyl CoA binding protein	Acyl-CoA-binding protein OS=Brassica napus OX=3708 PE=3 SV=1	I	Lipid transport and metabolism	hypothetical protein LRAMOSA04565 [Lichtheimia ramosa]
c1028567.graph_c0	--	--	--	K12868|1.33994e-16|osa:4342038|K12868 pre-mRNA-splicing factor SYF2 | (RefSeq) OJ1663_H12.6; pre-mRNA-splicing factor syf2	[DA]	--	SYF2 splicing factor	--	A	RNA processing and modification	SYF2-domain-containing protein [Basidiobolus meristosporus CBS 931.73]
c1028571.graph_c1	--	--	Biological Process: ribosomal small subunit assembly (GO:0000028);; Molecular Function: structural constituent of ribosome (GO:0003735);; Cellular Component: cytosolic small ribosomal subunit (GO:0022627);;	K02947|3.53824e-35|mus:103979109|K02947 small subunit ribosomal protein S10e | (RefSeq) 40S ribosomal protein S10-1	[J]	Translation, ribosomal structure and biogenesis	Plectin/S10 domain	40S ribosomal protein S10-2 OS=Oryza sativa subsp. japonica OX=39947 GN=RPS10-2 PE=2 SV=1	J	Translation, ribosomal structure and biogenesis	hypothetical protein AURANDRAFT_29821, partial [Aureococcus anophagefferens]
c1028583.graph_c0	--	--	--	K03259|3.83933e-22|ppp:PHYPADRAFT_113199|K03259 translation initiation factor 4E | (RefSeq) hypothetical protein	[J]	Translation, ribosomal structure and biogenesis	Eukaryotic initiation factor 4E	Eukaryotic translation initiation factor isoform 4E-2 OS=Zea mays OX=4577 PE=2 SV=1	J	Translation, ribosomal structure and biogenesis	eukaryotic initiation factor 4E putative [Albugo laibachii Nc14]
c1028592.graph_c0	--	--	--	--	--	--	--	--	S	Function unknown	hypothetical protein SELMODRAFT_164732 [Selaginella moellendorffii]
c1028597.graph_c0	--	--	Cellular Component: nucleus (GO:0005634);; Biological Process: regulation of transcription, DNA-templated (GO:0006355);; Molecular Function: sequence-specific DNA binding (GO:0043565);; Molecular Function: protein heterodimerization activity (GO:0046982);;	K08065|3.34655e-54|smo:SELMODRAFT_450037|K08065 nuclear transcription Y subunit beta | (RefSeq) SmHAP3D-1.2, SmHAP3D-1; CCAAT-box binding factor HAP3	[K]	Transcription	Histone-like transcription factor (CBF/NF-Y) and archaeal histone	Nuclear transcription factor Y subunit B-3 OS=Arabidopsis thaliana OX=3702 GN=NFYB3 PE=1 SV=1	B	Chromatin structure and dynamics	nuclear transcription factor Y subunit B-3 [Phytophthora infestans T30-4]
c1028600.graph_c0	[R]	General function prediction only	Molecular Function: nitronate monooxygenase activity (GO:0018580);; Molecular Function: dioxygenase activity (GO:0051213);; Biological Process: oxidation-reduction process (GO:0055114);;	--	--	--	Nitronate monooxygenase;; IMP dehydrogenase / GMP reductase domain	--	S	Function unknown	hypothetical protein BATDEDRAFT_85176 [Batrachochytrium dendrobatidis JAM81]
c1028601.graph_c0	[J]	Translation, ribosomal structure and biogenesis	Biological Process: metabolic process (GO:0008152);; Molecular Function: oxidoreductase activity (GO:0016491);;	K05542|1.44224e-42|bna:106366303|K05542 tRNA-dihydrouridine synthase 1 [EC:1.3.1.88] | (RefSeq) tRNA-dihydrouridine(16/17) synthase [NAD(P)(+)]-like	[U]	Intracellular trafficking, secretion, and vesicular transport	Dihydrouridine synthase (Dus)	Transmembrane emp24 domain-containing protein p24delta4 OS=Arabidopsis thaliana OX=3702 GN=CYB PE=1 SV=1	U	Intracellular trafficking, secretion, and vesicular transport	unnamed protein product [Albugo candida]
c1028618.graph_c0	--	--	--	--	--	--	--	--	S	Function unknown	hypothetical protein [Parasitella parasitica]
c1028620.graph_c0	--	--	--	--	[TZ]	--	RhoGAP domain;; Divergent CRAL/TRIO domain;; CRAL/TRIO domain	Uncharacterized Rho GTPase-activating protein At5g61530 OS=Arabidopsis thaliana OX=3702 GN=At5g61530 PE=1 SV=2	S	Function unknown	CDC42 rho GTPase-activating protein [Peniophora sp. CONT]
c1028682.graph_c0	[T]	Signal transduction mechanisms	--	K18045|1.02629e-43|atr:18424859|K18045 tyrosine-protein phosphatase SIW14 [EC:3.1.3.48] | (RefSeq) probable tyrosine-protein phosphatase At1g05000	[V]	Defense mechanisms	Tyrosine phosphatase family;; Tyrosine phosphatase family	Tyrosine-protein phosphatase DSP1 OS=Arabidopsis thaliana OX=3702 GN=DSP1 PE=1 SV=1	T	Signal transduction mechanisms	hypothetical protein AQUCO_02800038v1 [Aquilegia coerulea]
c1028687.graph_c0	[M]	Cell wall/membrane/envelope biogenesis	--	--	[T]	Signal transduction mechanisms	Protein kinase domain;; Protein tyrosine kinase;; Kinase-like;; Phosphotransferase enzyme family	CBL-interacting protein kinase 32 OS=Oryza sativa subsp. japonica OX=39947 GN=CIPK32 PE=2 SV=2	T	Signal transduction mechanisms	kinase-like protein [Basidiobolus meristosporus CBS 931.73]
c1028693.graph_c0	[O]	Posttranslational modification, protein turnover, chaperones	--	K04097|2.77011e-39|ccp:CHC_T00008810001|K04097 prostaglandin-H2 D-isomerase / glutathione transferase [EC:5.3.99.2 2.5.1.18] | (RefSeq) Glutathione S-transferase	[O]	Posttranslational modification, protein turnover, chaperones	Glutathione S-transferase, C-terminal domain;; Glutathione S-transferase, C-terminal domain;; Glutathione S-transferase, N-terminal domain;; Glutathione S-transferase, C-terminal domain	--	O	Posttranslational modification, protein turnover, chaperones	hypothetical protein PHYSODRAFT_554350 [Phytophthora sojae]
c1028693.graph_c1	[O]	Posttranslational modification, protein turnover, chaperones	--	K04097|9.48649e-19|ccp:CHC_T00008810001|K04097 prostaglandin-H2 D-isomerase / glutathione transferase [EC:5.3.99.2 2.5.1.18] | (RefSeq) Glutathione S-transferase	[O]	Posttranslational modification, protein turnover, chaperones	--	--	O	Posttranslational modification, protein turnover, chaperones	hypothetical protein L915_16064 [Phytophthora parasitica]
c1028697.graph_c0	[J]	Translation, ribosomal structure and biogenesis	Molecular Function: structural constituent of ribosome (GO:0003735);; Biological Process: translation (GO:0006412);; Cellular Component: large ribosomal subunit (GO:0015934);;	K02880|9.01154e-59|sbi:SORBI_01g001600|K02880 large subunit ribosomal protein L17e | (RefSeq) SORBIDRAFT_01g001600, Sb01g001600; hypothetical protein	[J]	Translation, ribosomal structure and biogenesis	Ribosomal protein L22p/L17e	60S ribosomal protein L17 OS=Zea mays OX=4577 GN=RPL17 PE=2 SV=1	J	Translation, ribosomal structure and biogenesis	50S ribosomal protein L22 [Hesseltinella vesiculosa]
c1028699.graph_c0	--	--	--	--	[S]	Function unknown	PQ loop repeat	--	S	Function unknown	hypothetical protein RirG_134210 [Rhizophagus irregularis DAOM 197198w]
c1028701.graph_c0	--	--	--	--	[S]	Function unknown	N-terminal domain of CBF1 interacting co-repressor CIR;; Pre-mRNA splicing factor	--	S	Function unknown	PREDICTED: pre-mRNA-splicing factor CWC25 homolog [Cicer arietinum]
c1028707.graph_c0	--	--	Molecular Function: structural constituent of ribosome (GO:0003735);; Biological Process: translation (GO:0006412);; Cellular Component: cytosolic large ribosomal subunit (GO:0022625);;	K02901|7.30944e-42|mtr:MTR_2g035930|K02901 large subunit ribosomal protein L27e | (RefSeq) 60S ribosomal protein L27-1	[J]	Translation, ribosomal structure and biogenesis	Ribosomal L27e protein family;; KOW motif	60S ribosomal protein L27-1 OS=Arabidopsis thaliana OX=3702 GN=RPL27A PE=2 SV=1	J	Translation, ribosomal structure and biogenesis	hypothetical protein BATDEDRAFT_26801 [Batrachochytrium dendrobatidis JAM81]
c1028714.graph_c0	--	--	Cellular Component: endoplasmic reticulum (GO:0005783);; Cellular Component: Golgi apparatus (GO:0005794);; Cellular Component: cis-Golgi network (GO:0005801);; Biological Process: retrograde vesicle-mediated transport, Golgi to ER (GO:0006890);;	--	[U]	Intracellular trafficking, secretion, and vesicular transport	Rer1 family	Protein RER1B OS=Arabidopsis thaliana OX=3702 GN=RER1B PE=1 SV=2	U	Intracellular trafficking, secretion, and vesicular transport	rer1a protein [Chrysochromulina sp. CCMP291]
c1028727.graph_c0	[J]	Translation, ribosomal structure and biogenesis	Molecular Function: structural constituent of ribosome (GO:0003735);; Cellular Component: ribosome (GO:0005840);; Biological Process: translation (GO:0006412);;	K02979|4.93478e-23|cme:CYME_CMO024C|K02979 small subunit ribosomal protein S28e | (RefSeq) 40S ribosomal protein S28	[J]	Translation, ribosomal structure and biogenesis	Ribosomal protein S28e	40S ribosomal protein S28 OS=Zea mays OX=4577 GN=RPS28 PE=3 SV=1	J	Translation, ribosomal structure and biogenesis	40S ribosomal protein S28 [Ectocarpus siliculosus]
c1028746.graph_c0	[F]	Nucleotide transport and metabolism	Molecular Function: nucleoside diphosphate kinase activity (GO:0004550);; Molecular Function: ATP binding (GO:0005524);; Cellular Component: intracellular (GO:0005622);; Biological Process: nucleoside diphosphate phosphorylation (GO:0006165);; Biological Process: GTP biosynthetic process (GO:0006183);; Biological Process: UTP biosynthetic process (GO:0006228);; Biological Process: CTP biosyntheti…	K00940|7.80428e-71|cit:102608035|K00940 nucleoside-diphosphate kinase [EC:2.7.4.6] | (RefSeq) nucleoside diphosphate kinase III, chloroplastic/mitochondrial-like	[F]	Nucleotide transport and metabolism	Nucleoside diphosphate kinase	Nucleoside diphosphate kinase 4, chloroplastic OS=Spinacia oleracea OX=3562 GN=NDK4 PE=1 SV=1	F	Nucleotide transport and metabolism	PREDICTED: nucleoside diphosphate kinase III, chloroplastic/mitochondrial-like [Citrus sinensis]
c1028747.graph_c1	--	--	Molecular Function: structural constituent of ribosome (GO:0003735);; Cellular Component: ribosome (GO:0005840);; Biological Process: translation (GO:0006412);;	K02883|2.01731e-33|vvi:100256800|K02883 large subunit ribosomal protein L18e | (RefSeq) 60S ribosomal protein L18-2	[J]	Translation, ribosomal structure and biogenesis	Ribosomal protein 60S L18 and 50S L18e	60S ribosomal protein L18 (Fragment) OS=Cicer arietinum OX=3827 GN=RPL18 PE=2 SV=1	J	Translation, ribosomal structure and biogenesis	ribosomal protein L18e [Rhizoclosmatium globosum]
c1028758.graph_c1	[J]	Translation, ribosomal structure and biogenesis	Molecular Function: structural constituent of ribosome (GO:0003735);; Cellular Component: ribosome (GO:0005840);; Biological Process: translation (GO:0006412);;	K02960|3.46518e-68|bvg:104902888|K02960 small subunit ribosomal protein S16e | (RefSeq) 40S ribosomal protein S16-like	[J]	Translation, ribosomal structure and biogenesis	Ribosomal protein S9/S16	40S ribosomal protein S16 OS=Gossypium hirsutum OX=3635 GN=RPS16 PE=2 SV=1	J	Translation, ribosomal structure and biogenesis	40S ribosomal protein S16 [Basidiobolus meristosporus CBS 931.73]
c1028782.graph_c0	--	--	Molecular Function: succinate dehydrogenase activity (GO:0000104);; Cellular Component: mitochondrial envelope (GO:0005740);; Biological Process: tricarboxylic acid cycle (GO:0006099);; Cellular Component: integral component of membrane (GO:0016021);;	K00237|2.98699e-21|bpg:Bathy01g05210|K00237 succinate dehydrogenase (ubiquinone) membrane anchor subunit | (RefSeq) hypothetical protein	--	--	CybS, succinate dehydrogenase cytochrome B small subunit	--	G	Carbohydrate transport and metabolism	Hypothetical protein PINS_003671 [Pythium insidiosum]
c1028826.graph_c0	--	--	--	--	--	--	Ribosome associated membrane protein RAMP4	--	--	--	--
c1028832.graph_c0	[C]	Energy production and conversion	--	--	--	--	Copper binding proteins, plastocyanin/azurin family	Plastocyanin OS=Scenedesmus fuscus OX=3073 GN=petE PE=1 SV=1	--	--	hypothetical protein BZG36_05770 [Bifiguratus adelaidae]
c1028849.graph_c0	[O]	Posttranslational modification, protein turnover, chaperones	--	--	--	--	Fascin domain;; FRG1-like domain;; Fibroblast growth factor;; Domain of unknown function (DUF569)	--	S	Function unknown	hypothetical protein CEUSTIGMA_g9550.t1 [Chlamydomonas eustigma]
c1028880.graph_c0	--	--	--	K03094|1.21079e-07|jcu:105647100|K03094 S-phase kinase-associated protein 1 | (RefSeq) SKP1-like protein 1B	[O]	Posttranslational modification, protein turnover, chaperones	Skp1 family, dimerisation domain	--	--	--	hypothetical protein M427DRAFT_28685 [Gonapodya prolifera JEL478]
c1029008.graph_c0	--	--	Cellular Component: intracellular organelle (GO:0043229);;	--	[DZ]	--	Translationally controlled tumour protein	Translationally-controlled tumor protein homolog OS=Solanum lycopersicum OX=4081 GN=TCTP PE=2 SV=1	S	Function unknown	translationally controlled tumor protein [Schizosaccharomyces octosporus yFS286]
c1029105.graph_c0	--	--	--	K03626|1.38206e-23|csv:101215535|K03626 nascent polypeptide-associated complex subunit alpha | (RefSeq) nascent polypeptide-associated complex subunit alpha-like protein 1	[K]	Transcription	NAC domain	Nascent polypeptide-associated complex subunit alpha-like protein 5 OS=Arabidopsis thaliana OX=3702 GN=At1g33040 PE=2 SV=2	K	Transcription	PREDICTED: nascent polypeptide-associated complex subunit alpha-like protein 1 [Cucumis melo]
c1029114.graph_c0	--	--	Molecular Function: binding (GO:0005488);;	--	[R]	General function prediction only	--	Protein SUPPRESSOR OF FRI 4 OS=Arabidopsis thaliana OX=3702 GN=SUF4 PE=1 SV=1	S	Function unknown	hypothetical protein GLOIN_2v1699537 [Rhizophagus irregularis DAOM 181602=DAOM 197198]
c1029117.graph_c1	[T]	Signal transduction mechanisms	Molecular Function: kinase activity (GO:0016301);;	K08794|1.5966e-76|vcn:VOLCADRAFT_79621|K08794 calcium/calmodulin-dependent protein kinase I [EC:2.7.11.17] | (RefSeq) hypothetical protein	[T]	Signal transduction mechanisms	Protein kinase domain;; Protein tyrosine kinase	Calcium-dependent protein kinase 14 OS=Arabidopsis thaliana OX=3702 GN=CPK14 PE=2 SV=1	T	Signal transduction mechanisms	CAMK/CAMK1 protein kinase [Saprolegnia parasitica CBS 223.65]
c1029143.graph_c0	[T]	Signal transduction mechanisms	--	--	--	--	TerD domain	--	T	Signal transduction mechanisms	PREDICTED: tellurium resistance protein TerZ [Ricinus communis]
c1029156.graph_c0	[S]	Function unknown	Cellular Component: membrane (GO:0016020);;	--	[R]	General function prediction only	Proteolipid membrane potential modulator	Hydrophobic protein LTI6B OS=Oryza sativa subsp. japonica OX=39947 GN=LTI6B PE=2 SV=1	S	Function unknown	Pmp3p [Rhizophagus irregularis DAOM 197198w]
c1029165.graph_c0	[O]	Posttranslational modification, protein turnover, chaperones	Molecular Function: ATP binding (GO:0005524);; Cellular Component: nucleus (GO:0005634);; Cellular Component: cytosol (GO:0005829);; Molecular Function: NEDD8 transferase activity (GO:0019788);; Biological Process: protein neddylation (GO:0045116);;	K10583|1.5702e-53|cvr:CHLNCDRAFT_56059|K10583 ubiquitin-conjugating enzyme E2 S [EC:2.3.2.23] | (RefSeq) hypothetical protein	[O]	Posttranslational modification, protein turnover, chaperones	Ubiquitin-conjugating enzyme	Ubiquitin-conjugating enzyme E2 22 OS=Arabidopsis thaliana OX=3702 GN=UBC22 PE=1 SV=1	O	Posttranslational modification, protein turnover, chaperones	Ubiquitin-conjugating enzyme E2 S, partial [Bifiguratus adelaidae]
c1029166.graph_c0	[J]	Translation, ribosomal structure and biogenesis	Molecular Function: structural constituent of ribosome (GO:0003735);; Cellular Component: ribosome (GO:0005840);; Biological Process: translation (GO:0006412);;	K02885|9.61998e-61|eus:EUTSA_v10026243mg|K02885 large subunit ribosomal protein L19e | (RefSeq) hypothetical protein	[J]	Translation, ribosomal structure and biogenesis	Ribosomal protein L19e	60S ribosomal protein L19-2 OS=Arabidopsis thaliana OX=3702 GN=RPL19B PE=2 SV=1	J	Translation, ribosomal structure and biogenesis	hypothetical protein K493DRAFT_294294 [Basidiobolus meristosporus CBS 931.73]
c1029197.graph_c1	--	--	Molecular Function: structural constituent of ribosome (GO:0003735);; Biological Process: rRNA processing (GO:0006364);; Biological Process: translation (GO:0006412);; Cellular Component: cytosolic small ribosomal subunit (GO:0022627);; Cellular Component: 90S preribosome (GO:0030686);; Cellular Component: small-subunit processome (GO:0032040);; Biological Process: ribosomal small subunit biogene…	K02993|3.1528e-41|olu:OSTLU_33586|K02993 small subunit ribosomal protein S7e | (RefSeq) RPS7; Ribosomal protein S7, component of cytosolic 80S ribosome and 40S small subunit	[J]	Translation, ribosomal structure and biogenesis	Ribosomal protein S7e	40S ribosomal protein S7-1 OS=Arabidopsis thaliana OX=3702 GN=RPS7A PE=2 SV=1	J	Translation, ribosomal structure and biogenesis	40S ribosomal protein S7 [Phytophthora megakarya]
c1029230.graph_c0	--	--	Molecular Function: nucleotide binding (GO:0000166);; Molecular Function: structural constituent of ribosome (GO:0003735);; Cellular Component: ribosome (GO:0005840);; Biological Process: translation (GO:0006412);;	K02901|9.68018e-44|ppp:PHYPADRAFT_194649|K02901 large subunit ribosomal protein L27e | (RefSeq) hypothetical protein	[J]	Translation, ribosomal structure and biogenesis	Ribosomal L27e protein family	60S ribosomal protein L27 OS=Pyrobotrys stellata OX=3064 GN=RPL27 PE=2 SV=1	J	Translation, ribosomal structure and biogenesis	ribosomal L27e protein family-domain-containing protein [Lobosporangium transversale]
c1029303.graph_c0	[G]	Carbohydrate transport and metabolism	--	--	--	--	Ricin-type beta-trefoil lectin domain-like;; Ricin-type beta-trefoil lectin domain	--	--	--	Beta-agarase AgaB34 [Tetrabaena socialis]
c1029349.graph_c0	--	--	--	--	[Z]	Cytoskeleton	Cofilin/tropomyosin-type actin-binding protein	--	S	Function unknown	ADF-like domain-containing protein [Gloeophyllum trabeum ATCC 11539]
c1029351.graph_c0	[T]	Signal transduction mechanisms	Cellular Component: membrane (GO:0016020);;	K06889|1.6398e-62|gsl:Gasu_59350|K06889 uncharacterized protein | (RefSeq) hydrolase	[R]	General function prediction only	Serine aminopeptidase, S33;; alpha/beta hydrolase fold;; BAAT / Acyl-CoA thioester hydrolase C terminal;; Dienelactone hydrolase family;; Phospholipase/Carboxylesterase;; Alpha/beta hydrolase family	Alpha/beta hydrolase domain-containing protein WAV2 OS=Arabidopsis thaliana OX=3702 GN=WAV2 PE=2 SV=1	S	Function unknown	hypothetical protein MUCCIDRAFT_153332 [Mucor circinelloides f. lusitanicus CBS 277.49]
c1029375.graph_c0	--	--	Biological Process: rRNA processing (GO:0006364);; Cellular Component: cytosolic small ribosomal subunit (GO:0022627);; Cellular Component: 90S preribosome (GO:0030686);; Cellular Component: small-subunit processome (GO:0032040);; Biological Process: ribosomal small subunit biogenesis (GO:0042274);;	K02993|2.60324e-24|vvi:100253080|K02993 small subunit ribosomal protein S7e | (RefSeq) 40S ribosomal protein S7	[J]	Translation, ribosomal structure and biogenesis	Ribosomal protein S7e	40S ribosomal protein S7 OS=Avicennia marina OX=82927 GN=RPS7 PE=2 SV=1	J	Translation, ribosomal structure and biogenesis	40S ribosomal protein S7 [Pythium insidiosum]
c1029430.graph_c0	[R]	General function prediction only	--	K09553|3.96816e-74|bpg:Bathy05g00560|K09553 stress-induced-phosphoprotein 1 | (RefSeq) hypothetical protein	[O]	Posttranslational modification, protein turnover, chaperones	Tetratricopeptide repeat;; Tetratricopeptide repeat;; Tetratricopeptide repeat;; TPR repeat;; Tetratricopeptide repeat;; Tetratricopeptide repeat;; Tetratricopeptide repeat;; Tetratricopeptide repeat;; Tetratricopeptide repeat;; Tetratricopeptide repeat;; Tetratricopeptide repeat	Hsp70-Hsp90 organizing protein OS=Triticum aestivum OX=4565 GN=HOP PE=1 SV=1	S	Function unknown	predicted protein [Bathycoccus prasinos]
c1029455.graph_c0	--	--	Cellular Component: proteasome complex (GO:0000502);; Biological Process: proteasome-mediated ubiquitin-dependent protein catabolic process (GO:0043161);;	K03038|1.72501e-126|ppp:PHYPADRAFT_193347|K03038 26S proteasome regulatory subunit N8 | (RefSeq) hypothetical protein	[O]	Posttranslational modification, protein turnover, chaperones	Maintenance of mitochondrial structure and function;; JAB1/Mov34/MPN/PAD-1 ubiquitin protease	26S proteasome non-ATPase regulatory subunit 7 homolog A OS=Arabidopsis thaliana OX=3702 GN=RPN8A PE=1 SV=1	S	Function unknown	26S proteasome non-ATPase regulatory subunit 7 [Pythium insidiosum]
c1029493.graph_c0	[C]	Energy production and conversion	--	--	[R]	General function prediction only	short chain dehydrogenase;; Enoyl-(Acyl carrier protein) reductase;; KR domain	3-oxoacyl-[acyl-carrier-protein] reductase 3, chloroplastic OS=Brassica napus OX=3708 GN=bkr3 PE=2 SV=1	S	Function unknown	short-chain dehydrogenase/reductase (SDR) family protein [Galdieria sulphuraria]
c1029497.graph_c1	[T]	Signal transduction mechanisms	Cellular Component: incipient cellular bud site (GO:0000131);; Biological Process: karyogamy involved in conjugation with cellular fusion (GO:0000742);; Cellular Component: hyphal tip (GO:0001411);; Molecular Function: calcium ion binding (GO:0005509);; Cellular Component: central plaque of spindle pole body (GO:0005823);; Cellular Component: cellular bud tip (GO:0005934);; Cellular Component: ce…	K02183|3.00886e-21|cvr:CHLNCDRAFT_59820|K02183 calmodulin | (RefSeq) hypothetical protein	[T]	Signal transduction mechanisms	EF hand;; EF-hand domain pair;; EF-hand domain;; EF-hand domain pair;; EF hand	Calmodulin OS=Macrocystis pyrifera OX=35122 PE=2 SV=3	DTZ	--	hypothetical protein NCAS_0I01100 [Naumovozyma castellii CBS 4309]
c1029500.graph_c0	[P]	Inorganic ion transport and metabolism	--	K01674|1.07292e-24|aip:107634120|K01674 carbonic anhydrase [EC:4.2.1.1] | (RefSeq) alpha carbonic anhydrase 7-like	[R]	General function prediction only	Eukaryotic-type carbonic anhydrase	Alpha carbonic anhydrase 5 OS=Arabidopsis thaliana OX=3702 GN=ACA5 PE=3 SV=1	P	Inorganic ion transport and metabolism	hypothetical protein RirG_261120 [Rhizophagus irregularis DAOM 197198w]
c1029526.graph_c0	[E]	Amino acid transport and metabolism	--	--	[E]	Amino acid transport and metabolism	Arginase family	--	E	Amino acid transport and metabolism	arginase [Wallemia mellicola CBS 633.66]
c1029528.graph_c1	--	--	Cellular Component: ribosome (GO:0005840);;	K02937|2.23785e-29|csl:COCSUDRAFT_20022|K02937 large subunit ribosomal protein L7e | (RefSeq) 60S ribosomal protein L7	[J]	Translation, ribosomal structure and biogenesis	Ribosomal L30 N-terminal domain;; Ribosomal protein L30p/L7e	60S ribosomal protein L7-4 OS=Arabidopsis thaliana OX=3702 GN=RPL7D PE=2 SV=1	J	Translation, ribosomal structure and biogenesis	Putative 50S ribosomal protein L7e [Rhizopus microsporus]
c1029547.graph_c0	--	--	--	--	--	--	--	--	--	--	BTB/POZ and TAZ domain-containing protein 4 isoform X1 [Cajanus cajan]
c1029565.graph_c0	[J]	Translation, ribosomal structure and biogenesis	Biological Process: maturation of SSU-rRNA from tricistronic rRNA transcript (SSU-rRNA, 5.8S rRNA, LSU-rRNA) (GO:0000462);; Cellular Component: cytosolic small ribosomal subunit (GO:0022627);;	K02974|6.73515e-38|apro:F751_2091|K02974 small subunit ribosomal protein S24e | (RefSeq) 40S ribosomal protein S24-2	[J]	Translation, ribosomal structure and biogenesis	Ribosomal protein S24e	40S ribosomal protein S24-2 OS=Arabidopsis thaliana OX=3702 GN=RPS24B PE=2 SV=2	J	Translation, ribosomal structure and biogenesis	40S ribosomal protein S24 [Zancudomyces culisetae]
c1029589.graph_c0	[J]	Translation, ribosomal structure and biogenesis	Cellular Component: nucleus (GO:0005634);;	K12837|1.26919e-63|smo:SELMODRAFT_160385|K12837 splicing factor U2AF 65 kDa subunit | (RefSeq) hypothetical protein	[A]	RNA processing and modification	RNA recognition motif. (a.k.a. RRM, RBD, or RNP domain);; RNA recognition motif	Splicing factor U2af large subunit A OS=Nicotiana plumbaginifolia OX=4092 GN=U2AF65A PE=2 SV=1	S	Function unknown	U2 snRNP auxilliary factor, large subunit, splicing factor [Spizellomyces punctatus DAOM BR117]
c1029625.graph_c0	[J]	Translation, ribosomal structure and biogenesis	Molecular Function: nucleotide binding (GO:0000166);; Molecular Function: serine-tRNA ligase activity (GO:0004828);; Cellular Component: cytoplasm (GO:0005737);; Biological Process: seryl-tRNA aminoacylation (GO:0006434);;	K01875|2.67768e-169|fve:101298334|K01875 seryl-tRNA synthetase [EC:6.1.1.11] | (RefSeq) serine--tRNA ligase	[J]	Translation, ribosomal structure and biogenesis	tRNA synthetase class II core domain (G, H, P, S and T);; Seryl-tRNA synthetase N-terminal domain	Serine--tRNA ligase OS=Helianthus annuus OX=4232 PE=2 SV=1	J	Translation, ribosomal structure and biogenesis	seryl-tRNA synthetase [Basidiobolus meristosporus CBS 931.73]
c1029637.graph_c0	[G]	Carbohydrate transport and metabolism	--	K00699|3.78024e-30|csl:COCSUDRAFT_65542|K00699 glucuronosyltransferase [EC:2.4.1.17] | (RefSeq) UDP-Glycosyltransferase/glycogen phosphorylase	[GC]	--	UDP-glucoronosyl and UDP-glucosyl transferase;; Glycosyltransferase family 28 C-terminal domain	Beta-D-glucosyl crocetin beta-1,6-glucosyltransferase OS=Gardenia jasminoides OX=114476 GN=UGT94E5 PE=1 SV=1	S	Function unknown	hypothetical protein SPRG_07526 [Saprolegnia parasitica CBS 223.65]
c1029655.graph_c0	--	--	Cellular Component: mitochondrion (GO:0005739);; Cellular Component: ribosome (GO:0005840);;	K02915|4.62318e-20|sita:101776413|K02915 large subunit ribosomal protein L34e | (RefSeq) 60S ribosomal protein L34	[J]	Translation, ribosomal structure and biogenesis	Ribosomal protein L34e	60S ribosomal protein L34-1 OS=Arabidopsis thaliana OX=3702 GN=RPL34A PE=2 SV=1	J	Translation, ribosomal structure and biogenesis	60S ribosomal protein L34 [Zea mays]
c1029667.graph_c0	--	--	--	K09660|2.57714e-33|smo:SELMODRAFT_272277|K09660 mannose-P-dolichol utilization defect 1 | (RefSeq) hypothetical protein	[R]	General function prediction only	PQ loop repeat	Mannose-P-dolichol utilization defect 1 protein homolog 1 OS=Arabidopsis thaliana OX=3702 GN=At5g59470 PE=2 SV=1	S	Function unknown	conserved hypothetical protein [Galactomyces candidum]
c1029680.graph_c0	[HR]	--	Molecular Function: peptidase activity (GO:0008233);;	K01259|3.64496e-127|pda:103709475|K01259 proline iminopeptidase [EC:3.4.11.5] | (RefSeq) proline iminopeptidase	--	--	alpha/beta hydrolase fold;; Alpha/beta hydrolase family;; Serine aminopeptidase, S33	Proline iminopeptidase OS=Arabidopsis thaliana OX=3702 GN=PIP PE=2 SV=3	E	Amino acid transport and metabolism	proline iminopeptidase [Dorcoceras hygrometricum]
c1029685.graph_c0	[J]	Translation, ribosomal structure and biogenesis	Molecular Function: structural constituent of ribosome (GO:0003735);; Biological Process: translation (GO:0006412);; Cellular Component: large ribosomal subunit (GO:0015934);;	K02880|8.05289e-70|gra:105785858|K02880 large subunit ribosomal protein L17e | (RefSeq) 60S ribosomal protein L17-2-like	[J]	Translation, ribosomal structure and biogenesis	Ribosomal protein L22p/L17e	60S ribosomal protein L17-2 OS=Arabidopsis thaliana OX=3702 GN=RPL17B PE=2 SV=2	J	Translation, ribosomal structure and biogenesis	50S ribosomal protein L22 [Lobosporangium transversale]
c1029690.graph_c0	--	--	Molecular Function: translation initiation factor activity (GO:0003743);; Biological Process: translational initiation (GO:0006413);;	K11593|5.09182e-60|mtr:MTR_2g028910|K11593 eukaryotic translation initiation factor 2C | (RefSeq) eukaryotic translation initiation factor 2c, putative	[J]	Translation, ribosomal structure and biogenesis	--	Protein argonaute 3 OS=Arabidopsis thaliana OX=3702 GN=AGO3 PE=3 SV=1	J	Translation, ribosomal structure and biogenesis	Protein argonaute 2 [Cajanus cajan]
c1029698.graph_c1	--	--	Cellular Component: vacuolar membrane (GO:0005774);; Biological Process: transport (GO:0006810);; Biological Process: autophagy (GO:0006914);; Biological Process: protein localization (GO:0008104);; Biological Process: cellular localization (GO:0051641);;	K08341|3.65969e-26|mis:MICPUN_109644|K08341 GABA(A) receptor-associated protein | (RefSeq) ATG8; autophagy-related protein 8	[Z]	Cytoskeleton	Autophagy protein Atg8 ubiquitin like	Autophagy-related protein 8d OS=Arabidopsis thaliana OX=3702 GN=ATG8D PE=1 SV=1	U	Intracellular trafficking, secretion, and vesicular transport	Putative Autophagy-related protein [Lichtheimia ramosa]
c1029702.graph_c1	--	--	Molecular Function: aspartic-type endopeptidase activity (GO:0004190);; Biological Process: proteolysis (GO:0006508);;	--	[O]	Posttranslational modification, protein turnover, chaperones	Xylanase inhibitor C-terminal	Basic 7S globulin OS=Glycine max OX=3847 GN=BG PE=1 SV=2	O	Posttranslational modification, protein turnover, chaperones	Basic 7S globulin [Glycine soja]
c1029703.graph_c0	[O]	Posttranslational modification, protein turnover, chaperones	Molecular Function: binding (GO:0005488);; Cellular Component: vacuole (GO:0005773);; Cellular Component: cytosol (GO:0005829);; Cellular Component: plasma membrane (GO:0005886);; Cellular Component: plasmodesma (GO:0009506);; Biological Process: response to metal ion (GO:0010038);;	K03233|8.37324e-28|thj:104816825|K03233 elongation factor 1-gamma | (RefSeq) probable elongation factor 1-gamma 2	[O]	Posttranslational modification, protein turnover, chaperones	Glutathione S-transferase, C-terminal domain;; Glutathione S-transferase, C-terminal domain;; Glutathione S-transferase, N-terminal domain;; Glutathione S-transferase, N-terminal domain;; Glutathione S-transferase, C-terminal domain;; Glutathione S-transferase, N-terminal domain	Probable elongation factor 1-gamma 1 OS=Arabidopsis thaliana OX=3702 GN=At1g09640 PE=1 SV=1	O	Posttranslational modification, protein turnover, chaperones	elongation factor 1-gamma [Blastocystis sp. ATCC 50177/Nand II]
c1029756.graph_c1	[G]	Carbohydrate transport and metabolism	--	K01810|9.2568e-43|mis:MICPUN_104983|K01810 glucose-6-phosphate isomerase [EC:5.3.1.9] | (RefSeq) PGI; phosphoglucose isomerase	[G]	Carbohydrate transport and metabolism	Phosphoglucose isomerase	Glucose-6-phosphate isomerase, cytosolic 2B (Fragment) OS=Clarkia lewisii OX=3936 GN=PGIC2-B PE=3 SV=1	G	Carbohydrate transport and metabolism	glucose-6-phosphate isomerase [Fonsecaea multimorphosa CBS 102226]
c1029778.graph_c0	--	--	--	--	--	--	--	--	--	--	uncharacterized protein LOC107475759 isoform X1 [Arachis duranensis]
c1029846.graph_c0	[R]	General function prediction only	Molecular Function: protein binding (GO:0005515);; Cellular Component: nuclear envelope (GO:0005635);; Cellular Component: cytosol (GO:0005829);; Biological Process: nucleocytoplasmic transport (GO:0006913);; Cellular Component: plastid (GO:0009536);; Biological Process: RNA transport (GO:0050658);; Cellular Component: Cul4-RING E3 ubiquitin ligase complex (GO:0080008);; Molecular Function: organ…	K14298|3.15359e-111|eus:EUTSA_v10018796mg|K14298 mRNA export factor | (RefSeq) hypothetical protein	[A]	RNA processing and modification	WD domain, G-beta repeat;; Anaphase-promoting complex subunit 4 WD40 domain	Protein RAE1 OS=Arabidopsis thaliana OX=3702 GN=RAE1 PE=1 SV=2	S	Function unknown	protein RAE1 [Eutrema salsugineum]
c1029881.graph_c0	[J]	Translation, ribosomal structure and biogenesis	Molecular Function: RNA binding (GO:0003723);; Molecular Function: aminoacyl-tRNA ligase activity (GO:0004812);; Biological Process: tRNA aminoacylation for protein translation (GO:0006418);; Cellular Component: intracellular membrane-bounded organelle (GO:0043231);; Cellular Component: cytoplasmic part (GO:0044444);;	K01874|9.31867e-34|thj:104808703|K01874 methionyl-tRNA synthetase [EC:6.1.1.10] | (RefSeq) methionine--tRNA ligase, cytoplasmic-like	[J]	Translation, ribosomal structure and biogenesis	Putative tRNA binding domain	Methionine--tRNA ligase, cytoplasmic OS=Arabidopsis thaliana OX=3702 GN=At4g13780 PE=2 SV=1	J	Translation, ribosomal structure and biogenesis	hypothetical protein J056_001561 [Wallemia ichthyophaga EXF-994]
c1029946.graph_c1	[O]	Posttranslational modification, protein turnover, chaperones	--	K17609|2.02111e-25|mis:MICPUN_60331|K17609 nucleoredoxin [EC:1.8.1.8] | (RefSeq) TRX_2; thioredoxin	[R]	General function prediction only	Thioredoxin-like;; Thioredoxin	Probable nucleoredoxin 1-1 OS=Oryza sativa subsp. japonica OX=39947 GN=Os03g0405500 PE=2 SV=1	O	Posttranslational modification, protein turnover, chaperones	Nucleoredoxin [Phytophthora palmivora var. palmivora]
c1029975.graph_c0	[J]	Translation, ribosomal structure and biogenesis	Biological Process: cellular process (GO:0009987);; Biological Process: ribosome biogenesis (GO:0042254);; Cellular Component: intracellular part (GO:0044424);;	--	[J]	Translation, ribosomal structure and biogenesis	Shwachman-Bodian-Diamond syndrome (SBDS) protein;; SBDS protein C-terminal domain	--	J	Translation, ribosomal structure and biogenesis	hypothetical protein Gasu_32900 [Galdieria sulphuraria]
c1029987.graph_c0	[R]	General function prediction only	--	--	[Q]	Secondary metabolites biosynthesis, transport and catabolism	short chain dehydrogenase;; Enoyl-(Acyl carrier protein) reductase;; KR domain	(+)-neomenthol dehydrogenase OS=Capsicum annuum OX=4072 GN=MNR1 PE=1 SV=1	S	Function unknown	hypothetical protein MNEG_10981 [Monoraphidium neglectum]
c1029992.graph_c0	--	--	Molecular Function: structural constituent of ribosome (GO:0003735);; Biological Process: translation (GO:0006412);; Cellular Component: cytosolic large ribosomal subunit (GO:0022625);;	K02882|1.7446e-65|apro:F751_1551|K02882 large subunit ribosomal protein L18Ae | (RefSeq) 60S ribosomal protein L18a-2	[J]	Translation, ribosomal structure and biogenesis	Ribosomal proteins 50S-L18Ae/60S-L20/60S-L18A	60S ribosomal protein L18a OS=Castanea sativa OX=21020 GN=RPL18A PE=2 SV=1	J	Translation, ribosomal structure and biogenesis	predicted protein [Hordeum vulgare subsp. vulgare]
c1029997.graph_c0	[M]	Cell wall/membrane/envelope biogenesis	Molecular Function: UDP-glucose 6-dehydrogenase activity (GO:0003979);; Cellular Component: nucleus (GO:0005634);; Cellular Component: cytosol (GO:0005829);; Biological Process: carbohydrate metabolic process (GO:0005975);; Biological Process: glycosaminoglycan biosynthetic process (GO:0006024);; Biological Process: UDP-glucuronate biosynthetic process (GO:0006065);;	K00012|0|mpp:MICPUCDRAFT_35067|K00012 UDPglucose 6-dehydrogenase [EC:1.1.1.22] | (RefSeq) hypothetical protein	[GT]	--	UDP-glucose/GDP-mannose dehydrogenase family, NAD binding domain;; UDP-glucose/GDP-mannose dehydrogenase family, UDP binding domain;; UDP-glucose/GDP-mannose dehydrogenase family, central domain	UDP-glucose 6-dehydrogenase 1 OS=Glycine max OX=3847 GN=UGD1 PE=2 SV=1	M	Cell wall/membrane/envelope biogenesis	predicted protein [Micromonas pusilla CCMP1545]
c1030003.graph_c1	--	--	--	--	[Z]	Cytoskeleton	Calponin homology (CH) domain	--	Z	Cytoskeleton	actinin-like protein [Schizopora paradoxa]
c1030014.graph_c0	[J]	Translation, ribosomal structure and biogenesis	Molecular Function: structural constituent of ribosome (GO:0003735);; Cellular Component: ribosome (GO:0005840);; Biological Process: translation (GO:0006412);;	K02929|1.76845e-44|crb:CARUB_v10014940mg|K02929 large subunit ribosomal protein L44e | (RefSeq) hypothetical protein	[J]	Translation, ribosomal structure and biogenesis	Ribosomal protein L44	60S ribosomal protein L36a OS=Arabidopsis thaliana OX=3702 GN=RPL36AA PE=3 SV=3	J	Translation, ribosomal structure and biogenesis	hypothetical protein [Parasitella parasitica]
c1030042.graph_c0	--	--	--	--	--	--	Cofilin/tropomyosin-type actin-binding protein	--	S	Function unknown	predicted protein [Fibroporia radiculosa]
c1030090.graph_c0	--	--	--	--	[TZ]	--	LIM domain	Pollen-specific protein SF3 OS=Helianthus annuus OX=4232 GN=SF3 PE=2 SV=1	S	Function unknown	hypothetical protein GSI_11682 [Ganoderma sinense ZZ0214-1]
c1030212.graph_c0	--	--	--	--	--	--	--	--	S	Function unknown	--
c1030228.graph_c0	--	--	--	--	--	--	--	--	--	--	hypothetical protein V493_03060, partial [Pseudogymnoascus sp. VKM F-4281 (FW-2241)]
c1030229.graph_c0	--	--	Cellular Component: endoplasmic reticulum (GO:0005783);; Biological Process: endoplasmic reticulum organization (GO:0007029);;	K17338|1.15305e-27|gsl:Gasu_30930|K17338 receptor expression-enhancing protein 1/2/3/4 | (RefSeq) HVA22 family protein isoform 1	[U]	Intracellular trafficking, secretion, and vesicular transport	TB2/DP1, HVA22 family	HVA22-like protein k OS=Arabidopsis thaliana OX=3702 GN=HVA22K PE=2 SV=1	U	Intracellular trafficking, secretion, and vesicular transport	hypothetical protein K457DRAFT_111196 [Mortierella elongata AG-77]
c1030232.graph_c0	--	--	Molecular Function: calcium-dependent cysteine-type endopeptidase activity (GO:0004198);; Cellular Component: cytoplasm (GO:0005737);; Biological Process: proteolysis (GO:0006508);; Cellular Component: integral component of membrane (GO:0016021);;	--	[OT]	--	Calpain family cysteine protease	Calpain-type cysteine protease DEK1 OS=Arabidopsis thaliana OX=3702 GN=DEK1 PE=1 SV=1	O	Posttranslational modification, protein turnover, chaperones	PREDICTED: calpain-type cysteine protease DEK1 [Cicer arietinum]
c1030245.graph_c0	[O]	Posttranslational modification, protein turnover, chaperones	Biological Process: protein peptidyl-prolyl isomerization (GO:0000413);; Molecular Function: peptidyl-prolyl cis-trans isomerase activity (GO:0003755);;	K09579|1.09776e-49|bvg:104894021|K09579 peptidyl-prolyl cis-trans isomerase NIMA-interacting 4 [EC:5.2.1.8] | (RefSeq) peptidyl-prolyl cis-trans isomerase NIMA-interacting 4	[O]	Posttranslational modification, protein turnover, chaperones	PPIC-type PPIASE domain;; PPIC-type PPIASE domain	Peptidyl-prolyl cis-trans isomerase Pin1 OS=Digitalis lanata OX=49450 GN=PARV12.8 PE=1 SV=1	O	Posttranslational modification, protein turnover, chaperones	peptidyl-prolyl cis-trans isomerase NIMA-interacting 4 [Spinacia oleracea]
c1030265.graph_c0	--	--	--	--	--	--	ATP synthase delta (OSCP) subunit	--	S	Function unknown	--
c1030288.graph_c0	[J]	Translation, ribosomal structure and biogenesis	Molecular Function: structural constituent of ribosome (GO:0003735);; Cellular Component: ribosome (GO:0005840);; Biological Process: translation (GO:0006412);;	K02957|5.10982e-66|gsl:Gasu_18680|K02957 small subunit ribosomal protein S15Ae | (RefSeq) 40S ribosomal protein S15A	[J]	Translation, ribosomal structure and biogenesis	Ribosomal protein S8	40S ribosomal protein S15a OS=Daucus carota OX=4039 GN=RPS15A PE=2 SV=3	J	Translation, ribosomal structure and biogenesis	40S ribosomal protein S15A [Galdieria sulphuraria]
c1030341.graph_c0	--	--	Molecular Function: metal ion binding (GO:0046872);; Molecular Function: organic cyclic compound binding (GO:0097159);; Molecular Function: heterocyclic compound binding (GO:1901363);;	--	--	--	--	--	S	Function unknown	serine/arginine-rich splicing factor 4-like [Cajanus cajan]
c1030347.graph_c0	--	--	Biological Process: transcription, DNA-templated (GO:0006351);; Biological Process: transport (GO:0006810);; Cellular Component: intracellular part (GO:0044424);;	K01527|3.39158e-25|mis:MICPUN_107422|K01527 nascent polypeptide-associated complex subunit beta | (RefSeq) BTF3; hypothetical protein	[K]	Transcription	NAC domain	Basic transcription factor 3 OS=Arabidopsis thaliana OX=3702 GN=BTF3 PE=1 SV=1	K	Transcription	hypothetical protein H257_09349 [Aphanomyces astaci]
c1030363.graph_c0	--	--	--	K03349|9.02662e-100|eus:EUTSA_v10027638mg|K03349 anaphase-promoting complex subunit 2 | (RefSeq) hypothetical protein	[DO]	--	Cullin family;; Anaphase promoting complex (APC) subunit 2	Anaphase-promoting complex subunit 2 OS=Arabidopsis thaliana OX=3702 GN=APC2 PE=1 SV=1	O	Posttranslational modification, protein turnover, chaperones	hypothetical protein K493DRAFT_207320, partial [Basidiobolus meristosporus CBS 931.73]
c1030381.graph_c0	[J]	Translation, ribosomal structure and biogenesis	Biological Process: cytoplasmic translation (GO:0002181);; Molecular Function: structural constituent of ribosome (GO:0003735);; Cellular Component: cytosolic large ribosomal subunit (GO:0022625);;	K02877|1.87102e-81|pop:POPTR_0001s15590g|K02877 large subunit ribosomal protein L15e | (RefSeq) 60S ribosomal protein L15	[J]	Translation, ribosomal structure and biogenesis	Ribosomal L15	60S ribosomal protein L15 OS=Petunia hybrida OX=4102 GN=RPL15 PE=2 SV=1	J	Translation, ribosomal structure and biogenesis	hypothetical protein CEUSTIGMA_g4771.t1 [Chlamydomonas eustigma]
c1030412.graph_c0	--	--	--	--	--	--	Fungal Zn(2)-Cys(6) binuclear cluster domain	--	S	Function unknown	uncharacterized protein KLLA0_A02585g [Kluyveromyces lactis]
c1030417.graph_c0	--	--	--	--	--	--	--	--	S	Function unknown	hypothetical protein Gasu_54080 [Galdieria sulphuraria]
c1030459.graph_c0	[E]	Amino acid transport and metabolism	--	--	--	--	Cobalamin-independent synthase, Catalytic domain	--	--	--	PREDICTED: 2-hydroxypropyl-CoM lyase-like [Ziziphus jujuba]
c1030462.graph_c0	--	--	--	--	--	--	Peptidase inhibitor I9	--	--	--	hypothetical protein BCR36DRAFT_583229 [Piromyces finnis]
c1030465.graph_c0	--	--	Cellular Component: integral component of membrane (GO:0016021);;	K17279|4.77263e-20|cre:CHLREDRAFT_143837|K17279 receptor expression-enhancing protein 5/6 | (RefSeq) hypothetical protein	[U]	Intracellular trafficking, secretion, and vesicular transport	TB2/DP1, HVA22 family	HVA22-like protein k OS=Arabidopsis thaliana OX=3702 GN=HVA22K PE=2 SV=1	U	Intracellular trafficking, secretion, and vesicular transport	hypothetical protein F443_22117 [Phytophthora parasitica P1569]
c1030487.graph_c0	[J]	Translation, ribosomal structure and biogenesis	Biological Process: maturation of SSU-rRNA from tricistronic rRNA transcript (SSU-rRNA, 5.8S rRNA, LSU-rRNA) (GO:0000462);; Molecular Function: structural constituent of ribosome (GO:0003735);; Molecular Function: GTP binding (GO:0005525);; Biological Process: translation (GO:0006412);; Biological Process: small GTPase mediated signal transduction (GO:0007264);; Cellular Component: cytosolic smal…	K02960|5.29242e-64|pxb:103930801|K02960 small subunit ribosomal protein S16e | (RefSeq) 40S ribosomal protein S16	[J]	Translation, ribosomal structure and biogenesis	Ribosomal protein S9/S16	40S ribosomal protein S16 OS=Gossypium hirsutum OX=3635 GN=RPS16 PE=2 SV=1	J	Translation, ribosomal structure and biogenesis	40S ribosomal protein S16 putative [Albugo laibachii Nc14]
c1030512.graph_c2	[I]	Lipid transport and metabolism	Biological Process: single-organism metabolic process (GO:0044710);;	K10255|2.30161e-59|vcn:VOLCADRAFT_80845|K10255 acyl-lipid omega-6 desaturase (Delta-12 desaturase) [EC:1.14.19.23 1.14.19.45] | (RefSeq) omega-6-FAD, chloroplast isoform	--	--	Fatty acid desaturase	Omega-6 fatty acid desaturase, chloroplastic OS=Spinacia oleracea OX=3562 GN=FAD6 PE=1 SV=1	I	Lipid transport and metabolism	omega-6-FAD, chloroplast isoform [Volvox carteri f. nagariensis]
c1030516.graph_c0	--	--	--	--	[G]	Carbohydrate transport and metabolism	Major Facilitator Superfamily	--	G	Carbohydrate transport and metabolism	hypothetical protein SPPG_07415 [Spizellomyces punctatus DAOM BR117]
c1030592.graph_c0	--	--	Molecular Function: RNA binding (GO:0003723);; Biological Process: RNA processing (GO:0006396);;	--	--	--	--	--	S	Function unknown	hypothetical protein PPTG_11239 [Phytophthora parasitica INRA-310]
c1030653.graph_c0	[C]	Energy production and conversion	Molecular Function: transferase activity (GO:0016740);;	K00658|2.02163e-107|smo:SELMODRAFT_163943|K00658 2-oxoglutarate dehydrogenase E2 component (dihydrolipoamide succinyltransferase) [EC:2.3.1.61] | (RefSeq) hypothetical protein	[C]	Energy production and conversion	2-oxoacid dehydrogenases acyltransferase (catalytic domain);; Biotin-requiring enzyme	Dihydrolipoyllysine-residue succinyltransferase component of 2-oxoglutarate dehydrogenase complex 2, mitochondrial OS=Arabidopsis thaliana OX=3702 GN=At4g26910 PE=1 SV=2	C	Energy production and conversion	hypothetical protein CANARDRAFT_22582 [Candida arabinofermentans NRRL YB-2248]
c1030673.graph_c0	[CI]	--	Molecular Function: binding (GO:0005488);; Biological Process: sterol biosynthetic process (GO:0016126);; Cellular Component: intracellular membrane-bounded organelle (GO:0043231);; Cellular Component: membrane part (GO:0044425);; Cellular Component: cytoplasmic part (GO:0044444);;	--	[C]	Energy production and conversion	Cytochrome b5-like Heme/Steroid binding domain	Cytochrome b5 isoform E OS=Arabidopsis thaliana OX=3702 GN=CYTB5-E PE=1 SV=2	CI	--	uncharacterized protein CAGL0L03828g [[Candida] glabrata]
c1030712.graph_c0	--	--	Molecular Function: ion channel activity (GO:0005216);; Cellular Component: membrane (GO:0016020);; Biological Process: ion transmembrane transport (GO:0034220);;	--	[PT]	--	Ion transport protein;; Polycystin cation channel	--	P	Inorganic ion transport and metabolism	Ion transport protein-domain-containing protein [Catenaria anguillulae PL171]
c1030713.graph_c0	--	--	--	--	[T]	Signal transduction mechanisms	Phosphatidylinositol 3- and 4-kinase	Phosphatidylinositol 4-kinase gamma 3 OS=Arabidopsis thaliana OX=3702 GN=PI4KG3 PE=2 SV=1	S	Function unknown	hypothetical protein SELMODRAFT_149153 [Selaginella moellendorffii]
c1030721.graph_c0	--	--	Molecular Function: catalytic activity (GO:0003824);; Biological Process: primary metabolic process (GO:0044238);; Biological Process: cellular macromolecule metabolic process (GO:0044260);;	K10798|1.77646e-98|ccp:CHC_T00003917001|K10798 poly [ADP-ribose] polymerase [EC:2.4.2.30] | (RefSeq) hypothetical protein	[KLO]	--	Poly(ADP-ribose) polymerase catalytic domain;; Poly(ADP-ribose) polymerase, regulatory domain;; WGR domain	Poly [ADP-ribose] polymerase 2-A OS=Oryza sativa subsp. japonica OX=39947 GN=PARP2-A PE=3 SV=2	S	Function unknown	conserved unknown protein [Ectocarpus siliculosus]
c1030740.graph_c0	--	--	Biological Process: transcription, DNA-templated (GO:0006351);; Cellular Component: cytoplasmic part (GO:0044444);;	K01527|1.9442e-37|bvg:104885950|K01527 nascent polypeptide-associated complex subunit beta | (RefSeq) transcription factor BTF3 homolog 4-like	[K]	Transcription	NAC domain	Nascent polypeptide-associated complex subunit beta OS=Arabidopsis thaliana OX=3702 GN=At1g73230 PE=2 SV=1	K	Transcription	hypothetical protein EMIHUDRAFT_438269 [Emiliania huxleyi CCMP1516]
c1030744.graph_c0	[J]	Translation, ribosomal structure and biogenesis	Molecular Function: structural constituent of ribosome (GO:0003735);; Cellular Component: cytosolic large ribosomal subunit (GO:0022625);;	K02900|1.15656e-38|sind:105168300|K02900 large subunit ribosomal protein L27Ae | (RefSeq) 60S ribosomal protein L27a-3	[J]	Translation, ribosomal structure and biogenesis	Ribosomal proteins 50S-L15, 50S-L18e, 60S-L27A	60S ribosomal protein L27a-3 OS=Arabidopsis thaliana OX=3702 GN=RPL27AC PE=2 SV=2	J	Translation, ribosomal structure and biogenesis	unknown [Lotus japonicus]
c1030745.graph_c0	[V]	Defense mechanisms	Cellular Component: cytoplasm (GO:0005737);; Molecular Function: hydrolase activity, acting on ester bonds (GO:0016788);;	K01070|3.38025e-114|smo:SELMODRAFT_151094|K01070 S-formylglutathione hydrolase [EC:3.1.2.12] | (RefSeq) hypothetical protein	[R]	General function prediction only	Putative esterase	S-formylglutathione hydrolase OS=Arabidopsis thaliana OX=3702 GN=SFGH PE=1 SV=2	S	Function unknown	s-formylglutathione hydrolase [Basidiobolus meristosporus CBS 931.73]
c1030783.graph_c0	[MDT]	--	Molecular Function: ATP binding (GO:0005524);; Cellular Component: integral component of membrane (GO:0016021);;	--	[O]	Posttranslational modification, protein turnover, chaperones	ATPase family associated with various cellular activities (AAA)	ATPase family AAA domain-containing protein FIGL1 OS=Arabidopsis thaliana OX=3702 GN=FIGL1 PE=2 SV=2	O	Posttranslational modification, protein turnover, chaperones	Putative ATPase, AAA-type domain containing protein [Rhizopus microsporus]
c1030783.graph_c1	[O]	Posttranslational modification, protein turnover, chaperones	Molecular Function: ATP binding (GO:0005524);; Cellular Component: integral component of membrane (GO:0016021);;	--	[O]	Posttranslational modification, protein turnover, chaperones	ATPase family associated with various cellular activities (AAA);; Holliday junction DNA helicase ruvB N-terminus;; AAA domain (dynein-related subfamily);; Magnesium chelatase, subunit ChlI	26S proteasome regulatory subunit 8 homolog A OS=Arabidopsis thaliana OX=3702 GN=RPT6A PE=1 SV=1	O	Posttranslational modification, protein turnover, chaperones	hypothetical protein BZG36_04153 [Bifiguratus adelaidae]
c1030800.graph_c0	--	--	--	--	--	--	LIM domain	--	--	--	--
c1030810.graph_c0	[J]	Translation, ribosomal structure and biogenesis	Molecular Function: nucleotide binding (GO:0000166);; Molecular Function: nucleic acid binding (GO:0003676);;	K12741|2.83746e-11|sind:105158006|K12741 heterogeneous nuclear ribonucleoprotein A1/A3 | (RefSeq) glycine-rich RNA-binding protein 2, mitochondrial-like	[R]	General function prediction only	RNA recognition motif. (a.k.a. RRM, RBD, or RNP domain)	Glycine-rich RNA-binding protein blt801 OS=Hordeum vulgare OX=4513 GN=blt801 PE=1 SV=1	S	Function unknown	putative Glycine-rich RNA-binding protein [Taphrina deformans PYCC 5710]
c1030819.graph_c0	[J]	Translation, ribosomal structure and biogenesis	Biological Process: cytoplasmic translation (GO:0002181);; Molecular Function: structural constituent of ribosome (GO:0003735);; Molecular Function: rRNA binding (GO:0019843);; Cellular Component: cytosolic large ribosomal subunit (GO:0022625);;	K02940|6.12866e-57|vra:106763543|K02940 large subunit ribosomal protein L9e | (RefSeq) 60S ribosomal protein L9	[J]	Translation, ribosomal structure and biogenesis	Ribosomal protein L6	60S ribosomal protein L9 OS=Pisum sativum OX=3888 GN=RPL9 PE=2 SV=1	J	Translation, ribosomal structure and biogenesis	hypothetical protein GLYMA_04G226900 [Glycine max]
c1030843.graph_c0	--	--	Biological Process: rRNA processing (GO:0006364);; Cellular Component: cytosolic small ribosomal subunit (GO:0022627);; Cellular Component: 90S preribosome (GO:0030686);; Cellular Component: small-subunit processome (GO:0032040);; Biological Process: ribosomal small subunit biogenesis (GO:0042274);;	K02993|4.89219e-54|atr:18436948|K02993 small subunit ribosomal protein S7e | (RefSeq) 40S ribosomal protein S7	[J]	Translation, ribosomal structure and biogenesis	Ribosomal protein S7e	40S ribosomal protein S7 OS=Avicennia marina OX=82927 GN=RPS7 PE=2 SV=1	J	Translation, ribosomal structure and biogenesis	40S ribosomal protein S7 [Amborella trichopoda]
c1030861.graph_c0	[I]	Lipid transport and metabolism	--	K01897|5.76623e-150|bdi:100843603|K01897 long-chain acyl-CoA synthetase [EC:6.2.1.3] | (RefSeq) long chain acyl-CoA synthetase 6, peroxisomal-like	[I]	Lipid transport and metabolism	AMP-binding enzyme	Long chain acyl-CoA synthetase 7, peroxisomal OS=Arabidopsis thaliana OX=3702 GN=LACS7 PE=1 SV=2	I	Lipid transport and metabolism	PREDICTED: long chain acyl-CoA synthetase 6, peroxisomal-like [Brachypodium distachyon]
c1030871.graph_c0	--	--	--	--	--	--	cAMP-regulated phosphoprotein/endosulfine conserved region	--	--	--	--
c1030874.graph_c0	[V]	Defense mechanisms	--	--	[R]	General function prediction only	Endoribonuclease L-PSP	Reactive Intermediate Deaminase A, chloroplastic OS=Arabidopsis thaliana OX=3702 GN=RIDA PE=1 SV=1	S	Function unknown	small G-protein Ras2 [Saitoella complicata NRRL Y-17804]
c1030875.graph_c0	[J]	Translation, ribosomal structure and biogenesis	Molecular Function: structural constituent of ribosome (GO:0003735);; Biological Process: translation (GO:0006412);; Cellular Component: cytosolic large ribosomal subunit (GO:0022625);;	K02912|1.53209e-36|cre:CHLREDRAFT_191758|K02912 large subunit ribosomal protein L32e | (RefSeq) RPL32; ribosomal protein L32, component of cytosolic 80S ribosome and 60S large subunit	[J]	Translation, ribosomal structure and biogenesis	Ribosomal protein L32	60S ribosomal protein L32-1 OS=Arabidopsis thaliana OX=3702 GN=RPL32A PE=2 SV=2	J	Translation, ribosomal structure and biogenesis	50S ribosomal protein L32 [Hesseltinella vesiculosa]
c1030919.graph_c0	[H]	Coenzyme transport and metabolism	--	K14156|2.38516e-36|pop:POPTR_0003s19230g|K14156 choline/ethanolamine kinase [EC:2.7.1.32 2.7.1.82] | (RefSeq) POPTRDRAFT_413422; hypothetical protein	[I]	Lipid transport and metabolism	Choline/ethanolamine kinase;; Phosphotransferase enzyme family;; Ecdysteroid kinase	Probable ethanolamine kinase OS=Arabidopsis thaliana OX=3702 GN=EMB1187 PE=2 SV=1	M	Cell wall/membrane/envelope biogenesis	hypothetical protein SPPG_07302 [Spizellomyces punctatus DAOM BR117]
c1030922.graph_c0	--	--	--	K02983|2.96327e-06|cme:CYME_CMT030C|K02983 small subunit ribosomal protein S30e | (RefSeq) 40S ribosomal protein S30	[JO]	--	--	--	--	--	--
c1030924.graph_c0	--	--	Molecular Function: catalytic activity (GO:0003824);; Biological Process: trehalose biosynthetic process (GO:0005992);;	K16055|3.20254e-11|pop:POPTR_0010s11510g|K16055 trehalose 6-phosphate synthase/phosphatase [EC:2.4.1.15 3.1.3.12] | (RefSeq) POPTRDRAFT_726767; hypothetical protein	[G]	Carbohydrate transport and metabolism	--	Alpha,alpha-trehalose-phosphate synthase [UDP-forming] 6 OS=Arabidopsis thaliana OX=3702 GN=TPS6 PE=1 SV=2	G	Carbohydrate transport and metabolism	PREDICTED: alpha,alpha-trehalose-phosphate synthase [UDP-forming] 6-like [Lupinus angustifolius]
c1030943.graph_c0	--	--	--	--	--	--	LIM domain	--	--	--	--
c1030949.graph_c0	--	--	Molecular Function: DNA binding (GO:0003677);; Molecular Function: helicase activity (GO:0004386);; Molecular Function: ATP binding (GO:0005524);; Cellular Component: nucleus (GO:0005634);; Molecular Function: zinc ion binding (GO:0008270);;	--	--	--	--	--	L	Replication, recombination and repair	PREDICTED: protein CHROMATIN REMODELING 4-like isoform X2 [Glycine max]
c1030990.graph_c0	--	--	Biological Process: ribosome biogenesis (GO:0042254);; Biological Process: nucleic acid metabolic process (GO:0090304);;	K18327|1.85972e-48|smo:SELMODRAFT_79010|K18327 RNA exonuclease 4 [EC:3.1.-.-] | (RefSeq) hypothetical protein	[L]	Replication, recombination and repair	Exonuclease;; 3'-5' exonuclease	Small RNA degrading nuclease 3 OS=Arabidopsis thaliana OX=3702 GN=SDN3 PE=1 SV=1	L	Replication, recombination and repair	ribonuclease H-like domain-containing protein [Absidia repens]
c1031047.graph_c0	[E]	Amino acid transport and metabolism	Cellular Component: membrane (GO:0016020);;	K03294|2.423e-70|ota:Ot15g00170|K03294 basic amino acid/polyamine antiporter, APA family | (RefSeq) Amino acid transporters (ISS)	[E]	Amino acid transport and metabolism	Amino acid permease;; Amino acid permease;; C-terminus of AA_permease	Cationic amino acid transporter 9, chloroplastic OS=Arabidopsis thaliana OX=3702 GN=CAT9 PE=2 SV=1	E	Amino acid transport and metabolism	amino acid permease [Basidiobolus meristosporus CBS 931.73]
c1031073.graph_c0	[C]	Energy production and conversion	Molecular Function: transferase activity, transferring acyl groups, acyl groups converted into alkyl on transfer (GO:0046912);;	K01647|2.20367e-167|mus:104000860|K01647 citrate synthase [EC:2.3.3.1] | (RefSeq) citrate synthase 3, peroxisomal	[C]	Energy production and conversion	Citrate synthase, C-terminal domain	Citrate synthase 2, peroxisomal OS=Arabidopsis thaliana OX=3702 GN=CSY2 PE=2 SV=1	C	Energy production and conversion	citrate (Si)-synthase [Spizellomyces punctatus DAOM BR117]
c1031077.graph_c0	--	--	Cellular Component: vacuolar proton-transporting V-type ATPase, V0 domain (GO:0000220);; Biological Process: vacuolar acidification (GO:0007035);; Biological Process: ATP hydrolysis coupled proton transport (GO:0015991);; Cellular Component: integral component of membrane (GO:0016021);; Molecular Function: proton-transporting ATPase activity, rotational mechanism (GO:0046961);;	K02155|3.62146e-18|obr:102719266|K02155 V-type H+-transporting ATPase 16kDa proteolipid subunit | (RefSeq) V-type proton ATPase 16 kDa proteolipid subunit-like	[C]	Energy production and conversion	ATP synthase subunit C	V-type proton ATPase 16 kDa proteolipid subunit (Fragment) OS=Zea mays OX=4577 PE=2 SV=2	C	Energy production and conversion	hypothetical protein PAHAL_E00281 [Panicum hallii]
c1031174.graph_c0	[I]	Lipid transport and metabolism	Molecular Function: inositol-3-phosphate synthase activity (GO:0004512);; Cellular Component: ribosome (GO:0005840);; Biological Process: inositol biosynthetic process (GO:0006021);; Biological Process: phospholipid biosynthetic process (GO:0008654);;	K01858|0|gsl:Gasu_11420|K01858 myo-inositol-1-phosphate synthase [EC:5.5.1.4] | (RefSeq) myo-inositol-1-phosphate synthase	[I]	Lipid transport and metabolism	Myo-inositol-1-phosphate synthase;; Myo-inositol-1-phosphate synthase	Inositol-3-phosphate synthase OS=Triticum aestivum OX=4565 GN=MIPS PE=2 SV=1	I	Lipid transport and metabolism	inositol-3-phosphate synthase, putative [Pythium insidiosum]
c1031208.graph_c0	--	--	--	K17479|8.09742e-06|mus:103977192|K17479 glutaredoxin domain-containing cysteine-rich protein 1 | (RefSeq) uncharacterized protein At3g28850-like	[S]	Function unknown	SH3-binding, glutamic acid-rich protein;; Glutaredoxin	--	O	Posttranslational modification, protein turnover, chaperones	hypothetical protein BCR41DRAFT_45614 [Lobosporangium transversale]
c1031230.graph_c0	--	--	--	--	--	--	MIOREX complex component 7	--	--	--	predicted protein [Lichtheimia corymbifera JMRC:FSU:9682]
c1031249.graph_c0	--	--	Cellular Component: intracellular (GO:0005622);;	K02903|2.70817e-06|sly:101250778|K02903 large subunit ribosomal protein L28e | (RefSeq) 60S ribosomal protein L28-1	--	--	Ribosomal L28e protein family	60S ribosomal protein L28-2 OS=Arabidopsis thaliana OX=3702 GN=RPL28C PE=2 SV=1	J	Translation, ribosomal structure and biogenesis	ribosomal L28e/Mak16 [Lobosporangium transversale]
c1031279.graph_c0	[O]	Posttranslational modification, protein turnover, chaperones	Cellular Component: cytoplasm (GO:0005737);; Molecular Function: ubiquitin protein ligase binding (GO:0031625);; Molecular Function: ubiquitin protein ligase activity (GO:0061630);;	K10575|5.70691e-55|pop:POPTR_0010s21380g|K10575 ubiquitin-conjugating enzyme E2 G1 [EC:2.3.2.23] | (RefSeq) POPTRDRAFT_227541; Ubiquitin-conjugating enzyme E2 13 family protein	[O]	Posttranslational modification, protein turnover, chaperones	Ubiquitin-conjugating enzyme	Ubiquitin-conjugating enzyme E2 7 OS=Arabidopsis thaliana OX=3702 GN=UBC7 PE=1 SV=1	O	Posttranslational modification, protein turnover, chaperones	PREDICTED: ubiquitin-conjugating enzyme E2 7-like [Populus euphratica]
c1031319.graph_c0	[CE]	--	Molecular Function: oxidoreductase activity, acting on the CH-OH group of donors, NAD or NADP as acceptor (GO:0016616);; Molecular Function: metal ion binding (GO:0046872);; Biological Process: oxidation-reduction process (GO:0055114);;	K00030|4.3727e-119|ppp:PHYPADRAFT_133156|K00030 isocitrate dehydrogenase (NAD+) [EC:1.1.1.41] | (RefSeq) hypothetical protein	[E]	Amino acid transport and metabolism	Isocitrate/isopropylmalate dehydrogenase	Isocitrate dehydrogenase [NAD] regulatory subunit 1, mitochondrial OS=Arabidopsis thaliana OX=3702 GN=IDH1 PE=1 SV=2	E	Amino acid transport and metabolism	putative isocitrate dehydrogenase subunit 1 [Phaeomoniella chlamydospora]
c1031322.graph_c1	--	--	Molecular Function: GTP binding (GO:0005525);; Cellular Component: intracellular (GO:0005622);; Biological Process: small GTPase mediated signal transduction (GO:0007264);; Cellular Component: integral component of membrane (GO:0016021);;	K04392|3.69189e-33|bvg:104903926|K04392 Ras-related C3 botulinum toxin substrate 1 | (RefSeq) rac-like GTP-binding protein 5	[R]	General function prediction only	Ras family	Rac-like GTP-binding protein 5 OS=Oryza sativa subsp. japonica OX=39947 GN=RAC5 PE=2 SV=2	S	Function unknown	small GTP-binding protein domain, variant [Allomyces macrogynus ATCC 38327]
c1031404.graph_c1	[C]	Energy production and conversion	--	--	[Q]	Secondary metabolites biosynthesis, transport and catabolism	short chain dehydrogenase;; Enoyl-(Acyl carrier protein) reductase;; KR domain;; Polysaccharide biosynthesis protein	11-beta-hydroxysteroid dehydrogenase 1B OS=Arabidopsis thaliana OX=3702 GN=HSD1 PE=1 SV=1	S	Function unknown	NAD(P)-binding protein [Basidiobolus meristosporus CBS 931.73]
c1031497.graph_c0	--	--	--	--	--	--	--	--	--	--	hypothetical protein MTR_3g088705 [Medicago truncatula]
c1031509.graph_c0	--	--	Molecular Function: protein kinase activity (GO:0004672);; Biological Process: response to glucose (GO:0009749);; Biological Process: positive regulation of abscisic acid-activated signaling pathway (GO:0009789);;	--	[T]	Signal transduction mechanisms	Protein tyrosine kinase;; Protein kinase domain;; SH2 domain	Probable serine/threonine-protein kinase SIS8 OS=Arabidopsis thaliana OX=3702 GN=SIS8 PE=1 SV=1	T	Signal transduction mechanisms	hypothetical protein SELMODRAFT_46485, partial [Selaginella moellendorffii]
c1031515.graph_c0	--	--	Biological Process: ubiquitin-dependent protein catabolic process (GO:0006511);; Molecular Function: kinase activity (GO:0016301);; Biological Process: phosphorylation (GO:0016310);; Molecular Function: ligase activity (GO:0016874);;	K03094|8.95802e-26|vvi:100252349|K03094 S-phase kinase-associated protein 1 | (RefSeq) SKP1-like protein 1B	[O]	Posttranslational modification, protein turnover, chaperones	Skp1 family, tetramerisation domain	SKP1-like protein 1A OS=Arabidopsis thaliana OX=3702 GN=SKP1A PE=1 SV=1	O	Posttranslational modification, protein turnover, chaperones	conserved unknown protein [Ectocarpus siliculosus]
c1031517.graph_c0	[R]	General function prediction only	Molecular Function: carbonate dehydratase activity (GO:0004089);; Cellular Component: mitochondrial respiratory chain complex I (GO:0005747);; Cellular Component: chloroplast (GO:0009507);; Biological Process: response to salt stress (GO:0009651);; Biological Process: anther dehiscence (GO:0009901);; Molecular Function: identical protein binding (GO:0042802);; Biological Process: protein homotrim…	--	--	--	Bacterial transferase hexapeptide (six repeats);; Hexapeptide repeat of succinyl-transferase	Gamma carbonic anhydrase 2, mitochondrial OS=Arabidopsis thaliana OX=3702 GN=GAMMACA2 PE=1 SV=1	S	Function unknown	Gamma carbonic anhydrase 1, mitochondrial [Zostera marina]
c1031518.graph_c0	[H]	Coenzyme transport and metabolism	--	--	--	--	RibD C-terminal domain	--	H	Coenzyme transport and metabolism	hypothetical protein LY90DRAFT_498690 [Neocallimastix californiae]
c1031538.graph_c1	--	--	--	--	--	--	--	--	--	--	hypothetical protein SPPG_02326 [Spizellomyces punctatus DAOM BR117]
c1031546.graph_c0	--	--	--	--	--	--	--	--	--	--	hypothetical protein RirG_183830 [Rhizophagus irregularis DAOM 197198w]
c1031569.graph_c0	--	--	Molecular Function: protein binding (GO:0005515);; Biological Process: DNA-templated transcription, initiation (GO:0006352);; Biological Process: transcription from RNA polymerase II promoter (GO:0006366);; Biological Process: macromolecular complex subunit organization (GO:0043933);; Cellular Component: SAGA-type complex (GO:0070461);;	K03133|7.92832e-31|egr:104414134|K03133 transcription initiation factor TFIID subunit 9B | (RefSeq) transcription initiation factor TFIID subunit 9	[K]	Transcription	Transcription initiation factor IID, 31kD subunit;; Bromodomain associated	Transcription initiation factor TFIID subunit 9 OS=Arabidopsis thaliana OX=3702 GN=TAF9 PE=1 SV=1	K	Transcription	PREDICTED: transcription initiation factor TFIID subunit 9 [Eucalyptus grandis]
c1031618.graph_c0	[O]	Posttranslational modification, protein turnover, chaperones	Molecular Function: threonine-type endopeptidase activity (GO:0004298);; Cellular Component: nucleus (GO:0005634);; Biological Process: proteasomal ubiquitin-independent protein catabolic process (GO:0010499);; Cellular Component: proteasome core complex, alpha-subunit complex (GO:0019773);; Cellular Component: proteasome storage granule (GO:0034515);; Biological Process: proteasome-mediated ubiq…	K02729|1.57058e-111|ppp:PHYPADRAFT_183899|K02729 20S proteasome subunit alpha 5 [EC:3.4.25.1] | (RefSeq) hypothetical protein	[O]	Posttranslational modification, protein turnover, chaperones	Proteasome subunit;; Proteasome subunit A N-terminal signature	Proteasome subunit alpha type-5-A OS=Arabidopsis thaliana OX=3702 GN=PAE1 PE=1 SV=1	O	Posttranslational modification, protein turnover, chaperones	proteasome core particle subunit alpha 5 [Rhizophagus irregularis DAOM 197198w]
c1031631.graph_c1	--	--	--	--	--	--	SAP domain;; Basic region leucine zipper	--	--	--	--
c1031675.graph_c0	--	--	--	--	--	--	Glucose-repressible protein Grg1	--	--	--	--
c1031686.graph_c0	--	--	Molecular Function: protein binding (GO:0005515);; Cellular Component: cell cortex (GO:0005938);; Biological Process: actin filament organization (GO:0007015);; Biological Process: cellular component assembly (GO:0022607);; Cellular Component: intracellular organelle (GO:0043229);; Biological Process: biological regulation (GO:0065007);;	K05759|2.0387e-26|mpp:MICPUCDRAFT_16052|K05759 profilin | (RefSeq) PRO; profilin	[Z]	Cytoskeleton	Profilin	Profilin-1 OS=Solanum lycopersicum OX=4081 GN=PRO1 PE=2 SV=1	O	Posttranslational modification, protein turnover, chaperones	Profilin/allergen [Rhizopus microsporus ATCC 52813]
c1031692.graph_c0	--	--	--	--	[TZ]	--	LIM domain	LIM domain-containing protein WLIM2b OS=Arabidopsis thaliana OX=3702 GN=WLIM2B PE=1 SV=1	O	Posttranslational modification, protein turnover, chaperones	hypothetical protein BCR43DRAFT_493805 [Syncephalastrum racemosum]
c1031699.graph_c0	--	--	--	--	--	--	Adenosylmethionine decarboxylase	--	I	Lipid transport and metabolism	hypothetical protein GUITHDRAFT_151406 [Guillardia theta CCMP2712]
c1031727.graph_c0	--	--	--	--	[O]	Posttranslational modification, protein turnover, chaperones	Cathepsin propeptide inhibitor domain (I29)	Cysteine proteinase 15A OS=Pisum sativum OX=3888 PE=2 SV=1	O	Posttranslational modification, protein turnover, chaperones	papain family cysteine protease containing protein [Chrysochromulina sp. CCMP291]
c1031743.graph_c0	--	--	--	--	[U]	Intracellular trafficking, secretion, and vesicular transport	Nuclear transport factor 2 (NTF2) domain	Nuclear transport factor 2B OS=Arabidopsis thaliana OX=3702 GN=NTF2B PE=1 SV=1	U	Intracellular trafficking, secretion, and vesicular transport	hypothetical protein GUITHDRAFT_79942 [Guillardia theta CCMP2712]
c1031766.graph_c0	--	--	Biological Process: cell cycle (GO:0007049);; Cellular Component: macromolecular complex (GO:0032991);; Cellular Component: intracellular organelle part (GO:0044446);; Biological Process: chromosome organization (GO:0051276);;	K06676|2.4755e-61|csv:101210228|K06676 condensin complex subunit 2 | (RefSeq) condensin complex subunit 2	[BD]	--	Condensin complex subunit 2	Condensin complex subunit 2 OS=Arabidopsis thaliana OX=3702 GN=CAPH PE=1 SV=1	BD	--	barren [Basidiobolus meristosporus CBS 931.73]
c1031771.graph_c0	--	--	Molecular Function: RNA binding (GO:0003723);; Molecular Function: ATP-dependent RNA helicase activity (GO:0004004);; Molecular Function: ATP binding (GO:0005524);; Biological Process: RNA secondary structure unwinding (GO:0010501);;	K13179|4.02899e-21|pper:PRUPE_ppa003191mg|K13179 ATP-dependent RNA helicase DDX18/HAS1 [EC:3.6.4.13] | (RefSeq) hypothetical protein	[A]	RNA processing and modification	--	DEAD-box ATP-dependent RNA helicase 27 OS=Oryza sativa subsp. japonica OX=39947 GN=Os03g0802700 PE=3 SV=1	L	Replication, recombination and repair	DEAD-box ATP-dependent RNA helicase 27-like, partial [Prunus avium]
c1031785.graph_c0	[P]	Inorganic ion transport and metabolism	Biological Process: metabolic process (GO:0008152);;	K04564|1.27622e-64|bvg:104887645|K04564 superoxide dismutase, Fe-Mn family [EC:1.15.1.1] | (RefSeq) superoxide dismutase [Mn], mitochondrial-like	[P]	Inorganic ion transport and metabolism	Iron/manganese superoxide dismutases, C-terminal domain;; Iron/manganese superoxide dismutases, alpha-hairpin domain	Superoxide dismutase [Mn], mitochondrial OS=Hevea brasiliensis OX=3981 GN=SODA PE=2 SV=1	P	Inorganic ion transport and metabolism	hypothetical protein SPPG_04974 [Spizellomyces punctatus DAOM BR117]
c1031808.graph_c0	--	--	--	K03232|1.33311e-07|gsl:Gasu_19580|K03232 elongation factor 1-beta | (RefSeq) elongation factor EF-1 beta subunit	[K]	Transcription	EF-1 guanine nucleotide exchange domain	--	--	--	elongation factor EF-1 beta subunit [Galdieria sulphuraria]
c1031837.graph_c0	--	--	Biological Process: phosphorelay signal transduction system (GO:0000160);; Cellular Component: nucleus (GO:0005634);; Cellular Component: cytoplasm (GO:0005737);; Biological Process: cytokinin-activated signaling pathway (GO:0009736);; Molecular Function: histidine phosphotransfer kinase activity (GO:0009927);; Biological Process: phosphorylation (GO:0016310);; Molecular Function: protein histidi…	K14490|2.41364e-47|adu:107475892|K14490 histidine-containing phosphotransfer peotein | (RefSeq) histidine-containing phosphotransfer protein 1-like	[T]	Signal transduction mechanisms	Hpt domain	Histidine-containing phosphotransfer protein 3 OS=Arabidopsis thaliana OX=3702 GN=AHP3 PE=1 SV=2	T	Signal transduction mechanisms	histidine-containing phosphotransfer protein 1 isoform X1 [Arachis duranensis]
c1031858.graph_c0	--	--	--	--	[S]	Function unknown	Ribosome biogenesis protein Nop16	--	S	Function unknown	hypothetical protein AV274_6258 [Blastocystis sp. ATCC 50177/Nand II]
c1031893.graph_c0	--	--	--	K11275|4.32177e-06|mis:MICPUN_113606|K11275 histone H1/5 | (RefSeq) hypothetical protein	--	--	linker histone H1 and H5 family;; WWE domain	--	S	Function unknown	hypothetical protein Ctob_014739 [Chrysochromulina sp. CCMP291]
c1031910.graph_c0	[K]	Transcription	--	--	[T]	Signal transduction mechanisms	Leucine rich repeat;; Leucine Rich repeats (2 copies);; Leucine Rich Repeat;; Leucine Rich repeat	Plant intracellular Ras-group-related LRR protein 4 OS=Arabidopsis thaliana OX=3702 GN=PIRL4 PE=1 SV=1	S	Function unknown	predicted protein [Micromonas commoda]
c1031925.graph_c0	--	--	--	--	[TW]	--	EGF-like domain	--	S	Function unknown	tubular mastigoneme protein [Ochromonas danica]
c1031966.graph_c0	--	--	Biological Process: cellular bud site selection (GO:0000282);; Biological Process: mRNA splicing, via spliceosome (GO:0000398);; Cellular Component: U2-type spliceosomal complex (GO:0005684);; Cellular Component: U2 snRNP (GO:0005686);;	K12873|4.69786e-64|ppp:PHYPADRAFT_177335|K12873 bud site selection protein 31 | (RefSeq) hypothetical protein	[K]	Transcription	Vacuolar import and degradation protein	Protein BUD31 homolog 2 OS=Oryza sativa subsp. japonica OX=39947 GN=Os05g0446300 PE=2 SV=1	DK	--	hypothetical protein K493DRAFT_210134 [Basidiobolus meristosporus CBS 931.73]
c1032059.graph_c1	[L]	Replication, recombination and repair	Molecular Function: nucleic acid binding (GO:0003676);; Molecular Function: ATP-dependent RNA helicase activity (GO:0004004);; Molecular Function: ATP binding (GO:0005524);; Cellular Component: nuclear envelope (GO:0005635);; Cellular Component: cytoplasm (GO:0005737);; Biological Process: mRNA export from nucleus (GO:0006406);; Biological Process: RNA secondary structure unwinding (GO:0010501);;…	K18655|1.06748e-38|gsl:Gasu_34010|K18655 ATP-dependent RNA helicase DDX19/DBP5 [EC:3.6.4.13] | (RefSeq) ATP-dependent RNA helicase	[A]	RNA processing and modification	Helicase conserved C-terminal domain	Eukaryotic initiation factor 4A-6 (Fragment) OS=Nicotiana tabacum OX=4097 PE=2 SV=1	L	Replication, recombination and repair	hypothetical protein BOTBODRAFT_33594 [Botryobasidium botryosum FD-172 SS1]
c1032062.graph_c0	--	--	Molecular Function: binding (GO:0005488);;	--	--	--	RNA recognition motif. (a.k.a. RRM, RBD, or RNP domain)	Binding partner of ACD11 1 OS=Arabidopsis thaliana OX=3702 GN=BPA1 PE=1 SV=1	S	Function unknown	hypothetical protein H072_2467 [Dactylellina haptotyla CBS 200.50]
c1032100.graph_c0	[J]	Translation, ribosomal structure and biogenesis	Biological Process: cytoplasmic translational elongation (GO:0002182);; Molecular Function: structural constituent of ribosome (GO:0003735);; Cellular Component: cytosolic large ribosomal subunit (GO:0022625);; Cellular Component: preribosome, large subunit precursor (GO:0030687);; Molecular Function: large ribosomal subunit rRNA binding (GO:0070180);;	K02943|3.1497e-12|cre:CHLREDRAFT_195600|K02943 large subunit ribosomal protein LP2 | (RefSeq) RPP2; acidic ribosomal protein P2	[J]	Translation, ribosomal structure and biogenesis	60s Acidic ribosomal protein	--	J	Translation, ribosomal structure and biogenesis	60S acidic ribosomal protein P2B [Schizosaccharomyces pombe]
c1032118.graph_c0	[R]	General function prediction only	Molecular Function: GTP binding (GO:0005525);; Cellular Component: intracellular (GO:0005622);; Biological Process: small GTPase mediated signal transduction (GO:0007264);;	K07877|2.25995e-76|smo:SELMODRAFT_439463|K07877 Ras-related protein Rab-2A | (RefSeq) Rab2-1; rab family GTPase	[U]	Intracellular trafficking, secretion, and vesicular transport	Ras family;; Ras of Complex, Roc, domain of DAPkinase;; ADP-ribosylation factor family	GTP-binding protein yptV4 OS=Volvox carteri OX=3067 GN=YPTV4 PE=3 SV=1	S	Function unknown	ras-domain-containing protein [Mortierella elongata AG-77]
c1032125.graph_c0	--	--	--	--	[TR]	--	BTG family	--	S	Function unknown	hypothetical protein BCR43DRAFT_488762 [Syncephalastrum racemosum]
c1032135.graph_c0	--	--	--	--	--	--	--	--	S	Function unknown	hypothetical protein CVT26_012021 [Gymnopilus dilepis]
c1032178.graph_c0	--	--	Cellular Component: membrane (GO:0016020);;	K12670|9.43834e-108|vra:106756618|K12670 oligosaccharyltransferase complex subunit beta | (RefSeq) dolichyl-diphosphooligosaccharide--protein glycosyltransferase 48 kDa subunit	[O]	Posttranslational modification, protein turnover, chaperones	Oligosaccharyltransferase 48 kDa subunit beta	Dolichyl-diphosphooligosaccharide--protein glycosyltransferase 48 kDa subunit OS=Oryza sativa subsp. japonica OX=39947 GN=OST48 PE=2 SV=1	S	Function unknown	dolichyl-diphosphooligosaccharide--protein glycosyltransferase 48 kDa subunit-like [Carica papaya]
c1032179.graph_c0	[O]	Posttranslational modification, protein turnover, chaperones	--	K17609|2.06374e-31|mis:MICPUN_60331|K17609 nucleoredoxin [EC:1.8.1.8] | (RefSeq) TRX_2; thioredoxin	[R]	General function prediction only	Thioredoxin-like;; Thioredoxin;; Thioredoxin-like domain;; AhpC/TSA family	Probable nucleoredoxin 1 OS=Arabidopsis thaliana OX=3702 GN=At1g60420 PE=1 SV=1	O	Posttranslational modification, protein turnover, chaperones	hypothetical protein PPTG_08221 [Phytophthora parasitica INRA-310]
c1032283.graph_c0	--	--	--	--	--	--	WH2 motif	--	--	--	hypothetical protein VOLCADRAFT_104335 [Volvox carteri f. nagariensis]
c1032289.graph_c0	[O]	Posttranslational modification, protein turnover, chaperones	Molecular Function: peptidyl-prolyl cis-trans isomerase activity (GO:0003755);; Molecular Function: FK506 binding (GO:0005528);; Cellular Component: endoplasmic reticulum membrane (GO:0005789);; Biological Process: chaperone-mediated protein folding (GO:0061077);;	K09569|3.02182e-42|csl:COCSUDRAFT_25703|K09569 FK506-binding protein 2 [EC:5.2.1.8] | (RefSeq) hypothetical protein	[O]	Posttranslational modification, protein turnover, chaperones	FKBP-type peptidyl-prolyl cis-trans isomerase	Peptidyl-prolyl cis-trans isomerase FKBP15-2 OS=Arabidopsis thaliana OX=3702 GN=FKBP15-2 PE=2 SV=2	O	Posttranslational modification, protein turnover, chaperones	hypothetical protein BD324DRAFT_398010 [Kockovaella imperatae]
c1032319.graph_c0	[C]	Energy production and conversion	Molecular Function: NADPH dehydrogenase activity (GO:0003959);; Cellular Component: intracellular (GO:0005622);; Molecular Function: FMN binding (GO:0010181);; Biological Process: oxidation-reduction process (GO:0055114);;	K05894|4.80793e-112|smo:SELMODRAFT_173572|K05894 12-oxophytodienoic acid reductase [EC:1.3.1.42] | (RefSeq) hypothetical protein	[CR]	--	NADH:flavin oxidoreductase / NADH oxidase family	12-oxophytodienoate reductase 1 OS=Oryza sativa subsp. japonica OX=39947 GN=OPR1 PE=2 SV=1	C	Energy production and conversion	12-oxophytodienoate reductase [Phytophthora palmivora var. palmivora]
c1032338.graph_c0	--	--	Molecular Function: cytochrome-c oxidase activity (GO:0004129);; Cellular Component: mitochondrial respiratory chain complex IV (GO:0005751);; Biological Process: hydrogen ion transmembrane transport (GO:1902600);;	--	--	--	Cytochrome c oxidase subunit VIa	--	O	Posttranslational modification, protein turnover, chaperones	hypothetical protein RSOLAG22IIIB_06381 [Rhizoctonia solani]
c1032378.graph_c0	--	--	--	--	--	--	Domain of unknown function (DUF4360)	--	S	Function unknown	hypothetical protein CTHT_0047050 [Chaetomium thermophilum var. thermophilum DSM 1495]
c1032389.graph_c0	[G]	Carbohydrate transport and metabolism	Molecular Function: ribulose-phosphate 3-epimerase activity (GO:0004750);; Cellular Component: cytosol (GO:0005829);; Biological Process: pentose-phosphate shunt, non-oxidative branch (GO:0009052);; Biological Process: pentose catabolic process (GO:0019323);; Biological Process: cellular carbohydrate metabolic process (GO:0044262);; Molecular Function: metal ion binding (GO:0046872);;	K01783|4.86119e-89|pmum:103330356|K01783 ribulose-phosphate 3-epimerase [EC:5.1.3.1] | (RefSeq) ribulose-phosphate 3-epimerase, cytoplasmic isoform	[G]	Carbohydrate transport and metabolism	Ribulose-phosphate 3 epimerase family	Ribulose-phosphate 3-epimerase, cytoplasmic isoform OS=Oryza sativa subsp. japonica OX=39947 GN=Os09g0505700 PE=1 SV=1	G	Carbohydrate transport and metabolism	ribulose-phosphate 3-epimerase [Pythium insidiosum]
c1032392.graph_c0	--	--	Cellular Component: intracellular part (GO:0044424);;	K02918|1.0474e-20|csl:COCSUDRAFT_28397|K02918 large subunit ribosomal protein L35e | (RefSeq) hypothetical protein	[J]	Translation, ribosomal structure and biogenesis	Ribosomal L29 protein	60S ribosomal protein L35 OS=Triticum aestivum OX=4565 GN=RPL35 PE=1 SV=1	J	Translation, ribosomal structure and biogenesis	hypothetical protein PIROE2DRAFT_67108 [Piromyces sp. E2]
c1032436.graph_c0	[J]	Translation, ribosomal structure and biogenesis	Molecular Function: nucleic acid binding (GO:0003676);; Molecular Function: protein binding (GO:0005515);; Cellular Component: nucleus (GO:0005634);; Cellular Component: cytosol (GO:0005829);; Cellular Component: intracellular ribonucleoprotein complex (GO:0030529);; Biological Process: mitotic G1 DNA damage checkpoint (GO:0031571);; Biological Process: regulation of cytoplasmic translational ini…	K03237|2.87454e-58|fve:101304405|K03237 translation initiation factor 2 subunit 1 | (RefSeq) eukaryotic translation initiation factor 2 subunit alpha-like	[J]	Translation, ribosomal structure and biogenesis	Eukaryotic translation initiation factor 2 alpha subunit;; S1 RNA binding domain	Eukaryotic translation initiation factor 2 subunit alpha homolog OS=Arabidopsis thaliana OX=3702 GN=At2g40290 PE=1 SV=2	J	Translation, ribosomal structure and biogenesis	eukaryotic translation initiation factor 2 subunit alpha [Conidiobolus coronatus NRRL 28638]
c1032457.graph_c0	--	--	--	--	--	--	Stathmin family	--	--	--	--
c1032465.graph_c0	--	--	Molecular Function: binding (GO:0005488);; Biological Process: translational initiation (GO:0006413);; Cellular Component: intracellular ribonucleoprotein complex (GO:0030529);; Cellular Component: cytoplasmic part (GO:0044444);;	K03113|6.40025e-36|egr:104424767|K03113 translation initiation factor 1 | (RefSeq) protein translation factor SUI1 homolog 2	[J]	Translation, ribosomal structure and biogenesis	Translation initiation factor SUI1	Protein translation factor SUI1 homolog 2 OS=Arabidopsis thaliana OX=3702 GN=At1g54290 PE=3 SV=1	J	Translation, ribosomal structure and biogenesis	protein translation factor sui1 [Mortierella verticillata NRRL 6337]
c1032472.graph_c0	[I]	Lipid transport and metabolism	--	--	[I]	Lipid transport and metabolism	SCP-2 sterol transfer family	--	S	Function unknown	unknown [Picea sitchensis]
c1032487.graph_c0	--	--	Cellular Component: cytoplasmic part (GO:0044444);; Molecular Function: phosphatidylinositol phosphate binding (GO:1901981);;	K03626|2.08949e-25|sbi:SORBI_01g035320|K03626 nascent polypeptide-associated complex subunit alpha | (RefSeq) SORBIDRAFT_01g035320, Sb01g035320; hypothetical protein	[K]	Transcription	NAC domain	Nascent polypeptide-associated complex subunit alpha-like protein OS=Pinus taeda OX=3352 PE=2 SV=1	K	Transcription	hypothetical protein M422DRAFT_51893 [Sphaerobolus stellatus SS14]
c1032489.graph_c0	[R]	General function prediction only	Cellular Component: chloroplast (GO:0009507);; Cellular Component: plastid part (GO:0044435);;	--	--	--	PB1 domain	Protein MET1, chloroplastic OS=Arabidopsis thaliana OX=3702 GN=MET1 PE=1 SV=1	S	Function unknown	hypothetical protein F751_2865 [Auxenochlorella protothecoides]
c1032501.graph_c0	--	--	--	--	[R]	General function prediction only	PPR repeat family;; PPR repeat;; Pentatricopeptide repeat domain;; PPR repeat;; Pentacotripeptide-repeat region of PRORP;; Tetratricopeptide repeat;; Tetratricopeptide repeat	Pentatricopeptide repeat-containing protein At5g02860 OS=Arabidopsis thaliana OX=3702 GN=At5g02860 PE=2 SV=1	S	Function unknown	Tetratricopeptide-like helical domain containing protein [Parasponia andersonii]
c1032534.graph_c0	--	--	Cellular Component: integral component of membrane (GO:0016021);;	--	--	--	--	--	--	--	Hypothetical protein PINS_011321 [Pythium insidiosum]
c1032547.graph_c0	[J]	Translation, ribosomal structure and biogenesis	Biological Process: rRNA modification (GO:0000154);; Molecular Function: snoRNA binding (GO:0030515);; Cellular Component: 90S preribosome (GO:0030686);; Cellular Component: box C/D snoRNP complex (GO:0031428);; Cellular Component: small-subunit processome (GO:0032040);;	K14564|4.16294e-50|ccp:CHC_T00009207001|K14564 nucleolar protein 56 | (RefSeq) box C/D snoRNP component Nop56	[AJ]	--	--	Probable nucleolar protein 5-2 OS=Arabidopsis thaliana OX=3702 GN=NOP5-2 PE=1 SV=1	J	Translation, ribosomal structure and biogenesis	hypothetical protein BC1G_16079 [Botrytis cinerea B05.10]
c1032559.graph_c0	--	--	Molecular Function: binding (GO:0005488);;	K12818|2.43958e-11|ath:AT5G10370|K12818 ATP-dependent RNA helicase DHX8/PRP22 [EC:3.6.4.13] | (RefSeq) helicase domain-containing protein / IBR domain-containing protein / zinc finger protein-like protein	[O]	Posttranslational modification, protein turnover, chaperones	IBR domain, a half RING-finger domain	ATP-dependent RNA helicase DEAH12, chloroplastic OS=Arabidopsis thaliana OX=3702 GN=At5g10370 PE=3 SV=1	S	Function unknown	hypothetical protein A0H81_08174 [Grifola frondosa]
c1032595.graph_c0	[J]	Translation, ribosomal structure and biogenesis	Biological Process: ribosomal large subunit assembly (GO:0000027);; Molecular Function: mRNA binding (GO:0003729);; Molecular Function: structural constituent of ribosome (GO:0003735);; Molecular Function: protein binding (GO:0005515);; Cellular Component: nucleolus (GO:0005730);; Biological Process: translation (GO:0006412);; Biological Process: auxin-activated signaling pathway (GO:0009734);; C…	K02896|8.72039e-38|brp:103867272|K02896 large subunit ribosomal protein L24e | (RefSeq) 60S ribosomal protein L24-1	[J]	Translation, ribosomal structure and biogenesis	Ribosomal protein L24e	60S ribosomal protein L24-2 OS=Arabidopsis thaliana OX=3702 GN=RPL24B PE=1 SV=2	J	Translation, ribosomal structure and biogenesis	predicted protein [Hordeum vulgare subsp. vulgare]
c1032659.graph_c0	--	--	Molecular Function: core promoter sequence-specific DNA binding (GO:0001046);; Molecular Function: transcriptional activator activity, RNA polymerase II transcription regulatory region sequence-specific binding (GO:0001228);; Cellular Component: nucleus (GO:0005634);; Biological Process: positive regulation of transcription from RNA polymerase II promoter (GO:0045944);; Molecular Function: protei…	--	--	--	--	Transcription factor bHLH130 OS=Arabidopsis thaliana OX=3702 GN=BHLH130 PE=1 SV=1	K	Transcription	PREDICTED: transcription factor bHLH130-like [Glycine max]
c1032666.graph_c0	--	--	Cellular Component: cytosol (GO:0005829);;	K02896|8.46714e-16|olu:OSTLU_43138|K02896 large subunit ribosomal protein L24e | (RefSeq) RPL24; Ribosomal protein L24, component of cytosolic 80S ribosome and 60S large subunit	[J]	Translation, ribosomal structure and biogenesis	Ribosomal protein L24e	60S ribosomal protein L24-2 OS=Arabidopsis thaliana OX=3702 GN=RPL24B PE=1 SV=2	J	Translation, ribosomal structure and biogenesis	hypothetical protein AMAG_08547 [Allomyces macrogynus ATCC 38327]
c1032694.graph_c0	--	--	Biological Process: translation (GO:0006412);;	K03232|5.77333e-06|pda:103715367|K03232 elongation factor 1-beta | (RefSeq) elongation factor 1-delta-like	[K]	Transcription	EF-1 guanine nucleotide exchange domain	--	J	Translation, ribosomal structure and biogenesis	hypothetical protein B0A48_03019 [Rachicladosporium antarcticum]
c1032782.graph_c0	--	--	Cellular Component: membrane (GO:0016020);;	K17086|0|rcu:8266964|K17086 transmembrane 9 superfamily member 2/4 | (RefSeq) transmembrane 9 superfamily member 7	[U]	Intracellular trafficking, secretion, and vesicular transport	Endomembrane protein 70	Transmembrane 9 superfamily member 7 OS=Arabidopsis thaliana OX=3702 GN=TMN7 PE=2 SV=1	S	Function unknown	transmembrane 9 superfamily member 7 [Manihot esculenta]
c1032834.graph_c0	--	--	Biological Process: mRNA splicing, via spliceosome (GO:0000398);; Molecular Function: ribose-5-phosphate isomerase activity (GO:0004751);; Molecular Function: calcium ion binding (GO:0005509);; Cellular Component: U2 snRNP (GO:0005686);; Cellular Component: U12-type spliceosomal complex (GO:0005689);; Biological Process: pentose-phosphate shunt, non-oxidative branch (GO:0009052);; Cellular Compon…	K12834|1.21527e-66|csl:COCSUDRAFT_20140|K12834 PHD finger-like domain-containing protein 5A | (RefSeq) PHF5-like protein	[S]	Function unknown	PHF5-like protein	PHD finger-like domain-containing protein 5B OS=Arabidopsis thaliana OX=3702 GN=At1g07170 PE=3 SV=1	A	RNA processing and modification	Rds3p [Rhizophagus irregularis DAOM 197198w]
c1032845.graph_c0	--	--	--	--	--	--	DOMON domain;; Eukaryotic cytochrome b561	--	--	--	hypothetical protein, variant 1 [Batrachochytrium dendrobatidis JEL423]
c1032876.graph_c0	[O]	Posttranslational modification, protein turnover, chaperones	--	K11416|1.73122e-59|ppp:PHYPADRAFT_172495|K11416 mono-ADP-ribosyltransferase sirtuin 6 [EC:2.4.2.31] | (RefSeq) SRT1502; class IV sirtuin	[BK]	--	Sir2 family;; Zn-finger in ubiquitin-hydrolases and other protein	NAD-dependent protein deacetylase SRT1 OS=Oryza sativa subsp. indica OX=39946 GN=SRT1 PE=2 SV=1	K	Transcription	hypothetical protein KFL_000800315 [Klebsormidium nitens]
c1032887.graph_c0	--	--	--	--	--	--	Protein of unknown function (DUF3339)	--	--	--	--
c1032904.graph_c0	--	--	--	--	[Q]	Secondary metabolites biosynthesis, transport and catabolism	--	--	--	--	--
c1032906.graph_c0	--	--	--	--	--	--	--	--	--	--	succinate dehydrogenase cytochrome b560 subunit [Lobosporangium transversale]
c1032916.graph_c0	--	--	--	--	[U]	Intracellular trafficking, secretion, and vesicular transport	Got1/Sft2-like family	--	U	Intracellular trafficking, secretion, and vesicular transport	er-to-golgi vesicle protein transport sft2 [Moniliophthora roreri MCA 2997]
c1032932.graph_c0	[C]	Energy production and conversion	--	K00311|0|pper:PRUPE_ppa002564mg|K00311 electron-transferring-flavoprotein dehydrogenase [EC:1.5.5.1] | (RefSeq) hypothetical protein	[C]	Energy production and conversion	Electron transfer flavoprotein-ubiquinone oxidoreductase, 4Fe-4S	Electron transfer flavoprotein-ubiquinone oxidoreductase, mitochondrial OS=Oryza sativa subsp. japonica OX=39947 GN=Os10g0516300 PE=3 SV=1	C	Energy production and conversion	hypothetical protein LRAMOSA08912 [Lichtheimia ramosa]
c1032945.graph_c0	--	--	Molecular Function: metal ion binding (GO:0046872);;	K09250|4.44735e-19|ath:AT4G36020|K09250 cellular nucleic acid-binding protein | (RefSeq) CSDP1; cold shock domain protein 1	[J]	Translation, ribosomal structure and biogenesis	Zinc knuckle;; Zinc knuckle;; Zinc knuckle;; Zinc knuckle	Cold shock protein 1 OS=Arabidopsis thaliana OX=3702 GN=CSP1 PE=1 SV=1	OU	--	hypothetical protein PPTG_01924 [Phytophthora parasitica INRA-310]
c1032953.graph_c0	--	--	Molecular Function: structural constituent of ribosome (GO:0003735);; Cellular Component: ribosome (GO:0005840);; Biological Process: translation (GO:0006412);;	K02891|4.5083e-30|mis:MICPUN_90144|K02891 large subunit ribosomal protein L22e | (RefSeq) hypothetical protein	[J]	Translation, ribosomal structure and biogenesis	Ribosomal L22e protein family	Putative 60S ribosomal protein L22-1 OS=Arabidopsis thaliana OX=3702 GN=RPL22A PE=3 SV=1	J	Translation, ribosomal structure and biogenesis	60S ribosomal protein L22 2 OS=Dictyostelium discoideum GN=rpl22a PE=3 SV=1 [Rhizoctonia solani AG-1 IB]
c1032954.graph_c0	[J]	Translation, ribosomal structure and biogenesis	Molecular Function: structural constituent of ribosome (GO:0003735);; Cellular Component: ribosome (GO:0005840);; Biological Process: translation (GO:0006412);;	K02955|1.65836e-58|atr:18441266|K02955 small subunit ribosomal protein S14e | (RefSeq) 40S ribosomal protein S14	[J]	Translation, ribosomal structure and biogenesis	Ribosomal protein S11	40S ribosomal protein S14 OS=Zea mays OX=4577 PE=3 SV=1	J	Translation, ribosomal structure and biogenesis	40S ribosomal protein S14-like [Amborella trichopoda]
c1032993.graph_c0	--	--	--	--	[S]	Function unknown	SH3 domain;; Variant SH3 domain;; Variant SH3 domain	--	S	Function unknown	hypothetical protein SH3 [Aspergillus fumigatus var. RP-2014]
c1033007.graph_c0	--	--	--	--	[R]	General function prediction only	PPR repeat family;; PPR repeat;; PPR repeat;; Pentatricopeptide repeat domain;; Pentacotripeptide-repeat region of PRORP;; Tetratricopeptide repeat;; Tetratricopeptide repeat	Pentatricopeptide repeat-containing protein At5g39710 OS=Arabidopsis thaliana OX=3702 GN=EMB2745 PE=2 SV=1	S	Function unknown	PPR domain-containing protein/PPR_1 domain-containing protein/PPR_2 domain-containing protein, partial [Cephalotus follicularis]
c1033010.graph_c1	--	--	--	--	--	--	Poly(ADP-ribose) polymerase and DNA-Ligase Zn-finger region	--	S	Function unknown	zf-PARP-domain-containing protein [Basidiobolus meristosporus CBS 931.73]
c1033037.graph_c0	[J]	Translation, ribosomal structure and biogenesis	Molecular Function: RNA binding (GO:0003723);; Molecular Function: structural constituent of ribosome (GO:0003735);; Biological Process: translation (GO:0006412);; Cellular Component: cytosolic large ribosomal subunit (GO:0022625);;	K02883|3.55308e-63|cre:CHLREDRAFT_195589|K02883 large subunit ribosomal protein L18e | (RefSeq) RPL18; ribosomal protein L18, component of cytosolic 80S ribosome and 60S large subunit	[J]	Translation, ribosomal structure and biogenesis	Ribosomal protein 60S L18 and 50S L18e;; Ribosomal proteins 50S-L15, 50S-L18e, 60S-L27A	60S ribosomal protein L18-3 OS=Arabidopsis thaliana OX=3702 GN=RPL18C PE=2 SV=1	J	Translation, ribosomal structure and biogenesis	ribosomal protein L18e [Basidiobolus meristosporus CBS 931.73]
c1033038.graph_c0	--	--	--	K11426|4.31327e-11|sot:102594965|K11426 SET and MYND domain-containing protein | (RefSeq) histone-lysine N-methyltransferase ASHR1	[B]	Chromatin structure and dynamics	MYND finger	Histone-lysine N-methyltransferase ASHR1 OS=Arabidopsis thaliana OX=3702 GN=ASHR1 PE=1 SV=2	S	Function unknown	PREDICTED: histone-lysine N-methyltransferase ASHR1 isoform X1 [Solanum tuberosum]
c1033039.graph_c1	--	--	Cellular Component: nucleus (GO:0005634);; Cellular Component: cytosol (GO:0005829);; Cellular Component: fatty acid elongase complex (GO:0009923);; Cellular Component: integral component of membrane (GO:0016021);; Biological Process: cell differentiation (GO:0030154);; Biological Process: very long-chain fatty acid biosynthetic process (GO:0042761);; Biological Process: negative regulation of de…	K10703|1.28287e-40|bna:106430302|K10703 very-long-chain (3R)-3-hydroxyacyl-CoA dehydratase [EC:4.2.1.134] | (RefSeq) very-long-chain (3R)-3-hydroxyacyl-CoA dehydratase PASTICCINO 2-like	[R]	General function prediction only	Protein tyrosine phosphatase-like protein, PTPLA	Very-long-chain (3R)-3-hydroxyacyl-CoA dehydratase PASTICCINO 2 OS=Arabidopsis thaliana OX=3702 GN=PAS2 PE=1 SV=1	S	Function unknown	tyrosine phosphatase-like protein [Syncephalastrum racemosum]
c1033062.graph_c0	[C]	Energy production and conversion	Molecular Function: cytochrome-b5 reductase activity, acting on NAD(P)H (GO:0004128);; Biological Process: oxidation-reduction process (GO:0055114);;	K00326|1.39216e-92|csl:COCSUDRAFT_30343|K00326 cytochrome-b5 reductase [EC:1.6.2.2] | (RefSeq) cytochrome-b5 reductase like protein	[HC]	--	Oxidoreductase NAD-binding domain;; Oxidoreductase FAD-binding domain;; Ferric reductase NAD binding domain	NADH-cytochrome b5 reductase-like protein OS=Arabidopsis thaliana OX=3702 GN=CBR2 PE=1 SV=2	C	Energy production and conversion	NADH-cytochrome b5 reductase [Phytophthora megakarya]
c1033063.graph_c1	--	--	Molecular Function: RNA binding (GO:0003723);; Molecular Function: structural constituent of ribosome (GO:0003735);; Biological Process: translation (GO:0006412);; Cellular Component: cytosolic large ribosomal subunit (GO:0022625);;	K02883|2.60077e-31|bpg:Bathy10g01350|K02883 large subunit ribosomal protein L18e | (RefSeq) hypothetical protein	[J]	Translation, ribosomal structure and biogenesis	Ribosomal protein 60S L18 and 50S L18e	60S ribosomal protein L18-3 OS=Arabidopsis thaliana OX=3702 GN=RPL18C PE=2 SV=1	J	Translation, ribosomal structure and biogenesis	predicted protein [Bathycoccus prasinos]
c1033080.graph_c0	--	--	--	--	--	--	--	--	S	Function unknown	hypothetical protein JCGZ_06007 [Jatropha curcas]
c1033094.graph_c0	[J]	Translation, ribosomal structure and biogenesis	Molecular Function: structural constituent of ribosome (GO:0003735);; Molecular Function: rRNA binding (GO:0019843);; Cellular Component: cytosolic small ribosomal subunit (GO:0022627);; Biological Process: positive regulation of translational fidelity (GO:0045903);;	K02997|5.31331e-71|ppp:PHYPADRAFT_159560|K02997 small subunit ribosomal protein S9e | (RefSeq) hypothetical protein	[J]	Translation, ribosomal structure and biogenesis	S4 domain;; Ribosomal protein S4/S9 N-terminal domain	40S ribosomal protein S9-1 OS=Arabidopsis thaliana OX=3702 GN=RPS9B PE=1 SV=1	J	Translation, ribosomal structure and biogenesis	hypothetical protein AXG93_1154s1090 [Marchantia polymorpha subsp. ruderalis]
c1033095.graph_c0	[J]	Translation, ribosomal structure and biogenesis	Molecular Function: RNA binding (GO:0003723);; Molecular Function: structural constituent of ribosome (GO:0003735);; Biological Process: translation (GO:0006412);; Cellular Component: cytosolic large ribosomal subunit (GO:0022625);;	K02924|4.44867e-17|atr:18438508|K02924 large subunit ribosomal protein L39e | (RefSeq) 60S ribosomal protein L39	[J]	Translation, ribosomal structure and biogenesis	--	60S ribosomal protein L39-2 OS=Arabidopsis thaliana OX=3702 GN=RPL39B PE=3 SV=1	J	Translation, ribosomal structure and biogenesis	60S ribosomal protein L39 [Amborella trichopoda]
c1033105.graph_c3	[H]	Coenzyme transport and metabolism	Molecular Function: adenosylhomocysteinase activity (GO:0004013);; Cellular Component: cytosol (GO:0005829);; Biological Process: one-carbon metabolic process (GO:0006730);; Biological Process: S-adenosylmethionine cycle (GO:0033353);;	K01251|4.30913e-58|gsl:Gasu_07910|K01251 adenosylhomocysteinase [EC:3.3.1.1] | (RefSeq) adenosylhomocysteinase	[H]	Coenzyme transport and metabolism	S-adenosyl-L-homocysteine hydrolase;; S-adenosyl-L-homocysteine hydrolase, NAD binding domain	Adenosylhomocysteinase OS=Petroselinum crispum OX=4043 GN=SAHH PE=2 SV=2	H	Coenzyme transport and metabolism	adenosylhomocysteinase [Galdieria sulphuraria]
c1033166.graph_c0	[E]	Amino acid transport and metabolism	Biological Process: methionine biosynthetic process (GO:0009086);; Molecular Function: hydrolase activity (GO:0016787);; Molecular Function: metal ion binding (GO:0046872);;	K16054|1.5041e-79|pda:103696410|K16054 methylthioribulose 1-phosphate dehydratase / enolase-phosphatase E1 [EC:4.2.1.109 3.1.3.77] | (RefSeq) probable bifunctional methylthioribulose-1-phosphate dehydratase/enolase-phosphatase E1	[E]	Amino acid transport and metabolism	haloacid dehalogenase-like hydrolase;; Haloacid dehalogenase-like hydrolase	Probable bifunctional methylthioribulose-1-phosphate dehydratase/enolase-phosphatase E1 OS=Oryza sativa subsp. indica OX=39946 GN=OsI_36120 PE=2 SV=1	C	Energy production and conversion	2,3-diketo-5-methylthio-1-phosphopentane phosphatase [Basidiobolus meristosporus CBS 931.73]
c1033242.graph_c0	[VI]	--	Molecular Function: glutathione peroxidase activity (GO:0004602);; Cellular Component: nucleus (GO:0005634);; Cellular Component: cytosol (GO:0005829);; Biological Process: sulfur compound metabolic process (GO:0006790);; Molecular Function: thioredoxin peroxidase activity (GO:0008379);; Biological Process: removal of superoxide radicals (GO:0019430);; Cellular Component: extrinsic component of m…	K00432|2.22362e-74|vcn:VOLCADRAFT_79644|K00432 glutathione peroxidase [EC:1.11.1.9] | (RefSeq) gpx2; glutathione peroxidase	[O]	Posttranslational modification, protein turnover, chaperones	Glutathione peroxidase;; AhpC/TSA family	Probable phospholipid hydroperoxide glutathione peroxidase 6, mitochondrial OS=Arabidopsis thaliana OX=3702 GN=GPX6 PE=2 SV=2	O	Posttranslational modification, protein turnover, chaperones	Glutathione peroxidase 2 [[Candida] glabrata]
c1033267.graph_c0	[M]	Cell wall/membrane/envelope biogenesis	--	K03098|1.67613e-13|ppp:PHYPADRAFT_114767|K03098 apolipoprotein D and lipocalin family protein | (RefSeq) hypothetical protein	[M]	Cell wall/membrane/envelope biogenesis	Lipocalin-like domain;; Lipocalin / cytosolic fatty-acid binding protein family	Temperature-induced lipocalin-1 OS=Arabidopsis thaliana OX=3702 GN=TIL PE=1 SV=1	M	Cell wall/membrane/envelope biogenesis	lipocalin-like lipo protein [Ostreococcus tauri]
c1033306.graph_c0	[K]	Transcription	Molecular Function: DNA binding (GO:0003677);; Biological Process: regulation of transcription, DNA-templated (GO:0006355);; Molecular Function: zinc ion binding (GO:0008270);;	--	[J]	Translation, ribosomal structure and biogenesis	'Cold-shock' DNA-binding domain;; Ribonuclease B OB domain	Glycine-rich protein 2 OS=Nicotiana sylvestris OX=4096 GN=GRP-2 PE=2 SV=1	K	Transcription	hypothetical protein KFL_000340370, partial [Klebsormidium nitens]
c1033312.graph_c0	--	--	Cellular Component: cytoplasm (GO:0005737);; Biological Process: vacuolar transport (GO:0007034);;	K12198|3.4636e-36|ppp:PHYPADRAFT_163299|K12198 charged multivesicular body protein 5 | (RefSeq) hypothetical protein	[U]	Intracellular trafficking, secretion, and vesicular transport	Snf7	Vacuolar protein sorting-associated protein 60.2 OS=Arabidopsis thaliana OX=3702 GN=VPS60-2 PE=2 SV=1	U	Intracellular trafficking, secretion, and vesicular transport	hypothetical protein LY90DRAFT_415426 [Neocallimastix californiae]
c1033320.graph_c1	[J]	Translation, ribosomal structure and biogenesis	Cellular Component: ribosome (GO:0005840);;	K02865|1.3111e-49|cic:CICLE_v10030134mg|K02865 large subunit ribosomal protein L10Ae | (RefSeq) hypothetical protein	[J]	Translation, ribosomal structure and biogenesis	Ribosomal protein L1p/L10e family	60S ribosomal protein L10a OS=Oryza sativa subsp. japonica OX=39947 GN=RPL10A PE=1 SV=1	J	Translation, ribosomal structure and biogenesis	60S ribosomal protein L10a-3 [Citrus clementina]
c1033322.graph_c0	--	--	Molecular Function: protein serine/threonine kinase activity (GO:0004674);; Molecular Function: ATP binding (GO:0005524);; Biological Process: protein phosphorylation (GO:0006468);; Cellular Component: integral component of membrane (GO:0016021);;	--	--	--	--	Probable LRR receptor-like serine/threonine-protein kinase At1g06840 OS=Arabidopsis thaliana OX=3702 GN=At1g06840 PE=2 SV=2	T	Signal transduction mechanisms	PREDICTED: probable LRR receptor-like serine/threonine-protein kinase At1g06840 isoform X1 [Lupinus angustifolius]
c1033324.graph_c0	[O]	Posttranslational modification, protein turnover, chaperones	Molecular Function: binding (GO:0005488);; Cellular Component: cytoplasm (GO:0005737);; Molecular Function: ubiquitin-like protein transferase activity (GO:0019787);;	K10579|4.74613e-45|ccp:CHC_T00009159001|K10579 ubiquitin-conjugating enzyme E2 M | (RefSeq) ubiquitin-conjugating enzyme E2M	[O]	Posttranslational modification, protein turnover, chaperones	Ubiquitin-conjugating enzyme	NEDD8-conjugating enzyme Ubc12 OS=Arabidopsis thaliana OX=3702 GN=RCE1 PE=1 SV=1	O	Posttranslational modification, protein turnover, chaperones	ubiquitin conjugating enzyme 12 [Ciliophrys infusionum]
c1033339.graph_c0	[C]	Energy production and conversion	Cellular Component: mitochondrial respiratory chain complex I (GO:0005747);; Biological Process: mitochondrial electron transport, NADH to ubiquinone (GO:0006120);; Molecular Function: NADH dehydrogenase (ubiquinone) activity (GO:0008137);; Cellular Component: plasma membrane respiratory chain complex I (GO:0045272);; Molecular Function: iron-sulfur cluster binding (GO:0051536);;	K03943|9.9467e-70|csl:COCSUDRAFT_18421|K03943 NADH dehydrogenase (ubiquinone) flavoprotein 2 [EC:1.6.5.3 1.6.99.3] | (RefSeq) hypothetical protein	[C]	Energy production and conversion	Thioredoxin-like [2Fe-2S] ferredoxin	NADH dehydrogenase [ubiquinone] flavoprotein 2, mitochondrial OS=Arabidopsis thaliana OX=3702 GN=At4g02580 PE=1 SV=3	C	Energy production and conversion	hypothetical protein K493DRAFT_327627 [Basidiobolus meristosporus CBS 931.73]
c1033347.graph_c0	[R]	General function prediction only	Molecular Function: nucleotide binding (GO:0000166);; Cellular Component: endoplasmic reticulum (GO:0005783);; Biological Process: ER to Golgi vesicle-mediated transport (GO:0006888);; Biological Process: protein transport (GO:0015031);; Biological Process: vesicle organization (GO:0016050);; Cellular Component: intracellular organelle part (GO:0044446);; Biological Process: single-organism cellu…	K07953|2.10436e-66|smo:SELMODRAFT_165998|K07953 GTP-binding protein SAR1 [EC:3.6.5.-] | (RefSeq) Sar1b-1; Sar1, ras family GTPase	[U]	Intracellular trafficking, secretion, and vesicular transport	ADP-ribosylation factor family;; Ras family;; 50S ribosome-binding GTPase;; Ras of Complex, Roc, domain of DAPkinase;; Signal recognition particle receptor beta subunit;; Elongation factor Tu GTP binding domain;; Gtr1/RagA G protein conserved region	GTP-binding protein SAR1A OS=Arabidopsis thaliana OX=3702 GN=SAR1A PE=2 SV=1	U	Intracellular trafficking, secretion, and vesicular transport	Sar1, ras family GTPase [Selaginella moellendorffii]
c1033382.graph_c0	[R]	General function prediction only	Cellular Component: endomembrane system (GO:0012505);; Cellular Component: membrane (GO:0016020);; Biological Process: vesicle-mediated transport (GO:0016192);; Cellular Component: intracellular membrane-bounded organelle (GO:0043231);; Cellular Component: cytoplasmic part (GO:0044444);; Cellular Component: intracellular organelle part (GO:0044446);;	K07874|9.12373e-38|cme:CYME_CMF181C|K07874 Ras-related protein Rab-1A | (RefSeq) small GTP-binding protein of Rab family	[TU]	--	Ras family;; Ras of Complex, Roc, domain of DAPkinase;; ADP-ribosylation factor family;; Elongation factor Tu GTP binding domain;; Gtr1/RagA G protein conserved region	Ras-like GTP-binding protein YPT1 OS=Phytophthora infestans OX=4787 GN=YPT1 PE=3 SV=1	S	Function unknown	hypothetical protein AURANDRAFT_38219 [Aureococcus anophagefferens]
c1033410.graph_c0	--	--	--	K20131|6.51992e-21|obr:102704138|K20131 Rab5 GDP/GTP exchange factor | (RefSeq) vacuolar protein sorting-associated protein 9A-like	[U]	Intracellular trafficking, secretion, and vesicular transport	Vacuolar sorting protein 9 (VPS9) domain	Vacuolar protein sorting-associated protein 9A OS=Arabidopsis thaliana OX=3702 GN=VPS9A PE=1 SV=1	S	Function unknown	PREDICTED: vacuolar protein sorting-associated protein 9A-like isoform X2 [Oryza brachyantha]
c1033417.graph_c2	[O]	Posttranslational modification, protein turnover, chaperones	Molecular Function: ATP binding (GO:0005524);; Biological Process: response to stress (GO:0006950);; Cellular Component: membrane (GO:0016020);; Cellular Component: intracellular membrane-bounded organelle (GO:0043231);; Cellular Component: cytoplasmic part (GO:0044444);; Biological Process: single-organism process (GO:0044699);; Molecular Function: unfolded protein binding (GO:0051082);;	K09487|2.84917e-172|bdi:100823353|K09487 heat shock protein 90kDa beta | (RefSeq) endoplasmin homolog	[O]	Posttranslational modification, protein turnover, chaperones	Hsp90 protein;; Histidine kinase-, DNA gyrase B-, and HSP90-like ATPase;; Histidine kinase-, DNA gyrase B-, and HSP90-like ATPase	Endoplasmin homolog OS=Hordeum vulgare OX=4513 PE=2 SV=1	O	Posttranslational modification, protein turnover, chaperones	heat shock protein Hsp90 [Hesseltinella vesiculosa]
c1033436.graph_c0	[T]	Signal transduction mechanisms	Biological Process: cellular process (GO:0009987);; Molecular Function: oxidoreductase activity (GO:0016491);; Cellular Component: intracellular part (GO:0044424);;	K06072|2.38726e-85|csl:COCSUDRAFT_17554|K06072 deoxyhypusine monooxygenase [EC:1.14.99.29] | (RefSeq) deoxyhypusine hydroxylase	[R]	General function prediction only	HEAT repeats;; PBS lyase HEAT-like repeat;; HEAT repeat	Deoxyhypusine hydroxylase OS=Arabidopsis thaliana OX=3702 GN=At3g58180 PE=1 SV=1	C	Energy production and conversion	ARM repeat-containing protein [Rhizophagus irregularis]
c1033437.graph_c0	--	--	--	K02997|1.97363e-09|mpp:MICPUCDRAFT_49506|K02997 small subunit ribosomal protein S9e | (RefSeq) hypothetical protein	[J]	Translation, ribosomal structure and biogenesis	--	40S ribosomal protein S9-1 OS=Arabidopsis thaliana OX=3702 GN=RPS9B PE=1 SV=1	J	Translation, ribosomal structure and biogenesis	hypothetical protein AURANDRAFT_28757 [Aureococcus anophagefferens]
c1033509.graph_c0	[T]	Signal transduction mechanisms	--	--	[R]	General function prediction only	Ankyrin repeats (3 copies);; Ankyrin repeat;; Ankyrin repeats (many copies);; Ankyrin repeat;; Ankyrin repeats (many copies)	Ankyrin repeat-containing protein ITN1 OS=Arabidopsis thaliana OX=3702 GN=ITN1 PE=1 SV=1	S	Function unknown	hypothetical protein AC579_8342 [Pseudocercospora musae]
c1033539.graph_c0	--	--	--	--	--	--	--	--	S	Function unknown	uncharacterized protein LOC107645611 [Arachis ipaensis]
c1033572.graph_c0	[F]	Nucleotide transport and metabolism	Molecular Function: guanylate kinase activity (GO:0004385);; Biological Process: phosphorylation (GO:0016310);; Biological Process: GMP metabolic process (GO:0046037);; Biological Process: GDP metabolic process (GO:0046710);;	K00942|3.78058e-66|ota:Ot12g01990|K00942 guanylate kinase [EC:2.7.4.8] | (RefSeq) KGUA; Guanylate kinase (IC)	[F]	Nucleotide transport and metabolism	Guanylate kinase	Guanylate kinase 1 OS=Oryza sativa subsp. japonica OX=39947 GN=GK1 PE=2 SV=2	F	Nucleotide transport and metabolism	guanylate kinase [Talaromyces stipitatus ATCC 10500]
c1033594.graph_c0	[M]	Cell wall/membrane/envelope biogenesis	--	--	[S]	Function unknown	Zinc carboxypeptidase	--	E	Amino acid transport and metabolism	Zn-dependent exopeptidase [Rhizoclosmatium globosum]
c1033602.graph_c0	[J]	Translation, ribosomal structure and biogenesis	Cellular Component: intracellular ribonucleoprotein complex (GO:0030529);;	K02941|1.07287e-95|cmo:103497088|K02941 large subunit ribosomal protein LP0 | (RefSeq) 60S acidic ribosomal protein P0-like	[J]	Translation, ribosomal structure and biogenesis	Ribosomal protein L10;; 60s Acidic ribosomal protein	60S acidic ribosomal protein P0-3 OS=Arabidopsis thaliana OX=3702 GN=RPP0C PE=1 SV=1	J	Translation, ribosomal structure and biogenesis	unknown [Lotus japonicus]
c1033612.graph_c0	--	--	--	--	--	--	PLAC8 family	Cell number regulator 10 OS=Zea mays OX=4577 GN=CNR10 PE=2 SV=1	--	--	--
c1033624.graph_c0	[V]	Defense mechanisms	--	K01515|6.68747e-38|csl:COCSUDRAFT_49150|K01515 ADP-ribose pyrophosphatase [EC:3.6.1.13] | (RefSeq) hypothetical protein	[L]	Replication, recombination and repair	NUDIX domain	--	L	Replication, recombination and repair	hypothetical protein RirG_252700 [Rhizophagus irregularis DAOM 197198w]
c1033632.graph_c0	--	--	--	--	--	--	Profilin	--	S	Function unknown	hypothetical protein F751_3079 [Auxenochlorella protothecoides]
c1033653.graph_c0	--	--	Cellular Component: photosystem II (GO:0009523);; Biological Process: photosynthesis (GO:0015979);; Cellular Component: integral component of membrane (GO:0016021);;	--	--	--	Photosystem II reaction centre X protein (PsbX)	--	--	--	expressed protein [Chlorella variabilis]
c1033701.graph_c0	[P]	Inorganic ion transport and metabolism	Molecular Function: oxidoreductase activity (GO:0016491);; Biological Process: single-organism metabolic process (GO:0044710);;	K00327|3.84854e-54|cre:CHLREDRAFT_116375|K00327 NADPH-ferrihemoprotein reductase [EC:1.6.2.4] | (RefSeq) NCR2; NADPH-cytochrome P450 reductase	[C]	Energy production and conversion	FAD binding domain;; Pyruvate flavodoxin/ferredoxin oxidoreductase, thiamine diP-bdg;; Oxidoreductase NAD-binding domain;; Pyruvate:ferredoxin oxidoreductase core domain II	Pyruvate dehydrogenase [NADP(+)], mitochondrial OS=Euglena gracilis OX=3039 GN=PNO PE=1 SV=1	P	Inorganic ion transport and metabolism	hypothetical protein L914_06708 [Phytophthora parasitica]
c1033706.graph_c0	--	--	Cellular Component: plasma membrane (GO:0005886);; Biological Process: establishment or maintenance of cell polarity (GO:0007163);; Biological Process: trichome morphogenesis (GO:0010090);; Cellular Component: SCAR complex (GO:0031209);; Molecular Function: protein complex binding (GO:0032403);; Molecular Function: identical protein binding (GO:0042802);; Biological Process: actin nucleation (GO:…	K05752|2.23366e-14|rcu:8270245|K05752 chromosome 3 open reading frame 10 | (RefSeq) protein BRICK 1	--	--	--	Protein BRICK 1 OS=Arabidopsis thaliana OX=3702 GN=BRK1 PE=1 SV=1	S	Function unknown	hypothetical protein AURANDRAFT_20180 [Aureococcus anophagefferens]
c1033714.graph_c0	[J]	Translation, ribosomal structure and biogenesis	Molecular Function: RNA binding (GO:0003723);; Molecular Function: structural constituent of ribosome (GO:0003735);; Cellular Component: cytosol (GO:0005829);; Biological Process: translation (GO:0006412);; Cellular Component: small ribosomal subunit (GO:0015935);; Biological Process: ribosome biogenesis (GO:0042254);;	K02964|1.04863e-74|fve:101305944|K02964 small subunit ribosomal protein S18e | (RefSeq) 40S ribosomal protein S18-like	[J]	Translation, ribosomal structure and biogenesis	Ribosomal protein S13/S18	40S ribosomal protein S18 OS=Arabidopsis thaliana OX=3702 GN=RPS18A PE=1 SV=1	J	Translation, ribosomal structure and biogenesis	PREDICTED: 40S ribosomal protein S18-like [Fragaria vesca subsp. vesca]
c1033729.graph_c0	[R]	General function prediction only	--	--	--	--	Enoyl-CoA hydratase/isomerase	--	S	Function unknown	--
c1033746.graph_c0	--	--	--	K12197|1.47014e-08|ppp:PHYPADRAFT_227297|K12197 charged multivesicular body protein 1 | (RefSeq) hypothetical protein	--	--	--	--	--	--	predicted protein [Physcomitrella patens]
c1033752.graph_c0	--	--	Biological Process: ribosomal large subunit assembly (GO:0000027);; Molecular Function: structural constituent of ribosome (GO:0003735);; Biological Process: translation (GO:0006412);; Cellular Component: cytosolic large ribosomal subunit (GO:0022625);; Biological Process: assembly of large subunit precursor of preribosome (GO:1902626);;	K02896|1.69989e-23|ccp:CHC_T00010216001|K02896 large subunit ribosomal protein L24e | (RefSeq) ribosomal protein L24	[J]	Translation, ribosomal structure and biogenesis	Ribosomal protein L24e	60S ribosomal protein L24-2 OS=Arabidopsis thaliana OX=3702 GN=RPL24B PE=1 SV=2	J	Translation, ribosomal structure and biogenesis	60S ribosomal protein L24, partial [Karlodinium veneficum]
c1033756.graph_c1	[E]	Amino acid transport and metabolism	Molecular Function: serine-type endopeptidase activity (GO:0004252);; Cellular Component: cytoplasm (GO:0005737);; Biological Process: proteolysis (GO:0006508);;	K01354|6.04439e-144|jcu:105635598|K01354 oligopeptidase B [EC:3.4.21.83] | (RefSeq) prolyl endopeptidase-like	[O]	Posttranslational modification, protein turnover, chaperones	Prolyl oligopeptidase, N-terminal beta-propeller domain;; Prolyl oligopeptidase family	--	E	Amino acid transport and metabolism	hypothetical protein SPPG_02895 [Spizellomyces punctatus DAOM BR117]
c1033782.graph_c1	[T]	Signal transduction mechanisms	--	--	[R]	General function prediction only	Serine aminopeptidase, S33;; alpha/beta hydrolase fold;; Alpha/beta hydrolase of unknown function (DUF1057)	Alpha/beta hydrolase domain-containing protein WAV2 OS=Arabidopsis thaliana OX=3702 GN=WAV2 PE=2 SV=1	S	Function unknown	putative alpha/beta hydrolase [Symbiodinium microadriaticum]
c1033788.graph_c1	[P]	Inorganic ion transport and metabolism	Molecular Function: catalytic activity (GO:0003824);; Molecular Function: ion binding (GO:0043167);;	K00522|1.01775e-27|pper:PRUPE_ppa010086mg|K00522 ferritin heavy chain [EC:1.16.3.2] | (RefSeq) hypothetical protein	[P]	Inorganic ion transport and metabolism	Ferritin-like domain	Ferritin-1, chloroplastic OS=Pisum sativum OX=3888 PE=1 SV=2	P	Inorganic ion transport and metabolism	ferritin [Mitosporidium daphniae]
c1033819.graph_c0	[J]	Translation, ribosomal structure and biogenesis	Biological Process: ribosomal subunit export from nucleus (GO:0000054);; Biological Process: maturation of LSU-rRNA from tricistronic rRNA transcript (SSU-rRNA, 5.8S rRNA, LSU-rRNA) (GO:0000463);; Biological Process: maturation of 5.8S rRNA from tricistronic rRNA transcript (SSU-rRNA, 5.8S rRNA, LSU-rRNA) (GO:0000466);; Molecular Function: translation initiation factor activity (GO:0003743);; Cel…	K03264|2.52449e-126|vcn:VOLCADRAFT_80373|K03264 translation initiation factor 6 | (RefSeq) eif6A; eukaryotic translation initiation factor 6	[J]	Translation, ribosomal structure and biogenesis	eIF-6 family	Eukaryotic translation initiation factor 6-2 OS=Arabidopsis thaliana OX=3702 GN=EIF6-2 PE=2 SV=1	J	Translation, ribosomal structure and biogenesis	eukaryotic translation initiation factor 6 [Spizellomyces punctatus DAOM BR117]
c1033850.graph_c0	[O]	Posttranslational modification, protein turnover, chaperones	Molecular Function: oxidoreductase activity (GO:0016491);;	K07305|1.47143e-32|cme:CYME_CMP201C|K07305 peptide-methionine (R)-S-oxide reductase [EC:1.8.4.12] | (RefSeq) similar to transcriptional regulator	[O]	Posttranslational modification, protein turnover, chaperones	--	Peptide methionine sulfoxide reductase B1, chloroplastic OS=Oryza sativa subsp. japonica OX=39947 GN=MSRB1 PE=2 SV=2	--	--	peptide methionine sulfoxide reductase msrB [Puccinia triticina 1-1 BBBD Race 1]
c1033876.graph_c0	--	--	--	--	--	--	--	--	S	Function unknown	--
c1033890.graph_c0	[R]	General function prediction only	--	--	[Q]	Secondary metabolites biosynthesis, transport and catabolism	short chain dehydrogenase;; Enoyl-(Acyl carrier protein) reductase;; KR domain	11-beta-hydroxysteroid dehydrogenase-like 2 OS=Arabidopsis thaliana OX=3702 GN=HSD2 PE=3 SV=1	S	Function unknown	11-beta-hydroxysteroid dehydrogenase 1B-like [Carica papaya]
c1033897.graph_c0	[O]	Posttranslational modification, protein turnover, chaperones	Molecular Function: transferase activity (GO:0016740);; Biological Process: cellular metabolic process (GO:0044237);; Biological Process: organonitrogen compound metabolic process (GO:1901564);;	K01800|2.41234e-65|sot:102593841|K01800 maleylacetoacetate isomerase [EC:5.2.1.2] | (RefSeq) glutathione S-transferase zeta class-like	[O]	Posttranslational modification, protein turnover, chaperones	Glutathione S-transferase, N-terminal domain;; Glutathione S-transferase, N-terminal domain;; Glutathione S-transferase, N-terminal domain;; Glutathione S-transferase, C-terminal domain;; Glutathione S-transferase, C-terminal domain	Glutathione S-transferase zeta class OS=Euphorbia esula OX=3993 PE=2 SV=1	O	Posttranslational modification, protein turnover, chaperones	maleylacetoacetate isomerase [Pythium insidiosum]
c1033920.graph_c0	--	--	--	--	--	--	Cofilin/tropomyosin-type actin-binding protein	--	S	Function unknown	--
c1033937.graph_c0	--	--	--	--	--	--	--	--	S	Function unknown	PREDICTED: uncharacterized protein LOC101515523 [Cicer arietinum]
c1033959.graph_c0	--	--	--	--	--	--	Domain of unknown function (DUF4282)	--	--	--	--
c1033997.graph_c0	--	--	--	--	[I]	Lipid transport and metabolism	CRAL/TRIO domain;; CRAL/TRIO, N-terminal domain	Phosphatidylinositol/phosphatidylcholine transfer protein SFH12 OS=Arabidopsis thaliana OX=3702 GN=SFH12 PE=2 SV=1	S	Function unknown	PREDICTED: phosphatidylinositol transfer protein PDR17 [Oryza brachyantha]
c1034010.graph_c0	[S]	Function unknown	--	--	--	--	Cysteine-rich secretory protein family	--	S	Function unknown	hypothetical protein AM588_10009588 [Phytophthora nicotianae]
c1034051.graph_c0	--	--	Cellular Component: nuclear chromatin (GO:0000790);; Molecular Function: transcriptional activator activity, RNA polymerase II core promoter proximal region sequence-specific binding (GO:0001077);; Molecular Function: transcriptional repressor activity, RNA polymerase II core promoter proximal region sequence-specific binding (GO:0001078);; Molecular Function: RNA polymerase II activating transcr…	K12412|4.28344e-06|cmo:103497390|K12412 pheromone receptor transcription factor | (RefSeq) agamous-like MADS-box protein AGL62	[K]	Transcription	SRF-type transcription factor (DNA-binding and dimerisation domain)	Agamous-like MADS-box protein AGL21 OS=Arabidopsis thaliana OX=3702 GN=AGL21 PE=1 SV=1	K	Transcription	hypothetical protein BATDEDRAFT_7506 [Batrachochytrium dendrobatidis JAM81]
c1034053.graph_c0	--	--	--	--	--	--	RPEL repeat	--	S	Function unknown	hypothetical protein [Sporisorium scitamineum]
c1034054.graph_c0	--	--	--	--	--	--	Vacuolar protein sorting 55	--	--	--	--
c1034058.graph_c0	--	--	--	--	--	--	--	--	K	Transcription	--
c1034071.graph_c0	[O]	Posttranslational modification, protein turnover, chaperones	Molecular Function: binding (GO:0005488);;	K09500|2.49373e-143|pxb:103967406|K09500 T-complex protein 1 subunit theta | (RefSeq) T-complex protein 1 subunit theta-like	[O]	Posttranslational modification, protein turnover, chaperones	--	T-complex protein 1 subunit theta OS=Arabidopsis thaliana OX=3702 GN=CCT8 PE=1 SV=1	O	Posttranslational modification, protein turnover, chaperones	TCP-1/cpn60 chaperonin family protein [Klebsormidium nitens]
c1034100.graph_c0	--	--	Molecular Function: structural constituent of ribosome (GO:0003735);; Biological Process: translation (GO:0006412);; Molecular Function: hydrolase activity (GO:0016787);; Cellular Component: cytosolic large ribosomal subunit (GO:0022625);;	K02901|7.07904e-37|ppp:PHYPADRAFT_194649|K02901 large subunit ribosomal protein L27e | (RefSeq) hypothetical protein	[J]	Translation, ribosomal structure and biogenesis	Ribosomal L27e protein family;; KOW motif	60S ribosomal protein L27 OS=Pyrobotrys stellata OX=3064 GN=RPL27 PE=2 SV=1	J	Translation, ribosomal structure and biogenesis	60S ribosomal protein L27 [Pythium insidiosum]
c1034119.graph_c0	[J]	Translation, ribosomal structure and biogenesis	Molecular Function: RNA binding (GO:0003723);; Molecular Function: structural constituent of ribosome (GO:0003735);; Biological Process: rRNA export from nucleus (GO:0006407);; Biological Process: translation (GO:0006412);; Cellular Component: small ribosomal subunit (GO:0015935);;	K02958|2.45125e-46|zma:100285366|K02958 small subunit ribosomal protein S15e | (RefSeq) 40S ribosomal protein S15	[J]	Translation, ribosomal structure and biogenesis	Ribosomal protein S19	40S ribosomal protein S15 OS=Picea mariana OX=3335 GN=RPS15 PE=2 SV=1	J	Translation, ribosomal structure and biogenesis	hypothetical protein AURANDRAFT_38929 [Aureococcus anophagefferens]
c1034170.graph_c0	--	--	Biological Process: cytoplasmic translation (GO:0002181);; Cellular Component: nucleus (GO:0005634);; Cellular Component: mitochondrion (GO:0005739);; Cellular Component: cytosol (GO:0005829);; Biological Process: cellular response to oxidative stress (GO:0034599);;	--	[DZ]	--	Translationally controlled tumour protein	Translationally-controlled tumor protein homolog OS=Hordeum vulgare OX=4513 GN=TCTP PE=2 SV=2	S	Function unknown	hypothetical protein PLICRDRAFT_97635 [Plicaturopsis crispa FD-325 SS-3]
c1034183.graph_c0	[J]	Translation, ribosomal structure and biogenesis	Biological Process: cytoplasmic translation (GO:0002181);; Molecular Function: structural constituent of ribosome (GO:0003735);; Cellular Component: cytosolic large ribosomal subunit (GO:0022625);;	K02880|8.12704e-48|cit:102628450|K02880 large subunit ribosomal protein L17e | (RefSeq) 60S ribosomal protein L17-2	[J]	Translation, ribosomal structure and biogenesis	Ribosomal protein L22p/L17e	60S ribosomal protein L17-2 OS=Arabidopsis thaliana OX=3702 GN=RPL17B PE=2 SV=2	J	Translation, ribosomal structure and biogenesis	60S ribosomal protein L17-2 [Pythium insidiosum]
c1034224.graph_c0	[J]	Translation, ribosomal structure and biogenesis	Molecular Function: nucleotide binding (GO:0000166);; Molecular Function: aminoacyl-tRNA ligase activity (GO:0004812);; Biological Process: tRNA aminoacylation for protein translation (GO:0006418);;	K04567|0|vcn:VOLCADRAFT_76143|K04567 lysyl-tRNA synthetase, class II [EC:6.1.1.6] | (RefSeq) hypothetical protein	[J]	Translation, ribosomal structure and biogenesis	tRNA synthetases class II (D, K and N);; OB-fold nucleic acid binding domain;; tRNA synthetases class II core domain (F)	Lysine--tRNA ligase OS=Oryza sativa subsp. japonica OX=39947 GN=Os03g0586800 PE=2 SV=1	J	Translation, ribosomal structure and biogenesis	PREDICTED: lysine--tRNA ligase isoform X2 [Ipomoea nil]
c1034276.graph_c0	--	--	Cellular Component: nucleus (GO:0005634);; Biological Process: translational initiation (GO:0006413);; Cellular Component: protein complex (GO:0043234);; Cellular Component: cytoplasmic part (GO:0044444);;	K03250|5.68122e-121|ppp:PHYPADRAFT_104560|K03250 translation initiation factor 3 subunit E | (RefSeq) hypothetical protein	[J]	Translation, ribosomal structure and biogenesis	eIF3 subunit 6 N terminal domain;; PCI domain	Eukaryotic translation initiation factor 3 subunit E OS=Arabidopsis thaliana OX=3702 GN=TIF3E1 PE=1 SV=1	J	Translation, ribosomal structure and biogenesis	hypothetical protein AXG93_3960s1480 [Marchantia polymorpha subsp. ruderalis]
c1034307.graph_c0	--	--	--	K13989|1.45497e-48|atr:18447987|K13989 Derlin-2/3 | (RefSeq) derlin-2	[S]	Function unknown	Der1-like family;; Rhomboid family	Derlin-2.1 OS=Zea mays OX=4577 GN=DER2.1 PE=2 SV=2	S	Function unknown	derlin-1-like protein [Syncephalastrum racemosum]
c1034324.graph_c0	--	--	Cellular Component: membrane (GO:0016020);; Cellular Component: membrane-bounded organelle (GO:0043227);; Cellular Component: intracellular organelle (GO:0043229);; Cellular Component: cytoplasmic part (GO:0044444);;	--	[T]	Signal transduction mechanisms	Vacuolar protein sorting 55	Vacuolar protein sorting-associated protein 55 homolog OS=Arabidopsis thaliana OX=3702 GN=At1g32410 PE=2 SV=1	U	Intracellular trafficking, secretion, and vesicular transport	vacuolar protein sorting 55 [Xanthophyllomyces dendrorhous]
c1034372.graph_c0	--	--	--	--	--	--	Glucose-repressible protein Grg1	--	--	--	--
c1034378.graph_c0	[O]	Posttranslational modification, protein turnover, chaperones	Cellular Component: endomembrane system (GO:0012505);; Cellular Component: membrane (GO:0016020);; Cellular Component: intracellular membrane-bounded organelle (GO:0043231);; Cellular Component: cytoplasmic part (GO:0044444);; Cellular Component: intracellular organelle part (GO:0044446);;	K16368|1.20137e-09|mis:MICPUN_61148|K16368 diacylglycerol kinase (CTP) [EC:2.7.1.174] | (RefSeq) hypothetical protein	[S]	Function unknown	--	--	I	Lipid transport and metabolism	hypothetical protein K493DRAFT_265765 [Basidiobolus meristosporus CBS 931.73]
c1034402.graph_c0	[I]	Lipid transport and metabolism	--	K04712|1.97582e-36|ccp:CHC_T00009401001|K04712 sphingolipid Delta-4 desaturase [EC:1.14.-.-] | (RefSeq) sphingolipid delta-4 desaturase	[I]	Lipid transport and metabolism	Fatty acid desaturase;; Sphingolipid Delta4-desaturase (DES)	Sphingolipid delta(4)-desaturase DES1-like OS=Oryza sativa subsp. japonica OX=39947 GN=Os02g0639600 PE=2 SV=1	I	Lipid transport and metabolism	sphingolipid delta-4 desaturase [Chondrus crispus]
c1034414.graph_c0	--	--	Molecular Function: binding (GO:0005488);; Biological Process: cellular process (GO:0009987);;	K17808|1.60295e-16|cvr:CHLNCDRAFT_134348|K17808 mitochondrial protein import protein ZIM17 | (RefSeq) hypothetical protein	[S]	Function unknown	DNL zinc finger	--	S	Function unknown	hypothetical protein RO3G_11646 [Rhizopus delemar RA 99-880]
c1034425.graph_c0	[R]	General function prediction only	--	--	--	--	CoA binding domain	--	S	Function unknown	NAD(P)-binding protein, partial [Mortierella elongata AG-77]
c1034444.graph_c0	--	--	Molecular Function: 3',5'-cyclic-nucleotide phosphodiesterase activity (GO:0004114);; Biological Process: signal transduction (GO:0007165);; Cellular Component: integral component of membrane (GO:0016021);;	--	--	--	--	--	--	--	Hypothetical protein PHPALM_11024 [Phytophthora palmivora var. palmivora]
c1034461.graph_c0	--	--	Cellular Component: vacuolar proton-transporting V-type ATPase, V0 domain (GO:0000220);; Biological Process: vacuolar acidification (GO:0007035);; Biological Process: ATP hydrolysis coupled proton transport (GO:0015991);; Cellular Component: integral component of membrane (GO:0016021);; Molecular Function: proton-transporting ATPase activity, rotational mechanism (GO:0046961);;	K03661|2.42487e-64|zma:100285771|K03661 V-type H+-transporting ATPase 21kDa proteolipid subunit | (RefSeq) pco096443, GRMZM5G867882; uncharacterized LOC100285771	[C]	Energy production and conversion	ATP synthase subunit C	V-type proton ATPase subunit c&apos;&apos;1 OS=Arabidopsis thaliana OX=3702 GN=VHA-c&apos;&apos;1 PE=1 SV=1	C	Energy production and conversion	PREDICTED: V-type proton ATPase subunit c&apos;&apos;1 [Nicotiana tomentosiformis]
c1034479.graph_c0	[O]	Posttranslational modification, protein turnover, chaperones	Biological Process: cellular process (GO:0009987);;	K05864|2.1555e-36|gra:105787596|K05864 peptidyl-prolyl isomerase D [EC:5.2.1.8] | (RefSeq) peptidyl-prolyl cis-trans isomerase CYP40-like	[O]	Posttranslational modification, protein turnover, chaperones	Cyclophilin type peptidyl-prolyl cis-trans isomerase/CLD;; Tetratricopeptide repeat;; Tetratricopeptide repeat	Peptidyl-prolyl cis-trans isomerase CYP40 OS=Arabidopsis thaliana OX=3702 GN=CYP40 PE=2 SV=1	O	Posttranslational modification, protein turnover, chaperones	hypothetical protein PHYBLDRAFT_74362 [Phycomyces blakesleeanus NRRL 1555(-)]
c1034502.graph_c0	[O]	Posttranslational modification, protein turnover, chaperones	Molecular Function: ATP binding (GO:0005524);; Cellular Component: mitochondrion (GO:0005739);; Biological Process: protein folding (GO:0006457);; Molecular Function: unfolded protein binding (GO:0051082);;	K03283|1.33515e-128|gsl:Gasu_51530|K03283 heat shock 70kDa protein 1/8 | (RefSeq) molecular chaperone DnaK	[O]	Posttranslational modification, protein turnover, chaperones	NAD-specific glutamate dehydrogenase	Heat shock 70 kDa protein, mitochondrial OS=Phaseolus vulgaris OX=3885 PE=2 SV=1	O	Posttranslational modification, protein turnover, chaperones	putative mitochondrial Hsp70 chaperone [Linderina pennispora]
c1034512.graph_c0	[J]	Translation, ribosomal structure and biogenesis	--	K14407|1.65502e-12|egr:104451957|K14407 cleavage stimulation factor subunit 2 | (RefSeq) cleavage stimulating factor 64	[A]	RNA processing and modification	RNA recognition motif. (a.k.a. RRM, RBD, or RNP domain)	Cleavage stimulating factor 64 OS=Arabidopsis thaliana OX=3702 GN=CSTF64 PE=1 SV=1	S	Function unknown	hypothetical protein SPPG_03919 [Spizellomyces punctatus DAOM BR117]
c1034519.graph_c0	[J]	Translation, ribosomal structure and biogenesis	Biological Process: cleavage involved in rRNA processing (GO:0000469);; Biological Process: maturation of LSU-rRNA (GO:0000470);; Biological Process: translation (GO:0006412);; Cellular Component: cytosolic large ribosomal subunit (GO:0022625);; Biological Process: rRNA pseudouridine synthesis (GO:0031118);; Biological Process: snRNA pseudouridine synthesis (GO:0031120);; Cellular Component: box …	K11129|2.93213e-44|zma:100193012|K11129 H/ACA ribonucleoprotein complex subunit 2 | (RefSeq) pco076082; uncharacterized LOC100193012	[A]	RNA processing and modification	Ribosomal protein L7Ae/L30e/S12e/Gadd45 family	H/ACA ribonucleoprotein complex subunit 2-like protein OS=Arabidopsis thaliana OX=3702 GN=At5g08180 PE=1 SV=1	J	Translation, ribosomal structure and biogenesis	H/ACA ribonucleoprotein complex subunit 2 [Fistulifera solaris]
c1034532.graph_c0	--	--	--	--	[K]	Transcription	Myb/SANT-like DNA-binding domain	Trihelix transcription factor ASIL2 OS=Arabidopsis thaliana OX=3702 GN=ASIL2 PE=1 SV=1	S	Function unknown	PREDICTED: trihelix transcription factor ASIL2 [Ziziphus jujuba]
c1034560.graph_c0	--	--	Cellular Component: nucleosome (GO:0000786);; Molecular Function: DNA binding (GO:0003677);; Cellular Component: nucleus (GO:0005634);; Molecular Function: protein heterodimerization activity (GO:0046982);;	K11252|8.06941e-40|ppp:PHYPADRAFT_209799|K11252 histone H2B | (RefSeq) HTB1506; histone H2B	[B]	Chromatin structure and dynamics	Core histone H2A/H2B/H3/H4;; Histone-like transcription factor (CBF/NF-Y) and archaeal histone	Histone H2B OS=Olisthodiscus luteus OX=83000 PE=1 SV=2	B	Chromatin structure and dynamics	histone-fold-containing protein [Ascoidea rubescens DSM 1968]
c1034632.graph_c0	--	--	--	K01824|2.23877e-07|cvr:CHLNCDRAFT_34496|K01824 cholestenol Delta-isomerase [EC:5.3.3.5] | (RefSeq) hypothetical protein	--	--	Emopamil binding protein	Probable 3-beta-hydroxysteroid-Delta(8),Delta(7)-isomerase OS=Oryza sativa subsp. japonica OX=39947 GN=Os01g0103600 PE=2 SV=1	S	Function unknown	hypothetical protein FisN_22Lu018 [Fistulifera solaris]
c1034651.graph_c0	[O]	Posttranslational modification, protein turnover, chaperones	Biological Process: metabolic process (GO:0008152);; Molecular Function: oxidoreductase activity, acting on a sulfur group of donors, disulfide as acceptor (GO:0016671);;	K07304|4.38082e-80|olu:OSTLU_43507|K07304 peptide-methionine (S)-S-oxide reductase [EC:1.8.4.11] | (RefSeq) hypothetical protein	[O]	Posttranslational modification, protein turnover, chaperones	Peptide methionine sulfoxide reductase	Peptide methionine sulfoxide reductase OS=Fragaria ananassa OX=3747 PE=2 SV=2	O	Posttranslational modification, protein turnover, chaperones	Peptide methionine sulphoxide reductase MsrA [Ostreococcus tauri]
c1034658.graph_c0	--	--	Biological Process: response to light stimulus (GO:0009416);; Cellular Component: chloroplast thylakoid membrane (GO:0009535);; Biological Process: photosynthesis, light harvesting in photosystem I (GO:0009768);; Cellular Component: chloroplast envelope (GO:0009941);; Cellular Component: plastoglobule (GO:0010287);; Cellular Component: integral component of membrane (GO:0016021);; Molecular Funct…	K08911|4.22793e-50|cre:CHLREDRAFT_136294|K08911 light-harvesting complex I chlorophyll a/b binding protein 5 | (RefSeq) LHCA9; light-harvesting protein of photosystem I	--	--	Chlorophyll A-B binding protein	Photosystem I chlorophyll a/b-binding protein 5, chloroplastic OS=Arabidopsis thaliana OX=3702 GN=LHCA5 PE=1 SV=1	S	Function unknown	hypothetical protein GPECTOR_4g710 [Gonium pectorale]
c1034670.graph_c0	--	--	--	--	--	--	Leucine Rich repeat	--	--	--	hypothetical protein GUITHDRAFT_151698 [Guillardia theta CCMP2712]
c1034679.graph_c0	--	--	--	K02947|1.48095e-11|mis:MICPUN_90249|K02947 small subunit ribosomal protein S10e | (RefSeq) hypothetical protein	[J]	Translation, ribosomal structure and biogenesis	Plectin/S10 domain	40S ribosomal protein S10-2 OS=Oryza sativa subsp. japonica OX=39947 GN=RPS10-2 PE=2 SV=1	J	Translation, ribosomal structure and biogenesis	hypothetical protein TRAVEDRAFT_72344 [Trametes versicolor FP-101664 SS1]
c1034696.graph_c0	--	--	--	K05765|1.39777e-32|gra:105797971|K05765 cofilin | (RefSeq) actin-depolymerizing factor-like	[Z]	Cytoskeleton	Cofilin/tropomyosin-type actin-binding protein	Actin-depolymerizing factor 3 OS=Zea mays OX=4577 GN=ADF3 PE=1 SV=1	S	Function unknown	hypothetical protein [Absidia glauca]
c1034703.graph_c0	[R]	General function prediction only	--	--	[R]	General function prediction only	--	--	S	Function unknown	hypothetical protein RMCBS344292_16237 [Rhizopus microsporus]
c1034720.graph_c0	--	--	Cellular Component: barrier septum (GO:0000935);; Molecular Function: calcium ion binding (GO:0005509);; Molecular Function: protein binding (GO:0005515);; Cellular Component: nucleus (GO:0005634);; Cellular Component: cytosol (GO:0005829);; Cellular Component: plasma membrane (GO:0005886);; Biological Process: starch metabolic process (GO:0005982);; Biological Process: response to mechanical sti…	K02183|5.51635e-22|pda:103722965|K02183 calmodulin | (RefSeq) calmodulin-7	[T]	Signal transduction mechanisms	EF hand;; EF-hand domain;; Ca2+ insensitive EF hand	Calmodulin-4 OS=Arabidopsis thaliana OX=3702 GN=CAM4 PE=1 SV=1	DTZ	--	calmodulin [Chara corallina]
c1034721.graph_c0	--	--	--	--	--	--	Frag1/DRAM/Sfk1 family	--	S	Function unknown	predicted protein [Micromonas commoda]
c1034777.graph_c0	--	--	--	--	[S]	Function unknown	Lung seven transmembrane receptor	--	S	Function unknown	hypothetical protein RhiirB3_406795 [Rhizophagus irregularis]
c1034792.graph_c1	[J]	Translation, ribosomal structure and biogenesis	Biological Process: cytoplasmic translation (GO:0002181);; Molecular Function: structural constituent of ribosome (GO:0003735);; Cellular Component: cytosolic large ribosomal subunit (GO:0022625);; Cellular Component: preribosome, large subunit precursor (GO:0030687);; Biological Process: ribosome biogenesis (GO:0042254);; Molecular Function: large ribosomal subunit rRNA binding (GO:0070180);;	K02941|1.53446e-90|csv:101214032|K02941 large subunit ribosomal protein LP0 | (RefSeq) CSP0; 60S acidic ribosomal protein P0	[J]	Translation, ribosomal structure and biogenesis	Ribosomal protein L10;; 60s Acidic ribosomal protein	60S acidic ribosomal protein P0 OS=Glycine max OX=3847 PE=2 SV=1	J	Translation, ribosomal structure and biogenesis	60S acidic ribosomal protein P0 putative [Pythium insidiosum]
c1034805.graph_c0	--	--	--	--	[TUZ]	--	SH3 domain;; Variant SH3 domain;; Variant SH3 domain	--	Z	Cytoskeleton	SH3-domain-containing protein, partial [Rhizophagus irregularis]
c1034816.graph_c1	[J]	Translation, ribosomal structure and biogenesis	Biological Process: cytoplasmic translation (GO:0002181);; Molecular Function: structural constituent of ribosome (GO:0003735);; Cellular Component: integral component of membrane (GO:0016021);; Molecular Function: oxidoreductase activity (GO:0016491);; Cellular Component: cytosolic large ribosomal subunit (GO:0022625);; Biological Process: oxidation-reduction process (GO:0055114);;	K02877|7.07569e-87|smo:SELMODRAFT_270259|K02877 large subunit ribosomal protein L15e | (RefSeq) hypothetical protein	[J]	Translation, ribosomal structure and biogenesis	Ribosomal L15	60S ribosomal protein L15-1 OS=Arabidopsis thaliana OX=3702 GN=RPL15A PE=2 SV=1	J	Translation, ribosomal structure and biogenesis	hypothetical protein SELMODRAFT_270259 [Selaginella moellendorffii]
c1034835.graph_c0	--	--	--	--	--	--	CsbD-like	--	--	--	hypothetical protein J056_000850 [Wallemia ichthyophaga EXF-994]
c1034839.graph_c0	[E]	Amino acid transport and metabolism	Molecular Function: glutamate-ammonia ligase activity (GO:0004356);; Molecular Function: ATP binding (GO:0005524);; Cellular Component: cytoplasm (GO:0005737);; Biological Process: glutamine biosynthetic process (GO:0006542);;	K01915|1.51115e-103|vvi:100246404|K01915 glutamine synthetase [EC:6.3.1.2] | (RefSeq) GS, GS1, GS1-2; glutamine synthetase	[E]	Amino acid transport and metabolism	Glutamine synthetase, catalytic domain	Glutamine synthetase cytosolic isozyme 2 OS=Vitis vinifera OX=29760 GN=GS1-2 PE=2 SV=1	E	Amino acid transport and metabolism	glutamine synthetase [Camellia sinensis]
c1034893.graph_c0	--	--	--	--	--	--	LicD family	--	--	--	--
c1034915.graph_c0	[R]	General function prediction only	Molecular Function: nucleotide binding (GO:0000166);;	K07937|1.03426e-52|pop:POPTR_0001s30850g|K07937 ADP-ribosylation factor 1 | (RefSeq) POPTRDRAFT_175310; hypothetical protein	[U]	Intracellular trafficking, secretion, and vesicular transport	ADP-ribosylation factor family;; Ras of Complex, Roc, domain of DAPkinase;; Ras family;; Signal recognition particle receptor beta subunit;; Gtr1/RagA G protein conserved region;; 50S ribosome-binding GTPase	ADP-ribosylation factor 1 OS=Oryza sativa subsp. japonica OX=39947 GN=Os01g0813400 PE=2 SV=3	S	Function unknown	hypothetical protein POPTR_0001s30850g [Populus trichocarpa]
c1034918.graph_c0	[C]	Energy production and conversion	--	--	--	--	--	--	S	Function unknown	DUF1121-domain-containing protein [Gonapodya prolifera JEL478]
c1034922.graph_c0	[J]	Translation, ribosomal structure and biogenesis	Molecular Function: structural constituent of ribosome (GO:0003735);; Cellular Component: ribosome (GO:0005840);; Biological Process: translation (GO:0006412);; Molecular Function: rRNA binding (GO:0019843);; Molecular Function: metal ion binding (GO:0046872);;	K02922|5.29762e-32|gsl:Gasu_50890|K02922 large subunit ribosomal protein L37e | (RefSeq) 60S ribosomal protein L37e	[J]	Translation, ribosomal structure and biogenesis	Ribosomal protein L37e	60S ribosomal protein L37-2 OS=Arabidopsis thaliana OX=3702 GN=RPL37B PE=3 SV=2	J	Translation, ribosomal structure and biogenesis	60S ribosomal protein L37e [Galdieria sulphuraria]
c1034928.graph_c0	--	--	--	K19882|3.30292e-11|gmx:100786972|K19882 O-palmitoleoyl-L-serine hydrolase [EC:3.1.1.98] | (RefSeq) pectin acetylesterase 6-like	--	--	--	--	S	Function unknown	PREDICTED: pectin acetylesterase 6-like isoform X1 [Lupinus angustifolius]
c1034944.graph_c0	--	--	--	--	--	--	Cytochrome c oxidase subunit VIIc	--	--	--	--
c1034972.graph_c0	[J]	Translation, ribosomal structure and biogenesis	Molecular Function: structural constituent of ribosome (GO:0003735);; Biological Process: translation (GO:0006412);; Cellular Component: large ribosomal subunit (GO:0015934);;	K02872|2.72061e-80|pxb:103942613|K02872 large subunit ribosomal protein L13Ae | (RefSeq) 60S ribosomal protein L13a-like	[J]	Translation, ribosomal structure and biogenesis	Ribosomal protein L13	60S ribosomal protein L13a OS=Cyanophora paradoxa OX=2762 PE=2 SV=1	J	Translation, ribosomal structure and biogenesis	60S ribosomal protein L13a [Rozella allomycis CSF55]
c1035054.graph_c0	[T]	Signal transduction mechanisms	Biological Process: protein transport (GO:0015031);; Cellular Component: membrane coat (GO:0030117);; Cellular Component: Golgi apparatus part (GO:0044431);; Biological Process: intracellular transport (GO:0046907);; Biological Process: Golgi vesicle transport (GO:0048193);; Cellular Component: bounding membrane of organelle (GO:0098588);;	K05236|0|ppp:PHYPADRAFT_213150|K05236 coatomer subunit alpha | (RefSeq) hypothetical protein	[U]	Intracellular trafficking, secretion, and vesicular transport	Coatomer (COPI) alpha subunit C-terminus;; Coatomer WD associated region;; WD domain, G-beta repeat;; Anaphase-promoting complex subunit 4 WD40 domain	Coatomer subunit alpha-1 OS=Arabidopsis thaliana OX=3702 GN=At1g62020 PE=2 SV=2	S	Function unknown	predicted protein [Physcomitrella patens]
c1035276.graph_c0	--	--	--	--	--	--	--	--	--	--	PREDICTED: probable magnesium transporter NIPA7 isoform X2 [Malus domestica]
c1035296.graph_c0	--	--	Molecular Function: nucleotide binding (GO:0000166);;	K06027|1.62966e-25|nnu:104608226|K06027 vesicle-fusing ATPase [EC:3.6.4.6] | (RefSeq) vesicle-fusing ATPase-like	--	--	--	Vesicle-fusing ATPase OS=Arabidopsis thaliana OX=3702 GN=NSF PE=2 SV=2	O	Posttranslational modification, protein turnover, chaperones	PREDICTED: vesicle-fusing ATPase-like [Lupinus angustifolius]
c1035320.graph_c0	--	--	--	--	--	--	NADH-ubiquinone reductase complex 1 MLRQ subunit	--	--	--	--
c1035357.graph_c0	--	--	--	--	[Q]	Secondary metabolites biosynthesis, transport and catabolism	ABC-2 type transporter	ABC transporter G family member 7 OS=Arabidopsis thaliana OX=3702 GN=ABCG7 PE=2 SV=1	V	Defense mechanisms	hypothetical protein GPECTOR_1g597 [Gonium pectorale]
c1035374.graph_c0	--	--	Cellular Component: integral component of membrane (GO:0016021);;	K20478|4.49413e-42|gmx:100818992|K20478 golgin subfamily B member 1 | (RefSeq) golgin subfamily A member 4-like	--	--	--	--	S	Function unknown	PREDICTED: golgin subfamily A member 4-like isoform X4 [Glycine max]
c1035381.graph_c0	[IQR]	--	--	--	[R]	General function prediction only	short chain dehydrogenase;; Enoyl-(Acyl carrier protein) reductase;; KR domain	Chlorophyll(ide) b reductase NOL, chloroplastic OS=Oryza sativa subsp. japonica OX=39947 GN=NOL PE=1 SV=1	S	Function unknown	NAD(P)-binding protein [Basidiobolus meristosporus CBS 931.73]
c1035402.graph_c0	[J]	Translation, ribosomal structure and biogenesis	Molecular Function: structural constituent of ribosome (GO:0003735);; Cellular Component: ribosome (GO:0005840);; Biological Process: translation (GO:0006412);; Molecular Function: rRNA binding (GO:0019843);; Molecular Function: metal ion binding (GO:0046872);;	--	[J]	Translation, ribosomal structure and biogenesis	Ribosomal protein L37e	60S ribosomal protein L37-2 OS=Arabidopsis thaliana OX=3702 GN=RPL37B PE=3 SV=2	J	Translation, ribosomal structure and biogenesis	60S ribosomal protein L37 [Zea mays]
c1035455.graph_c0	--	--	Cellular Component: chromosome, telomeric region (GO:0000781);; Cellular Component: nucleus (GO:0005634);; Cellular Component: cytosol (GO:0005829);; Biological Process: DNA replication-dependent nucleosome assembly (GO:0006335);; Biological Process: DNA replication-independent nucleosome assembly (GO:0006336);; Biological Process: nucleosome disassembly (GO:0006337);; Biological Process: chromat…	K10753|3.17596e-66|atr:18433808|K10753 histone chaperone ASF1 | (RefSeq) probable histone chaperone ASF1A	[KB]	--	ASF1 like histone chaperone	Probable histone chaperone ASF1A OS=Arabidopsis thaliana OX=3702 GN=ASF1A PE=1 SV=1	BK	--	histone chaperone ASF1 [Mortierella verticillata NRRL 6337]
c1035489.graph_c0	--	--	--	K00799|1.56299e-12|csl:COCSUDRAFT_52804|K00799 glutathione S-transferase [EC:2.5.1.18] | (RefSeq) glutathione S-transferase	--	--	MAPEG family	--	O	Posttranslational modification, protein turnover, chaperones	Hypothetical protein PINS_007636 [Pythium insidiosum]
c1035490.graph_c0	--	--	--	--	--	--	Domain of unknown function (DUF4730)	--	--	--	--
c1035491.graph_c0	--	--	--	--	[O]	Posttranslational modification, protein turnover, chaperones	Sec61beta family	--	U	Intracellular trafficking, secretion, and vesicular transport	--
c1035518.graph_c0	[G]	Carbohydrate transport and metabolism	Molecular Function: hydrolase activity (GO:0016787);;	K01179|4.65651e-75|ccp:CHC_T00008851001|K01179 endoglucanase [EC:3.2.1.4] | (RefSeq) endoglucanase putative cellulase family GH5	--	--	Cellulase (glycosyl hydrolase family 5)	--	G	Carbohydrate transport and metabolism	Endoglucanase [Phytophthora megakarya]
c1035570.graph_c1	[O]	Posttranslational modification, protein turnover, chaperones	Molecular Function: ATP binding (GO:0005524);; Biological Process: nucleotide-excision repair (GO:0006289);; Molecular Function: peptidase activity (GO:0008233);; Cellular Component: proteasome regulatory particle, base subcomplex (GO:0008540);; Molecular Function: microtubule-severing ATPase activity (GO:0008568);; Molecular Function: TBP-class protein binding (GO:0017025);; Molecular Function: …	K03064|1.17185e-86|cre:CHLREDRAFT_24096|K03064 26S proteasome regulatory subunit T4 | (RefSeq) RPT4; 26S proteasome regulatory subunit	[O]	Posttranslational modification, protein turnover, chaperones	--	26S proteasome regulatory subunit S10B homolog B OS=Arabidopsis thaliana OX=3702 GN=RPT4B PE=1 SV=1	O	Posttranslational modification, protein turnover, chaperones	hypothetical protein CEUSTIGMA_g6907.t1 [Chlamydomonas eustigma]
c1035609.graph_c0	--	--	--	--	--	--	Conidiation protein 6	--	--	--	hypothetical protein RSOLAG1IB_02592 [Rhizoctonia solani AG-1 IB]
c1035694.graph_c0	[J]	Translation, ribosomal structure and biogenesis	Molecular Function: structural constituent of ribosome (GO:0003735);; Biological Process: translation (GO:0006412);; Cellular Component: cytosolic small ribosomal subunit (GO:0022627);;	K02984|3.13951e-54|egu:105057951|K02984 small subunit ribosomal protein S3Ae | (RefSeq) 40S ribosomal protein S3a	[J]	Translation, ribosomal structure and biogenesis	Ribosomal S3Ae family	40S ribosomal protein S3a OS=Brassica campestris OX=3711 GN=RPS3A PE=2 SV=2	J	Translation, ribosomal structure and biogenesis	hypothetical protein PHYSODRAFT_285013 [Phytophthora sojae]
c1035737.graph_c0	[J]	Translation, ribosomal structure and biogenesis	Biological Process: ribosomal large subunit assembly (GO:0000027);; Molecular Function: structural constituent of ribosome (GO:0003735);; Biological Process: translation (GO:0006412);; Cellular Component: cytosolic large ribosomal subunit (GO:0022625);;	K02925|1.75467e-42|ccp:CHC_T00007885001|K02925 large subunit ribosomal protein L3e | (RefSeq) hypothetical protein	[J]	Translation, ribosomal structure and biogenesis	Ribosomal protein L3	60S ribosomal protein L3 OS=Oryza sativa subsp. japonica OX=39947 GN=RPL3 PE=2 SV=2	J	Translation, ribosomal structure and biogenesis	putative Transcriptional corepressor Cyc8 [Taphrina deformans PYCC 5710]
c1035766.graph_c0	--	--	Biological Process: cellular process (GO:0009987);; Biological Process: protein transport (GO:0015031);; Cellular Component: cell part (GO:0044464);;	K12183|9.36154e-24|pper:PRUPE_ppa006263mg|K12183 ESCRT-I complex subunit TSG101 | (RefSeq) hypothetical protein	[OU]	--	UEV domain;; Vps23 core domain	Protein ELC-like OS=Arabidopsis thaliana OX=3702 GN=ELCL PE=1 SV=1	U	Intracellular trafficking, secretion, and vesicular transport	hypothetical protein RMCBS344292_09248 [Rhizopus microsporus]
c1035774.graph_c0	--	--	--	--	[R]	General function prediction only	HIT zinc finger	--	S	Function unknown	hypothetical protein K493DRAFT_333642 [Basidiobolus meristosporus CBS 931.73]
c1035791.graph_c0	[J]	Translation, ribosomal structure and biogenesis	Molecular Function: RNA binding (GO:0003723);; Biological Process: translational initiation (GO:0006413);; Cellular Component: intracellular ribonucleoprotein complex (GO:0030529);; Cellular Component: intracellular organelle (GO:0043229);; Cellular Component: protein complex (GO:0043234);; Cellular Component: cytoplasmic part (GO:0044444);;	K03237|6.2298e-77|gsl:Gasu_54400|K03237 translation initiation factor 2 subunit 1 | (RefSeq) translation initiation factor eIF-2 alpha subunit	[J]	Translation, ribosomal structure and biogenesis	Eukaryotic translation initiation factor 2 alpha subunit;; S1 RNA binding domain	Eukaryotic translation initiation factor 2 subunit alpha homolog OS=Arabidopsis thaliana OX=3702 GN=At2g40290 PE=1 SV=2	J	Translation, ribosomal structure and biogenesis	translation initiation factor eIF-2 alpha subunit [Galdieria sulphuraria]
c1035827.graph_c0	--	--	Molecular Function: protein dimerization activity (GO:0046983);;	--	--	--	--	Transcription factor bHLH62 OS=Arabidopsis thaliana OX=3702 GN=BHLH62 PE=2 SV=1	K	Transcription	hypothetical protein PHAVU_008G133600g [Phaseolus vulgaris]
c1035836.graph_c0	[R]	General function prediction only	--	--	--	--	Pirin;; Pirin C-terminal cupin domain	Pirin-like protein OS=Solanum lycopersicum OX=4081 PE=2 SV=1	S	Function unknown	hypothetical protein H310_07293 [Aphanomyces invadans]
c1035856.graph_c1	--	--	--	--	[R]	General function prediction only	SET domain	--	S	Function unknown	hypothetical protein TRIATDRAFT_80097 [Trichoderma atroviride IMI 206040]
c1035875.graph_c0	--	--	Biological Process: spliceosomal complex assembly (GO:0000245);; Cellular Component: U2 snRNP (GO:0005686);; Cellular Component: cytosol (GO:0005829);;	K12832|3.10049e-34|mis:MICPUN_79721|K12832 splicing factor 3B subunit 5 | (RefSeq) hypothetical protein	[S]	Function unknown	Splicing factor 3B subunit 10 (SF3b10)	Uncharacterized protein At3g23325 OS=Arabidopsis thaliana OX=3702 GN=At3g23325 PE=3 SV=1	A	RNA processing and modification	splicing factor 3B subunit 5/RDS3 complex subunit 10 [Piromyces finnis]
c1036004.graph_c0	[O]	Posttranslational modification, protein turnover, chaperones	--	--	--	--	Thioredoxin;; F plasmid transfer operon protein	Thioredoxin Y2, chloroplastic OS=Arabidopsis thaliana OX=3702 GN=At1g43560 PE=2 SV=1	--	--	trx1p [Brettanomyces bruxellensis AWRI1499]
c1036065.graph_c0	--	--	Cellular Component: membrane part (GO:0044425);; Cellular Component: cell part (GO:0044464);;	--	--	--	NADH-ubiquinone oxidoreductase B15 subunit (NDUFB4)	--	S	Function unknown	PREDICTED: uncharacterized protein LOC100258994 [Vitis vinifera]
c1036077.graph_c1	[E]	Amino acid transport and metabolism	Molecular Function: pyridoxal phosphate binding (GO:0030170);; Molecular Function: cysteine desulfurase activity (GO:0031071);; Biological Process: [2Fe-2S] cluster assembly (GO:0044571);;	K04487|1.00148e-51|smo:SELMODRAFT_105841|K04487 cysteine desulfurase [EC:2.8.1.7] | (RefSeq) hypothetical protein	[E]	Amino acid transport and metabolism	Aminotransferase class-V	Cysteine desulfurase, mitochondrial OS=Arabidopsis thaliana OX=3702 GN=NIFS1 PE=1 SV=1	E	Amino acid transport and metabolism	cysteine desulfurase IscS [Pythium insidiosum]
c1036093.graph_c0	--	--	--	--	--	--	WRKY DNA -binding domain	Probable WRKY transcription factor 53 OS=Arabidopsis thaliana OX=3702 GN=WRKY53 PE=1 SV=1	K	Transcription	PREDICTED: probable WRKY transcription factor 41 [Nelumbo nucifera]
c1036106.graph_c0	--	--	--	--	[S]	Function unknown	PPPDE putative peptidase domain	DeSI-like protein At4g17486 OS=Arabidopsis thaliana OX=3702 GN=At4g17486 PE=2 SV=1	S	Function unknown	hypothetical protein MVEG_09576 [Mortierella verticillata NRRL 6337]
c1036140.graph_c0	[O]	Posttranslational modification, protein turnover, chaperones	--	K06689|1.60256e-51|obr:102701102|K06689 ubiquitin-conjugating enzyme E2 D [EC:2.3.2.23] | (RefSeq) ubiquitin-conjugating enzyme E2-17 kDa-like	[O]	Posttranslational modification, protein turnover, chaperones	Ubiquitin-conjugating enzyme;; RWD domain	Ubiquitin-conjugating enzyme E2 30 OS=Arabidopsis thaliana OX=3702 GN=UBC30 PE=1 SV=1	O	Posttranslational modification, protein turnover, chaperones	hypothetical protein CEUSTIGMA_g7708.t1 [Chlamydomonas eustigma]
c1036144.graph_c0	[J]	Translation, ribosomal structure and biogenesis	--	K02966|2.57763e-43|cme:CYME_CMR148C|K02966 small subunit ribosomal protein S19e | (RefSeq) 40S ribosomal protein S19	[J]	Translation, ribosomal structure and biogenesis	Ribosomal protein S19e	40S ribosomal protein S19 OS=Oryza sativa subsp. japonica OX=39947 GN=RPS19A PE=2 SV=1	J	Translation, ribosomal structure and biogenesis	40S ribosomal protein S19 [Zancudomyces culisetae]
c1036181.graph_c0	[O]	Posttranslational modification, protein turnover, chaperones	Molecular Function: peptidyl-prolyl cis-trans isomerase activity (GO:0003755);; Molecular Function: FK506 binding (GO:0005528);; Cellular Component: endoplasmic reticulum membrane (GO:0005789);; Biological Process: homoserine metabolic process (GO:0009092);; Biological Process: chaperone-mediated protein folding (GO:0061077);;	K09568|1.05102e-39|csl:COCSUDRAFT_32393|K09568 FK506-binding protein 1 [EC:5.2.1.8] | (RefSeq) FKBP-type peptidyl-prolyl cis-trans isomerase	[O]	Posttranslational modification, protein turnover, chaperones	--	Peptidyl-prolyl cis-trans isomerase FKBP62 OS=Arabidopsis thaliana OX=3702 GN=FKBP62 PE=1 SV=2	O	Posttranslational modification, protein turnover, chaperones	hypothetical protein CEUSTIGMA_g6468.t1 [Chlamydomonas eustigma]
c1036190.graph_c0	--	--	Biological Process: metabolic process (GO:0008152);; Molecular Function: N-methyltransferase activity (GO:0008170);;	K00550|1.92027e-30|gsl:Gasu_14870|K00550 methylene-fatty-acyl-phospholipid synthase [EC:2.1.1.16] | (RefSeq) methylene-fatty-acyl-phospholipid synthase	[I]	Lipid transport and metabolism	Phospholipid methyltransferase	--	I	Lipid transport and metabolism	hypothetical protein AMAG_16446 [Allomyces macrogynus ATCC 38327]
c1036196.graph_c1	[J]	Translation, ribosomal structure and biogenesis	Biological Process: maturation of SSU-rRNA from tricistronic rRNA transcript (SSU-rRNA, 5.8S rRNA, LSU-rRNA) (GO:0000462);; Molecular Function: structural constituent of ribosome (GO:0003735);; Biological Process: translation (GO:0006412);; Cellular Component: cytosolic small ribosomal subunit (GO:0022627);; Molecular Function: small ribosomal subunit rRNA binding (GO:0070181);;	K02953|4.52618e-40|aly:ARALYDRAFT_907607|K02953 small subunit ribosomal protein S13e | (RefSeq) 40S ribosomal protein S13	[J]	Translation, ribosomal structure and biogenesis	Ribosomal S13/S15 N-terminal domain	40S ribosomal protein S13-1 OS=Arabidopsis thaliana OX=3702 GN=RPS13A PE=2 SV=1	J	Translation, ribosomal structure and biogenesis	40S ribosomal protein S13 [Pneumocystis carinii B80]
c1036219.graph_c1	[T]	Signal transduction mechanisms	Molecular Function: transferase activity (GO:0016740);;	--	[T]	Signal transduction mechanisms	--	CBL-interacting protein kinase 11 OS=Oryza sativa subsp. japonica OX=39947 GN=CIPK11 PE=2 SV=1	T	Signal transduction mechanisms	Serine/threonine protein kinase [Ectocarpus siliculosus]
c1036221.graph_c0	--	--	--	--	--	--	F-box domain	--	--	--	--
c1036230.graph_c0	--	--	--	K11279|3.2436e-31|sita:101767418|K11279 nucleosome assembly protein 1-like 1 | (RefSeq) nucleosome assembly protein 1;2	[BD]	--	Nucleosome assembly protein (NAP)	Nucleosome assembly protein 1;2 OS=Oryza sativa subsp. japonica OX=39947 GN=NAP1;2 PE=2 SV=1	Z	Cytoskeleton	hypothetical protein PAAG_12620 [Paracoccidioides lutzii Pb01]
c1036233.graph_c0	[G]	Carbohydrate transport and metabolism	Cellular Component: cytoplasm (GO:0005737);; Molecular Function: lyase activity (GO:0016829);; Molecular Function: metal ion binding (GO:0046872);;	K01689|4.65799e-130|ppp:PHYPADRAFT_111190|K01689 enolase [EC:4.2.1.11] | (RefSeq) hypothetical protein	[G]	Carbohydrate transport and metabolism	Enolase, C-terminal TIM barrel domain	Enolase OS=Oryza sativa subsp. japonica OX=39947 GN=ENO1 PE=1 SV=2	G	Carbohydrate transport and metabolism	enolase [Chenopodium quinoa]
c1036233.graph_c1	[G]	Carbohydrate transport and metabolism	Cellular Component: phosphopyruvate hydratase complex (GO:0000015);; Molecular Function: magnesium ion binding (GO:0000287);; Molecular Function: phosphopyruvate hydratase activity (GO:0004634);; Biological Process: glycolytic process (GO:0006096);;	K01689|6.58857e-74|ccp:CHC_T00009127001|K01689 enolase [EC:4.2.1.11] | (RefSeq) enolase	[G]	Carbohydrate transport and metabolism	Enolase, C-terminal TIM barrel domain	Enolase OS=Mesembryanthemum crystallinum OX=3544 GN=PGH1 PE=2 SV=1	G	Carbohydrate transport and metabolism	enolase [Chondrus crispus]
c1036278.graph_c0	--	--	--	--	--	--	--	--	--	--	hypothetical protein M569_00258, partial [Genlisea aurea]
c1036280.graph_c0	--	--	--	--	--	--	--	--	D	Cell cycle control, cell division, chromosome partitioning	hypothetical protein AM587_10000138 [Phytophthora nicotianae]
c1036331.graph_c0	--	--	Molecular Function: hydrolase activity, hydrolyzing O-glycosyl compounds (GO:0004553);; Cellular Component: extracellular region (GO:0005576);; Molecular Function: lyase activity (GO:0016829);; Biological Process: cellulose catabolic process (GO:0030245);; Molecular Function: cellulose binding (GO:0030248);;	--	--	--	Glycosyl hydrolase family 7	--	G	Carbohydrate transport and metabolism	hypothetical protein BN14_04100 [Rhizoctonia solani AG-1 IB]
c1036338.graph_c0	--	--	Molecular Function: protein transporter activity (GO:0008565);; Cellular Component: mitochondrial intermembrane space protein transporter complex (GO:0042719);; Biological Process: protein import into mitochondrial inner membrane (GO:0045039);; Molecular Function: metal ion binding (GO:0046872);; Molecular Function: unfolded protein binding (GO:0051082);;	K17778|6.58589e-17|gsl:Gasu_31740|K17778 mitochondrial import inner membrane translocase subunit TIM10 | (RefSeq) mitochondrial protein translocase, MPT family	[U]	Intracellular trafficking, secretion, and vesicular transport	Tim10/DDP family zinc finger	Mitochondrial import inner membrane translocase subunit TIM10 OS=Arabidopsis thaliana OX=3702 GN=TIM10 PE=1 SV=1	O	Posttranslational modification, protein turnover, chaperones	import inner membrane translocase subunit Tim10 [Rhizoctonia solani AG-3 Rhs1AP]
c1036395.graph_c0	[E]	Amino acid transport and metabolism	Molecular Function: spermidine synthase activity (GO:0004766);; Cellular Component: nucleus (GO:0005634);; Cellular Component: cytoplasm (GO:0005737);; Biological Process: spermidine biosynthetic process (GO:0008295);; Biological Process: pantothenate biosynthetic process (GO:0015940);;	K00797|3.26468e-72|ccp:CHC_T00009140001|K00797 spermidine synthase [EC:2.5.1.16] | (RefSeq) putrescine aminopropyltransferase (spermidine synthase)	[E]	Amino acid transport and metabolism	Spermine/spermidine synthase domain;; Spermidine synthase tetramerisation domain	Spermidine synthase 1 OS=Pisum sativum OX=3888 GN=SPDSYN1 PE=2 SV=1	E	Amino acid transport and metabolism	putrescine aminopropyltransferase (spermidine synthase) [Chondrus crispus]
c1036466.graph_c1	--	--	--	--	--	--	--	--	S	Function unknown	hypothetical protein M427DRAFT_280755 [Gonapodya prolifera JEL478]
c1036467.graph_c0	--	--	--	K03626|9.68345e-45|sbi:SORBI_07g026160|K03626 nascent polypeptide-associated complex subunit alpha | (RefSeq) SORBIDRAFT_07g026160, Sb07g026160; hypothetical protein	[K]	Transcription	NAC domain	Nascent polypeptide-associated complex subunit alpha-like protein 2 OS=Arabidopsis thaliana OX=3702 GN=At3g49470 PE=2 SV=2	K	Transcription	NAC transcription factor 1 [Salvia miltiorrhiza]
c1036475.graph_c0	--	--	--	--	--	--	--	--	S	Function unknown	PREDICTED: uncharacterized protein LOC18600944 [Theobroma cacao]
c1036564.graph_c0	--	--	Molecular Function: transcription factor activity, sequence-specific DNA binding (GO:0003700);; Biological Process: regulation of transcription, DNA-templated (GO:0006355);; Molecular Function: sequence-specific DNA binding (GO:0043565);;	K14431|1.15802e-15|gmx:100775882|K14431 transcription factor TGA | (RefSeq) transcription factor TGA7-like	--	--	--	Transcription factor TGA3 OS=Arabidopsis thaliana OX=3702 GN=TGA3 PE=1 SV=1	--	--	Transcription factor TGA7 [Glycine soja]
c1036628.graph_c0	[O]	Posttranslational modification, protein turnover, chaperones	--	K12158|2.0334e-16|csl:COCSUDRAFT_27160|K12158 ubiquitin-like protein Nedd8 | (RefSeq) ubiquitin	[DO]	--	Ubiquitin family;; Ubiquitin-2 like Rad60 SUMO-like;; Ubiquitin-2 like Rad60 SUMO-like	Ubiquitin-NEDD8-like protein RUB1 OS=Deschampsia antarctica OX=159298 GN=RUB1 PE=2 SV=2	O	Posttranslational modification, protein turnover, chaperones	ubiquitin B [Saprolegnia diclina VS20]
c1036655.graph_c0	[G]	Carbohydrate transport and metabolism	Molecular Function: monooxygenase activity (GO:0004497);; Cellular Component: chloroplast (GO:0009507);; Biological Process: photorespiration (GO:0009853);; Molecular Function: ribulose-bisphosphate carboxylase activity (GO:0016984);; Biological Process: reductive pentose-phosphate cycle (GO:0019253);; Biological Process: oxidation-reduction process (GO:0055114);;	K01602|9.80048e-24|sot:102577450|K01602 ribulose-bisphosphate carboxylase small chain [EC:4.1.1.39] | (RefSeq) ribulose bisphosphate carboxylase small chain 1, chloroplastic-like	--	--	Ribulose bisphosphate carboxylase, small chain	Ribulose bisphosphate carboxylase small chain 1, chloroplastic OS=Solanum tuberosum OX=4113 GN=RBCS-1 PE=3 SV=1	C	Energy production and conversion	ribulose 1,5-bisphosphate carboxylase/oxygenase small subunit (rbcS) [Ipomoea batatas]
c1036675.graph_c0	--	--	--	K12169|8.97879e-21|jcu:105636533|K12169 Kip1 ubiquitination-promoting complex protein 1 [EC:2.3.2.27] | (RefSeq) E3 ubiquitin-protein ligase RKP	[A]	RNA processing and modification	SPRY domain;; Cullin binding	E3 ubiquitin-protein ligase RKP OS=Arabidopsis thaliana OX=3702 GN=RKP PE=2 SV=2	S	Function unknown	unnamed protein product [Coffea canephora]
c1036705.graph_c1	[T]	Signal transduction mechanisms	--	--	[M]	Cell wall/membrane/envelope biogenesis	Ankyrin repeats (many copies);; Ankyrin repeats (3 copies);; Ankyrin repeat;; Ankyrin repeat;; Ankyrin repeats (many copies)	--	S	Function unknown	ankyrin 2,3/unc44 [Cordyceps brongniartii RCEF 3172]
c1036715.graph_c1	--	--	--	K02889|1.95172e-08|mus:103985036|K02889 large subunit ribosomal protein L21e | (RefSeq) 60S ribosomal protein L21-1-like	[J]	Translation, ribosomal structure and biogenesis	--	60S ribosomal protein L21-1 OS=Arabidopsis thaliana OX=3702 GN=RPL21A PE=2 SV=2	J	Translation, ribosomal structure and biogenesis	hypothetical protein BOTBODRAFT_157927 [Botryobasidium botryosum FD-172 SS1]
c1036750.graph_c0	--	--	--	--	--	--	Ependymin;; Lytic polysaccharide mono-oxygenase, cellulose-degrading	--	S	Function unknown	--
c1036783.graph_c0	[O]	Posttranslational modification, protein turnover, chaperones	Molecular Function: ATP binding (GO:0005524);; Cellular Component: cytosol (GO:0005829);; Biological Process: protein folding (GO:0006457);; Molecular Function: unfolded protein binding (GO:0051082);;	K09499|8.70126e-70|cvr:CHLNCDRAFT_58635|K09499 T-complex protein 1 subunit eta | (RefSeq) hypothetical protein	[O]	Posttranslational modification, protein turnover, chaperones	TCP-1/cpn60 chaperonin family	T-complex protein 1 subunit eta OS=Arabidopsis thaliana OX=3702 GN=CCT7 PE=1 SV=1	O	Posttranslational modification, protein turnover, chaperones	predicted protein [Hordeum vulgare subsp. vulgare]
c1036783.graph_c1	[O]	Posttranslational modification, protein turnover, chaperones	Molecular Function: ATP binding (GO:0005524);; Cellular Component: nucleus (GO:0005634);; Cellular Component: chaperonin-containing T-complex (GO:0005832);; Biological Process: protein folding (GO:0006457);; Molecular Function: unfolded protein binding (GO:0051082);;	K09499|1.2334e-127|cmo:103492457|K09499 T-complex protein 1 subunit eta | (RefSeq) T-complex protein 1 subunit eta	[O]	Posttranslational modification, protein turnover, chaperones	TCP-1/cpn60 chaperonin family	T-complex protein 1 subunit eta OS=Arabidopsis thaliana OX=3702 GN=CCT7 PE=1 SV=1	O	Posttranslational modification, protein turnover, chaperones	predicted protein [Hordeum vulgare subsp. vulgare]
c1036890.graph_c0	[J]	Translation, ribosomal structure and biogenesis	Biological Process: ribosomal small subunit assembly (GO:0000028);; Molecular Function: structural constituent of ribosome (GO:0003735);; Biological Process: translation (GO:0006412);; Cellular Component: cytosolic small ribosomal subunit (GO:0022627);;	K02962|1.09081e-52|gsl:Gasu_06000|K02962 small subunit ribosomal protein S17e | (RefSeq) 40S ribosomal protein S17	[J]	Translation, ribosomal structure and biogenesis	Ribosomal S17	40S ribosomal protein S17 OS=Solanum lycopersicum OX=4081 GN=RPS17 PE=2 SV=3	J	Translation, ribosomal structure and biogenesis	40S ribosomal protein S17 [Ectocarpus siliculosus]
c1036893.graph_c0	[K]	Transcription	Molecular Function: nucleic acid binding (GO:0003676);; Molecular Function: metal ion binding (GO:0046872);;	--	[J]	Translation, ribosomal structure and biogenesis	'Cold-shock' DNA-binding domain	Glycine-rich protein 2 OS=Nicotiana sylvestris OX=4096 GN=GRP-2 PE=2 SV=1	K	Transcription	hypothetical protein BOTBODRAFT_29480 [Botryobasidium botryosum FD-172 SS1]
c1036949.graph_c0	[J]	Translation, ribosomal structure and biogenesis	Molecular Function: structural constituent of ribosome (GO:0003735);; Cellular Component: cytosol (GO:0005829);; Cellular Component: ribosome (GO:0005840);; Biological Process: translation (GO:0006412);;	K02929|4.1365e-29|pda:103708405|K02929 large subunit ribosomal protein L44e | (RefSeq) 60S ribosomal protein L44-like	[J]	Translation, ribosomal structure and biogenesis	Ribosomal protein L44	60S ribosomal protein L36a OS=Arabidopsis thaliana OX=3702 GN=RPL36AA PE=3 SV=3	J	Translation, ribosomal structure and biogenesis	hypothetical protein ASPWEDRAFT_53541 [Aspergillus wentii DTO 134E9]
c1036979.graph_c0	[J]	Translation, ribosomal structure and biogenesis	--	--	[J]	Translation, ribosomal structure and biogenesis	Elongation factor TS	Elongation factor Ts, mitochondrial OS=Ricinus communis OX=3988 GN=EFTS PE=3 SV=1	--	--	hypothetical protein SPPG_01503 [Spizellomyces punctatus DAOM BR117]
c1037006.graph_c0	--	--	--	--	--	--	--	--	S	Function unknown	transcript antisense to ribosomal RNA protein, partial [Histoplasma capsulatum H88]
c1037044.graph_c0	[VT]	--	--	--	--	--	GAF domain;; GAF domain	--	T	Signal transduction mechanisms	GAF domain-like protein [Lobosporangium transversale]
c1037051.graph_c0	[R]	General function prediction only	--	K07874|2.48908e-33|bvg:104884368|K07874 Ras-related protein Rab-1A | (RefSeq) GTP-binding protein YPTM2-like	[TU]	--	Ras family;; Ras of Complex, Roc, domain of DAPkinase;; 50S ribosome-binding GTPase;; ADP-ribosylation factor family	Ras-like GTP-binding protein YPT1 OS=Phytophthora infestans OX=4787 GN=YPT1 PE=3 SV=1	S	Function unknown	GTP-binding protein YPTM2 [Spinacia oleracea]
c1037088.graph_c0	--	--	--	--	--	--	Protein of unknown function (DUF740)	--	S	Function unknown	PREDICTED: uncharacterized protein LOC101490734 [Cicer arietinum]
c1037101.graph_c0	[IQR]	--	Molecular Function: oxidoreductase activity (GO:0016491);;	--	[QR]	--	short chain dehydrogenase;; Enoyl-(Acyl carrier protein) reductase;; Fungal family of unknown function (DUF1776)	Tropinone reductase homolog At2g29260, chloroplastic OS=Arabidopsis thaliana OX=3702 GN=At2g29260 PE=2 SV=1	S	Function unknown	short-chain dehydrogenase reductase sdr [Nannochloropsis gaditana CCMP526]
c1037172.graph_c0	[J]	Translation, ribosomal structure and biogenesis	Biological Process: ribosomal large subunit assembly (GO:0000027);; Molecular Function: structural constituent of ribosome (GO:0003735);; Biological Process: translation (GO:0006412);; Molecular Function: 5S rRNA binding (GO:0008097);; Cellular Component: cytosolic large ribosomal subunit (GO:0022625);;	K02932|1.9057e-42|sly:101262823|K02932 large subunit ribosomal protein L5e | (RefSeq) 60S ribosomal protein L5	[J]	Translation, ribosomal structure and biogenesis	--	60S ribosomal protein L5 OS=Helianthus annuus OX=4232 GN=RPL5A PE=2 SV=1	J	Translation, ribosomal structure and biogenesis	rpl5, partial [Blastocystis sp. ATCC 50177/Nand II]
c1037172.graph_c1	[J]	Translation, ribosomal structure and biogenesis	--	K02932|1.07698e-33|zma:100284917|K02932 large subunit ribosomal protein L5e | (RefSeq) GRMZM2G163081; 60S ribosomal protein L5-1	[J]	Translation, ribosomal structure and biogenesis	Ribosomal large subunit proteins 60S L5, and 50S L18;; Ribosomal L18 C-terminal region	60S ribosomal protein L5-2 OS=Arabidopsis thaliana OX=3702 GN=RPL5B PE=2 SV=3	J	Translation, ribosomal structure and biogenesis	hypothetical protein ASPBRDRAFT_205847 [Aspergillus brasiliensis CBS 101740]
c1037173.graph_c0	--	--	Molecular Function: RNA binding (GO:0003723);; Molecular Function: structural constituent of ribosome (GO:0003735);; Biological Process: translation (GO:0006412);; Biological Process: ribonucleoprotein complex assembly (GO:0022618);; Cellular Component: cytosolic large ribosomal subunit (GO:0022625);;	K02923|1.26003e-20|olu:OSTLU_17408|K02923 large subunit ribosomal protein L38e | (RefSeq) RPL38; Ribosomal protein L38, component of cytosolic 80S ribosome and 60S large subunit	[J]	Translation, ribosomal structure and biogenesis	Ribosomal L38e protein family	60S ribosomal protein L38 OS=Solanum lycopersicum OX=4081 GN=RPL38 PE=3 SV=1	J	Translation, ribosomal structure and biogenesis	hypothetical protein BATDEDRAFT_91609 [Batrachochytrium dendrobatidis JAM81]
c1037237.graph_c0	[T]	Signal transduction mechanisms	Molecular Function: protein serine/threonine kinase activity (GO:0004674);; Molecular Function: non-membrane spanning protein tyrosine kinase activity (GO:0004715);; Molecular Function: ATP binding (GO:0005524);; Cellular Component: plasma membrane (GO:0005886);; Biological Process: peptidyl-tyrosine phosphorylation (GO:0018108);;	--	[T]	Signal transduction mechanisms	Protein tyrosine kinase;; Protein kinase domain	Probable serine/threonine-protein kinase PBL8 OS=Arabidopsis thaliana OX=3702 GN=PBL8 PE=1 SV=1	T	Signal transduction mechanisms	probable serine/threonine-protein kinase PBL8 [Arachis ipaensis]
c1037241.graph_c0	[R]	General function prediction only	Molecular Function: structural constituent of ribosome (GO:0003735);; Molecular Function: GTP binding (GO:0005525);; Cellular Component: ribosome (GO:0005840);; Biological Process: translation (GO:0006412);; Biological Process: small GTPase mediated signal transduction (GO:0007264);;	K07950|9.35306e-80|sind:105158415|K07950 ADP-ribosylation factor-like protein 5B | (RefSeq) ADP-ribosylation factor-like protein 5	[U]	Intracellular trafficking, secretion, and vesicular transport	ADP-ribosylation factor family;; Ras of Complex, Roc, domain of DAPkinase;; Signal recognition particle receptor beta subunit;; Ras family;; Gtr1/RagA G protein conserved region;; 50S ribosome-binding GTPase	ADP-ribosylation factor OS=Zea mays OX=4577 GN=ARF1 PE=2 SV=2	S	Function unknown	ADP-ribosylation factor-like protein 5A [Mortierella verticillata NRRL 6337]
c1037296.graph_c0	[M]	Cell wall/membrane/envelope biogenesis	Molecular Function: ion binding (GO:0043167);;	K03098|5.32394e-25|ppp:PHYPADRAFT_114767|K03098 apolipoprotein D and lipocalin family protein | (RefSeq) hypothetical protein	[M]	Cell wall/membrane/envelope biogenesis	Lipocalin-like domain;; Lipocalin / cytosolic fatty-acid binding protein family	Temperature-induced lipocalin-1 OS=Arabidopsis thaliana OX=3702 GN=TIL PE=1 SV=1	M	Cell wall/membrane/envelope biogenesis	predicted protein [Physcomitrella patens]
c1037309.graph_c0	[R]	General function prediction only	--	--	[E]	Amino acid transport and metabolism	Hexapeptide repeat of succinyl-transferase;; Bacterial transferase hexapeptide (six repeats);; Maltose acetyltransferase	Serine acetyltransferase 4 OS=Arabidopsis thaliana OX=3702 GN=SAT4 PE=1 SV=1	--	--	maltose o-acetyltransferase [Rhizophagus irregularis DAOM 181602]
c1037392.graph_c0	[E]	Amino acid transport and metabolism	Molecular Function: serine-type carboxypeptidase activity (GO:0004185);; Biological Process: proteolysis involved in cellular protein catabolic process (GO:0051603);;	K16298|8.96433e-120|aip:107625393|K16298 serine carboxypeptidase-like clade IV [EC:3.4.16.-] | (RefSeq) serine carboxypeptidase-like	[OE]	--	Serine carboxypeptidase	Serine carboxypeptidase 3 OS=Oryza sativa subsp. japonica OX=39947 GN=CBP3 PE=2 SV=1	E	Amino acid transport and metabolism	serine protease family S10, putative [Pythium insidiosum]
c1037399.graph_c0	[H]	Coenzyme transport and metabolism	Molecular Function: nicotinate phosphoribosyltransferase activity (GO:0004516);; Cellular Component: cytoplasm (GO:0005737);; Biological Process: nicotinate nucleotide salvage (GO:0019358);;	K00763|3.30271e-59|bna:106411400|K00763 nicotinate phosphoribosyltransferase [EC:6.3.4.21] | (RefSeq) nicotinate phosphoribosyltransferase 1	[H]	Coenzyme transport and metabolism	--	Nicotinate phosphoribosyltransferase 1 OS=Arabidopsis thaliana OX=3702 GN=NAPRT1 PE=2 SV=1	H	Coenzyme transport and metabolism	nicotinate phosphoribosyltransferase [Klebsormidium nitens]
c1037404.graph_c0	[O]	Posttranslational modification, protein turnover, chaperones	--	K13993|2.17209e-14|gra:105771388|K13993 HSP20 family protein | (RefSeq) 18.2 kDa class I heat shock protein-like	[O]	Posttranslational modification, protein turnover, chaperones	Hsp20/alpha crystallin family	17.3 kDa class I heat shock protein OS=Glycine max OX=3847 GN=HSP17.3-B PE=3 SV=1	O	Posttranslational modification, protein turnover, chaperones	heat shock protein HSP20 [Blastocystis sp. subtype 4]
c1037414.graph_c0	--	--	--	K02183|5.14674e-18|mpp:MICPUCDRAFT_49475|K02183 calmodulin | (RefSeq) CAM; calmodulin	[T]	Signal transduction mechanisms	EF-hand domain pair;; EF-hand domain;; EF hand	Calmodulin OS=Prorocentrum minimum OX=39449 PE=2 SV=1	DTZ	--	Putative Calmodulin [Rhizopus microsporus]
c1037494.graph_c0	--	--	Biological Process: regulation of metabolic process (GO:0019222);; Biological Process: cellular metabolic process (GO:0044237);; Biological Process: primary metabolic process (GO:0044238);; Cellular Component: intracellular part (GO:0044424);; Biological Process: regulation of cellular process (GO:0050794);; Biological Process: organic substance metabolic process (GO:0071704);;	--	[C]	Energy production and conversion	CBS domain	SNF1-related protein kinase regulatory subunit gamma-1 OS=Arabidopsis thaliana OX=3702 GN=KING1 PE=1 SV=2	S	Function unknown	Protein SDS23, partial [Choanephora cucurbitarum]
c1037519.graph_c0	[C]	Energy production and conversion	Molecular Function: aldehyde dehydrogenase [NAD(P)+] activity (GO:0004030);; Cellular Component: extracellular region (GO:0005576);; Biological Process: ethanol metabolic process (GO:0006067);; Biological Process: threonine catabolic process (GO:0006567);; Molecular Function: lactaldehyde dehydrogenase activity (GO:0008911);; Biological Process: methylglyoxal metabolic process (GO:0009438);; Mole…	K00128|7.43236e-168|smo:SELMODRAFT_180171|K00128 aldehyde dehydrogenase (NAD+) [EC:1.2.1.3] | (RefSeq) hypothetical protein	[C]	Energy production and conversion	Aldehyde dehydrogenase family	Aldehyde dehydrogenase family 2 member B7, mitochondrial OS=Arabidopsis thaliana OX=3702 GN=ALDH2B7 PE=1 SV=2	C	Energy production and conversion	hypothetical protein BSLG_00370 [Batrachochytrium salamandrivorans]
c1037529.graph_c0	[O]	Posttranslational modification, protein turnover, chaperones	Cellular Component: mitochondrial matrix (GO:0005759);; Biological Process: response to unfolded protein (GO:0006986);; Molecular Function: metal ion binding (GO:0046872);; Molecular Function: unfolded protein binding (GO:0051082);; Biological Process: chaperone mediated protein folding requiring cofactor (GO:0051085);; Molecular Function: chaperone binding (GO:0051087);;	K04078|1.05914e-24|pxb:103961033|K04078 chaperonin GroES | (RefSeq) 10 kDa chaperonin-like	[O]	Posttranslational modification, protein turnover, chaperones	Chaperonin 10 Kd subunit	10 kDa chaperonin, mitochondrial OS=Arabidopsis thaliana OX=3702 GN=CPN10 PE=1 SV=1	O	Posttranslational modification, protein turnover, chaperones	hypothetical protein EMIHUDRAFT_373699 [Emiliania huxleyi CCMP1516]
c1037553.graph_c0	[I]	Lipid transport and metabolism	--	--	[I]	Lipid transport and metabolism	4F5 protein family	Delta(3,5)-Delta(2,4)-dienoyl-CoA isomerase, peroxisomal OS=Arabidopsis thaliana OX=3702 GN=DCI1 PE=2 SV=1	I	Lipid transport and metabolism	ClpP/crotonase-like domain-containing protein [Lobosporangium transversale]
c1037568.graph_c0	--	--	--	--	--	--	Cerato-platanin	--	S	Function unknown	hypothetical protein M427DRAFT_57159 [Gonapodya prolifera JEL478]
c1037591.graph_c0	[E]	Amino acid transport and metabolism	Molecular Function: catalytic activity (GO:0003824);;	K01640|8.16832e-132|sita:101770392|K01640 hydroxymethylglutaryl-CoA lyase [EC:4.1.3.4] | (RefSeq) hydroxymethylglutaryl-CoA lyase, mitochondrial-like	[CE]	--	HMGL-like	Hydroxymethylglutaryl-CoA lyase, mitochondrial OS=Arabidopsis thaliana OX=3702 GN=HMGCL PE=1 SV=2	E	Amino acid transport and metabolism	hypothetical protein, variant [Phytophthora parasitica CJ01A1]
c1037613.graph_c0	--	--	--	--	--	--	PA14 domain	--	S	Function unknown	hypothetical protein EMIHUDRAFT_253653, partial [Emiliania huxleyi CCMP1516]
c1037628.graph_c0	--	--	--	K14491|1.77487e-06|sita:101758368|K14491 two-component response regulator ARR-B family | (RefSeq) two-component response regulator EHD1-like	--	--	--	Two-component response regulator ORR30 OS=Oryza sativa subsp. japonica OX=39947 GN=EHD1 PE=1 SV=1	--	--	--
c1037650.graph_c0	[M]	Cell wall/membrane/envelope biogenesis	--	--	--	--	Galactose oxidase, central domain;; Kelch motif;; Galactose oxidase, central domain;; Kelch motif;; Kelch motif;; Kelch motif	--	S	Function unknown	Leucine-zipper-like transcriptional regulator 1 [Symbiodinium microadriaticum]
c1037732.graph_c0	--	--	Molecular Function: protein kinase activity (GO:0004672);; Molecular Function: ATP binding (GO:0005524);; Biological Process: protein phosphorylation (GO:0006468);; Cellular Component: integral component of membrane (GO:0016021);;	--	[T]	Signal transduction mechanisms	Protein tyrosine kinase;; Protein kinase domain	Probable inactive receptor-like protein kinase At3g56050 OS=Arabidopsis thaliana OX=3702 GN=At3g56050 PE=2 SV=1	T	Signal transduction mechanisms	putative LRR receptor-like serine/threonine-protein kinase At5g45840 family [Cajanus cajan]
c1037751.graph_c1	[O]	Posttranslational modification, protein turnover, chaperones	Molecular Function: ATP binding (GO:0005524);; Biological Process: protein folding (GO:0006457);; Biological Process: response to stress (GO:0006950);; Molecular Function: kinase activity (GO:0016301);; Biological Process: phosphorylation (GO:0016310);; Molecular Function: unfolded protein binding (GO:0051082);;	K09487|1.3942e-138|ccp:CHC_T00004017001|K09487 heat shock protein 90kDa beta | (RefSeq) hypothetical protein	[O]	Posttranslational modification, protein turnover, chaperones	Hsp90 protein	Endoplasmin homolog OS=Arabidopsis thaliana OX=3702 GN=HSP90-7 PE=1 SV=1	O	Posttranslational modification, protein turnover, chaperones	Hypothetical protein PINS_004203 [Pythium insidiosum]
c1037773.graph_c0	--	--	--	--	--	--	--	--	S	Function unknown	hypothetical protein glysoja_018018 [Glycine soja]
c1037838.graph_c0	[T]	Signal transduction mechanisms	--	K13447|8.20868e-70|vvi:100262101|K13447 respiratory burst oxidase [EC:1.6.3.- 1.11.1.-] | (RefSeq) respiratory burst oxidase homolog protein A	[PQ]	--	Ferric reductase NAD binding domain;; FAD-binding domain;; Ferric reductase like transmembrane component	Respiratory burst oxidase homolog protein A OS=Solanum tuberosum OX=4113 GN=RBOHA PE=1 SV=1	U	Intracellular trafficking, secretion, and vesicular transport	hypothetical protein RhiirC2_761251 [Rhizophagus irregularis]
c1037860.graph_c0	[Q]	Secondary metabolites biosynthesis, transport and catabolism	Molecular Function: urate oxidase activity (GO:0004846);; Cellular Component: peroxisome (GO:0005777);; Biological Process: purine nucleobase metabolic process (GO:0006144);; Biological Process: urate catabolic process (GO:0019628);; Biological Process: oxidation-reduction process (GO:0055114);;	K00365|1.53526e-62|aip:107625653|K00365 urate oxidase [EC:1.7.3.3] | (RefSeq) uricase-2 isozyme 2-like	[Q]	Secondary metabolites biosynthesis, transport and catabolism	Uricase	Uricase-2 isozyme 2 OS=Glycine max OX=3847 PE=1 SV=1	Q	Secondary metabolites biosynthesis, transport and catabolism	uricase, putative [Phytophthora infestans T30-4]
c1037868.graph_c0	[J]	Translation, ribosomal structure and biogenesis	Molecular Function: structural constituent of ribosome (GO:0003735);; Biological Process: translation (GO:0006412);; Cellular Component: cytosolic large ribosomal subunit (GO:0022625);;	K02912|1.1853e-50|sind:105170109|K02912 large subunit ribosomal protein L32e | (RefSeq) 60S ribosomal protein L32-1-like	[J]	Translation, ribosomal structure and biogenesis	Ribosomal protein L32	60S ribosomal protein L32-1 OS=Arabidopsis thaliana OX=3702 GN=RPL32A PE=2 SV=2	J	Translation, ribosomal structure and biogenesis	ribosomal protein L32e [Basidiobolus meristosporus CBS 931.73]
c1037873.graph_c0	[C]	Energy production and conversion	Cellular Component: mitochondrion (GO:0005739);; Molecular Function: electron carrier activity (GO:0009055);; Molecular Function: heme binding (GO:0020037);; Molecular Function: metal ion binding (GO:0046872);; Biological Process: oxidation-reduction process (GO:0055114);; Cellular Component: respiratory chain (GO:0070469);;	K08738|2.85201e-51|cme:CYME_CMJ212C|K08738 cytochrome c | (RefSeq) similar to cytochrome c	[C]	Energy production and conversion	Cytochrome c;; Cytochrome C oxidase, cbb3-type, subunit III	Cytochrome c OS=Sesamum indicum OX=4182 PE=1 SV=1	C	Energy production and conversion	Putative Cytochrome c [Lichtheimia ramosa]
c1037896.graph_c1	--	--	--	--	--	--	WH2 motif	--	S	Function unknown	hypothetical protein EMIHUDRAFT_67535 [Emiliania huxleyi CCMP1516]
c1037938.graph_c2	--	--	Cellular Component: endomembrane system (GO:0012505);; Biological Process: vesicle-mediated transport (GO:0016192);; Cellular Component: membrane-bounded organelle (GO:0043227);; Cellular Component: intracellular organelle (GO:0043229);; Cellular Component: membrane part (GO:0044425);; Cellular Component: cytoplasmic part (GO:0044444);;	K20363|1.01696e-27|ccp:CHC_T00002301001|K20363 protein transport protein YIP1 | (RefSeq) hypothetical protein	[U]	Intracellular trafficking, secretion, and vesicular transport	Yip1 domain	--	U	Intracellular trafficking, secretion, and vesicular transport	hypothetical protein BCR43DRAFT_473429 [Syncephalastrum racemosum]
c1037940.graph_c0	[I]	Lipid transport and metabolism	--	--	--	--	Methyltransferase domain;; Protein-L-isoaspartate(D-aspartate) O-methyltransferase (PCMT);; ubiE/COQ5 methyltransferase family;; O-methyltransferase	--	S	Function unknown	--
c1038104.graph_c0	--	--	--	--	--	--	--	--	--	--	chitin binding domain-containing protein [Pochonia chlamydosporia 170]
c1038128.graph_c0	--	--	--	--	[TZ]	--	LIM domain	Protein DA1 OS=Arabidopsis thaliana OX=3702 GN=DA1 PE=1 SV=1	S	Function unknown	paxillin [Pecoramyces ruminatium]
c1038156.graph_c0	[C]	Energy production and conversion	--	K00236|1.54024e-15|ota:Ot06g03360|K00236 succinate dehydrogenase (ubiquinone) cytochrome b560 subunit | (RefSeq) hypothetical protein	[G]	Carbohydrate transport and metabolism	Succinate dehydrogenase/Fumarate reductase transmembrane subunit	Succinate dehydrogenase cytochrome b560 subunit OS=Marchantia polymorpha OX=3197 GN=SDH3 PE=3 SV=1	C	Energy production and conversion	hypothetical protein DI09_32p10 [Mitosporidium daphniae]
c1038173.graph_c0	[O]	Posttranslational modification, protein turnover, chaperones	Biological Process: protein polyubiquitination (GO:0000209);; Molecular Function: DNA binding (GO:0003677);; Molecular Function: ATP binding (GO:0005524);; Cellular Component: cytoplasm (GO:0005737);; Biological Process: DNA repair (GO:0006281);; Biological Process: histone ubiquitination (GO:0016574);; Molecular Function: ubiquitin protein ligase binding (GO:0031625);; Biological Process: protea…	K10573|6.50706e-80|mtr:MTR_8g468530|K10573 ubiquitin-conjugating enzyme E2 A [EC:2.3.2.23] | (RefSeq) ubiquitin-conjugating enzyme	[O]	Posttranslational modification, protein turnover, chaperones	Ubiquitin-conjugating enzyme	Ubiquitin-conjugating enzyme E2 2 OS=Medicago sativa OX=3879 GN=UBC2 PE=2 SV=1	O	Posttranslational modification, protein turnover, chaperones	ubiquitin-conjugating enzyme E2, putative [Phytophthora infestans T30-4]
c1038183.graph_c0	[J]	Translation, ribosomal structure and biogenesis	Molecular Function: nucleotide binding (GO:0000166);; Biological Process: translation (GO:0006412);;	K03234|6.87778e-51|mdm:103409090|K03234 elongation factor 2 | (RefSeq) elongation factor 2-like	[J]	Translation, ribosomal structure and biogenesis	Elongation factor G C-terminus	Elongation factor 2 OS=Beta vulgaris OX=161934 PE=2 SV=1	J	Translation, ribosomal structure and biogenesis	hypothetical protein GOBAR_AA33189 [Gossypium barbadense]
c1038189.graph_c0	--	--	--	--	[DZ]	--	Translationally controlled tumour protein	Translationally-controlled tumor protein homolog OS=Pseudotsuga menziesii OX=3357 GN=TCTP PE=2 SV=1	S	Function unknown	conserved unknown protein [Ectocarpus siliculosus]
c1038200.graph_c0	--	--	--	--	--	--	--	--	S	Function unknown	Hypothetical protein PINS_010532, partial [Pythium insidiosum]
c1038203.graph_c0	[J]	Translation, ribosomal structure and biogenesis	Molecular Function: structural constituent of ribosome (GO:0003735);; Cellular Component: mitochondrion (GO:0005739);; Biological Process: translation (GO:0006412);; Cellular Component: cytosolic large ribosomal subunit (GO:0022625);;	K02885|7.1619e-57|atr:18428683|K02885 large subunit ribosomal protein L19e | (RefSeq) 60S ribosomal protein L19-3	[J]	Translation, ribosomal structure and biogenesis	Ribosomal protein L19e	60S ribosomal protein L19-3 OS=Arabidopsis thaliana OX=3702 GN=RPL19C PE=2 SV=3	J	Translation, ribosomal structure and biogenesis	60S ribosomal protein L19-3 [Amborella trichopoda]
c1038207.graph_c0	--	--	--	K09660|4.92064e-30|cme:CYME_CMS442C|K09660 mannose-P-dolichol utilization defect 1 | (RefSeq) hypothetical protein	[R]	General function prediction only	PQ loop repeat	Mannose-P-dolichol utilization defect 1 protein homolog 2 OS=Arabidopsis thaliana OX=3702 GN=At4g07390 PE=2 SV=1	S	Function unknown	mannose-P-dolichol utilization defect 1 protein [Neocallimastix californiae]
c1038218.graph_c0	--	--	Cellular Component: intracellular (GO:0005622);;	K02873|8.87951e-58|tcc:TCM_002060|K02873 large subunit ribosomal protein L13e | (RefSeq) 60S ribosomal protein L13	[J]	Translation, ribosomal structure and biogenesis	Ribosomal protein L13e	60S ribosomal protein L13-1 OS=Arabidopsis thaliana OX=3702 GN=RPL13B PE=1 SV=1	J	Translation, ribosomal structure and biogenesis	60S ribosomal protein L13 [Theobroma cacao]
c1038254.graph_c0	[R]	General function prediction only	--	K03363|1.39676e-135|gsl:Gasu_21580|K03363 cell division cycle 20, cofactor of APC complex | (RefSeq) cell division cycle 2, cofactor of APC complex	[DO]	--	WD domain, G-beta repeat;; Anaphase-promoting complex subunit 4 WD40 domain;; Eukaryotic translation initiation factor eIF2A	Cell division cycle 20.1, cofactor of APC complex OS=Arabidopsis thaliana OX=3702 GN=CDC20-1 PE=1 SV=1	S	Function unknown	cell division cycle 2, cofactor of APC complex [Galdieria sulphuraria]
c1038261.graph_c0	[C]	Energy production and conversion	--	K00236|1.83997e-12|ppp:PhpafMp15|K00236 succinate dehydrogenase (ubiquinone) cytochrome b560 subunit | (RefSeq) sdh3; succinate dehydrogenase subunit 3	[G]	Carbohydrate transport and metabolism	Succinate dehydrogenase/Fumarate reductase transmembrane subunit;; Competence protein	Succinate dehydrogenase cytochrome b560 subunit OS=Marchantia polymorpha OX=3197 GN=SDH3 PE=3 SV=1	C	Energy production and conversion	succinate dehydrogenase, cytochrome b556 subunit [Pichia kudriavzevii]
c1038342.graph_c0	[I]	Lipid transport and metabolism	Molecular Function: fatty-acyl-CoA binding (GO:0000062);; Biological Process: chronological cell aging (GO:0001300);; Molecular Function: long-chain fatty acid transporter activity (GO:0005324);; Cellular Component: extracellular region (GO:0005576);; Cellular Component: nucleus (GO:0005634);; Cellular Component: cytosol (GO:0005829);; Biological Process: fatty acid metabolic process (GO:0006631)…	K08762|8.61598e-23|olu:OSTLU_32604|K08762 diazepam-binding inhibitor (GABA receptor modulator, acyl-CoA-binding protein) | (RefSeq) hypothetical protein	[I]	Lipid transport and metabolism	Acyl CoA binding protein	Acyl-CoA-binding protein OS=Brassica napus OX=3708 PE=3 SV=1	I	Lipid transport and metabolism	acyl-CoA-binding protein [Basidiobolus meristosporus CBS 931.73]
c1038368.graph_c0	--	--	Biological Process: actin cortical patch assembly (GO:0000147);; Molecular Function: actin binding (GO:0003779);; Molecular Function: structural molecule activity (GO:0005198);; Cellular Component: Arp2/3 protein complex (GO:0005885);; Cellular Component: actin cortical patch (GO:0030479);; Biological Process: Arp2/3 complex-mediated actin nucleation (GO:0034314);;	K05755|3.97951e-76|jcu:105639389|K05755 actin related protein 2/3 complex, subunit 4 | (RefSeq) actin-related protein 2/3 complex subunit 4	[Z]	Cytoskeleton	ARP2/3 complex 20 kDa subunit (ARPC4)	Actin-related protein 2/3 complex subunit 4 OS=Arabidopsis thaliana OX=3702 GN=ARPC4 PE=1 SV=1	S	Function unknown	hypothetical protein A4X09_g258 [Tilletia walkeri]
c1038409.graph_c0	[T]	Signal transduction mechanisms	Cellular Component: intracellular part (GO:0044424);;	--	[K]	Transcription	Ankyrin repeats (3 copies);; Ankyrin repeats (many copies);; Ankyrin repeats (many copies);; Ankyrin repeat;; Ankyrin repeat	Potassium channel KOR1 OS=Oryza sativa subsp. japonica OX=39947 GN=Os06g0250600 PE=2 SV=1	S	Function unknown	hypothetical protein AXG93_3556s1110 [Marchantia polymorpha subsp. ruderalis]
c1038524.graph_c0	--	--	--	--	--	--	--	--	S	Function unknown	--
c1038541.graph_c0	--	--	--	--	[O]	Posttranslational modification, protein turnover, chaperones	Zinc knuckle;; Zinc knuckle	Cold shock protein 1 OS=Arabidopsis thaliana OX=3702 GN=CSP1 PE=1 SV=1	OU	--	hypothetical protein BJF96_g1543 [Verticillium dahliae]
c1038560.graph_c0	[R]	General function prediction only	--	--	--	--	Domain of unknown function (DUF4476);; von Willebrand factor type A domain;; von Willebrand factor type A domain	--	S	Function unknown	von willebrand factor type a domain containing protein [Chrysochromulina sp. CCMP291]
c1038572.graph_c0	--	--	Biological Process: maturation of LSU-rRNA from tricistronic rRNA transcript (SSU-rRNA, 5.8S rRNA, LSU-rRNA) (GO:0000463);; Molecular Function: mRNA binding (GO:0003729);; Molecular Function: structural constituent of ribosome (GO:0003735);; Cellular Component: nucleolus (GO:0005730);; Biological Process: translation (GO:0006412);; Cellular Component: cytosolic large ribosomal subunit (GO:0022625…	K02918|8.23513e-32|csl:COCSUDRAFT_28397|K02918 large subunit ribosomal protein L35e | (RefSeq) hypothetical protein	[J]	Translation, ribosomal structure and biogenesis	Ribosomal L29 protein	60S ribosomal protein L35-4 OS=Arabidopsis thaliana OX=3702 GN=RPL35D PE=2 SV=1	J	Translation, ribosomal structure and biogenesis	hypothetical protein COCSUDRAFT_28397 [Coccomyxa subellipsoidea C-169]
c1038578.graph_c0	[T]	Signal transduction mechanisms	Molecular Function: kinase activity (GO:0016301);;	K07359|1.47152e-17|apro:F751_4242|K07359 calcium/calmodulin-dependent protein kinase kinase 2 [EC:2.7.11.17] | (RefSeq) Serine/threonine-protein kinase ssp1	[T]	Signal transduction mechanisms	Protein kinase domain;; Protein tyrosine kinase	Calcium-dependent protein kinase 18 OS=Arabidopsis thaliana OX=3702 GN=CPK18 PE=2 SV=1	T	Signal transduction mechanisms	kinase-like protein, partial [Fragilariopsis cylindrus CCMP1102]
c1038588.graph_c0	--	--	--	--	--	--	SH2 domain	--	--	--	--
c1038593.graph_c0	[R]	General function prediction only	Molecular Function: methyltransferase activity (GO:0008168);;	--	[Q]	Secondary metabolites biosynthesis, transport and catabolism	O-methyltransferase;; Methyltransferase domain;; Methyltransferase domain;; Protein-L-isoaspartate(D-aspartate) O-methyltransferase (PCMT)	Caffeoyl-CoA O-methyltransferase 2 OS=Zea mays OX=4577 GN=CCOAOMT2 PE=2 SV=1	S	Function unknown	o-methyltransferase [Dorcoceras hygrometricum]
c1038616.graph_c0	--	--	--	--	--	--	--	--	S	Function unknown	--
c1038642.graph_c0	[Q]	Secondary metabolites biosynthesis, transport and catabolism	Cellular Component: cytosol (GO:0005829);; Cellular Component: chloroplast (GO:0009507);; Biological Process: response to zinc ion (GO:0010043);;	K01061|3.86617e-60|csv:101222245|K01061 carboxymethylenebutenolidase [EC:3.1.1.45] | (RefSeq) carboxymethylenebutenolidase homolog	[R]	General function prediction only	Dienelactone hydrolase family	--	Q	Secondary metabolites biosynthesis, transport and catabolism	hypothetical protein SPPG_03665 [Spizellomyces punctatus DAOM BR117]
c1038658.graph_c0	[IQR]	--	--	K11168|8.36728e-34|smo:SELMODRAFT_270991|K11168 dehydrogenase/reductase SDR family member 12 [EC:1.1.-.-] | (RefSeq) hypothetical protein	[Q]	Secondary metabolites biosynthesis, transport and catabolism	short chain dehydrogenase;; Enoyl-(Acyl carrier protein) reductase;; KR domain	Short-chain dehydrogenase TIC 32, chloroplastic OS=Pisum sativum OX=3888 GN=TIC32 PE=1 SV=1	S	Function unknown	Env9p [Rhizophagus irregularis DAOM 197198w]
c1038674.graph_c0	--	--	--	--	--	--	PX domain	--	--	--	putative Sorting nexin [Taphrina deformans PYCC 5710]
c1038680.graph_c0	[O]	Posttranslational modification, protein turnover, chaperones	--	K09522|3.98973e-73|brp:103870348|K09522 DnaJ homolog subfamily C member 2 | (RefSeq) dnaJ homolog subfamily C member 2	[O]	Posttranslational modification, protein turnover, chaperones	DnaJ domain;; Myb-like DNA-binding domain;; Myb-like DNA-binding domain	DNAJ protein JJJ1 homolog OS=Arabidopsis thaliana OX=3702 GN=JJJ1 PE=1 SV=1	K	Transcription	predicted protein [Hordeum vulgare subsp. vulgare]
c1038690.graph_c0	[G]	Carbohydrate transport and metabolism	--	--	--	--	--	--	S	Function unknown	hypothetical protein LY90DRAFT_524796 [Neocallimastix californiae]
c1038728.graph_c0	--	--	Molecular Function: serine-type endopeptidase inhibitor activity (GO:0004867);; Biological Process: response to wounding (GO:0009611);; Biological Process: negative regulation of endopeptidase activity (GO:0010951);;	--	--	--	Potato inhibitor I family	Subtilisin-chymotrypsin inhibitor CI-1A OS=Hordeum vulgare OX=4513 PE=1 SV=1	--	--	RecName: Full=Subtilisin-chymotrypsin inhibitor CI-1A
c1038739.graph_c0	--	--	Biological Process: transcription, DNA-templated (GO:0006351);;	K01527|1.27524e-45|ppp:PHYPADRAFT_199261|K01527 nascent polypeptide-associated complex subunit beta | (RefSeq) hypothetical protein	[K]	Transcription	NAC domain	Basic transcription factor 3 OS=Arabidopsis thaliana OX=3702 GN=BTF3 PE=1 SV=1	K	Transcription	hypothetical protein EMIHUDRAFT_438269 [Emiliania huxleyi CCMP1516]
c1038772.graph_c0	--	--	--	K03094|8.74544e-20|jcu:105647105|K03094 S-phase kinase-associated protein 1 | (RefSeq) SKP1-like protein 1B	[O]	Posttranslational modification, protein turnover, chaperones	Skp1 family, dimerisation domain;; Skp1 family, tetramerisation domain	SKP1-like protein 1A OS=Arabidopsis thaliana OX=3702 GN=SKP1A PE=1 SV=1	O	Posttranslational modification, protein turnover, chaperones	glycoprotein fp21 [Nannochloropsis gaditana]
c1038797.graph_c0	[P]	Inorganic ion transport and metabolism	Biological Process: cellular metabolic process (GO:0044237);;	K04564|1.4743e-46|smo:SELMODRAFT_123324|K04564 superoxide dismutase, Fe-Mn family [EC:1.15.1.1] | (RefSeq) hypothetical protein	[P]	Inorganic ion transport and metabolism	Iron/manganese superoxide dismutases, C-terminal domain;; Iron/manganese superoxide dismutases, alpha-hairpin domain	Superoxide dismutase [Fe] 3, chloroplastic OS=Arabidopsis thaliana OX=3702 GN=FSD3 PE=1 SV=1	P	Inorganic ion transport and metabolism	hypothetical protein PIROE2DRAFT_59464 [Piromyces sp. E2]
c1038801.graph_c0	--	--	--	--	--	--	--	--	O	Posttranslational modification, protein turnover, chaperones	--
c1038823.graph_c0	--	--	Biological Process: mRNA splicing, via spliceosome (GO:0000398);; Cellular Component: P-body (GO:0000932);; Molecular Function: RNA binding (GO:0003723);; Cellular Component: U6 snRNP (GO:0005688);; Cellular Component: nucleolus (GO:0005730);; Cellular Component: small nucleolar ribonucleoprotein complex (GO:0005732);; Cellular Component: cytosol (GO:0005829);; Cellular Component: U4/U6 x U5 tri-…	K12621|2.11165e-40|ath:AT1G03330|K12621 U6 snRNA-associated Sm-like protein LSm2 | (RefSeq) LSM2; Small nuclear ribonucleoprotein family protein	[A]	RNA processing and modification	LSM domain	Sm-like protein LSM2 OS=Arabidopsis thaliana OX=3702 GN=LSM2 PE=1 SV=1	K	Transcription	u6 snRNA-associated sm-like protein lsm2 [Lobosporangium transversale]
c1038863.graph_c0	--	--	--	--	--	--	PH domain	--	T	Signal transduction mechanisms	--
c1038890.graph_c0	[F]	Nucleotide transport and metabolism	Molecular Function: adenine phosphoribosyltransferase activity (GO:0003999);; Cellular Component: cytoplasm (GO:0005737);; Biological Process: adenine salvage (GO:0006168);; Biological Process: nucleoside metabolic process (GO:0009116);;	K00759|2.10886e-43|mus:103975749|K00759 adenine phosphoribosyltransferase [EC:2.4.2.7] | (RefSeq) adenine phosphoribosyltransferase 3-like	[F]	Nucleotide transport and metabolism	Phosphoribosyl transferase domain	Adenine phosphoribosyltransferase 1 OS=Triticum aestivum OX=4565 GN=APT1 PE=2 SV=1	F	Nucleotide transport and metabolism	adenine phosphoribosyltransferase [Obba rivulosa]
c1038919.graph_c0	[B]	Chromatin structure and dynamics	Molecular Function: DNA binding (GO:0003677);;	K15223|7.01283e-20|fve:101301921|K15223 upstream activation factor subunit UAF30 | (RefSeq) upstream activation factor subunit spp27	[K]	Transcription	SWIB/MDM2 domain;; linker histone H1 and H5 family	Histone H1-I OS=Volvox carteri OX=3067 GN=H1-I PE=2 SV=3	B	Chromatin structure and dynamics	swib mdm2 domain protein [Colletotrichum gloeosporioides Nara gc5]
c1038931.graph_c0	[J]	Translation, ribosomal structure and biogenesis	Molecular Function: RNA binding (GO:0003723);; Molecular Function: structural constituent of ribosome (GO:0003735);; Biological Process: translation (GO:0006412);; Cellular Component: chloroplast (GO:0009507);; Cellular Component: cytosolic small ribosomal subunit (GO:0022627);;	K02981|2.47219e-33|ppp:PHYPADRAFT_227152|K02981 small subunit ribosomal protein S2e | (RefSeq) hypothetical protein	[J]	Translation, ribosomal structure and biogenesis	Ribosomal protein S5, N-terminal domain	40S ribosomal protein S2-4 OS=Arabidopsis thaliana OX=3702 GN=RPS2D PE=2 SV=1	J	Translation, ribosomal structure and biogenesis	hypothetical protein CEUSTIGMA_g9333.t1 [Chlamydomonas eustigma]
c1038931.graph_c1	[J]	Translation, ribosomal structure and biogenesis	Molecular Function: RNA binding (GO:0003723);; Molecular Function: structural constituent of ribosome (GO:0003735);; Biological Process: translation (GO:0006412);; Cellular Component: cytosolic small ribosomal subunit (GO:0022627);;	K02981|2.51863e-83|smo:SELMODRAFT_149893|K02981 small subunit ribosomal protein S2e | (RefSeq) hypothetical protein	[J]	Translation, ribosomal structure and biogenesis	Ribosomal protein S5, C-terminal domain;; Ribosomal protein S5, N-terminal domain	40S ribosomal protein S2-2 OS=Arabidopsis thaliana OX=3702 GN=RPS2B PE=2 SV=1	J	Translation, ribosomal structure and biogenesis	hypothetical protein SELMODRAFT_149893 [Selaginella moellendorffii]
c1038932.graph_c0	--	--	Molecular Function: structural constituent of ribosome (GO:0003735);; Biological Process: metabolic process (GO:0008152);; Cellular Component: membrane (GO:0016020);; Cellular Component: cytosolic small ribosomal subunit (GO:0022627);;	K02951|2.07235e-40|bdi:100823604|K02951 small subunit ribosomal protein S12e | (RefSeq) 40S ribosomal protein S12	[J]	Translation, ribosomal structure and biogenesis	Ribosomal protein L7Ae/L30e/S12e/Gadd45 family	40S ribosomal protein S12 OS=Hordeum vulgare OX=4513 GN=RPS12 PE=2 SV=1	J	Translation, ribosomal structure and biogenesis	40S ribosomal protein S12-like [Phalaenopsis equestris]
c1038944.graph_c0	[G]	Carbohydrate transport and metabolism	--	--	[R]	General function prediction only	Major Facilitator Superfamily;; Sugar (and other) transporter	--	G	Carbohydrate transport and metabolism	hypothetical protein CEUSTIGMA_g1743.t1 [Chlamydomonas eustigma]
c1038968.graph_c0	--	--	--	--	--	--	--	--	S	Function unknown	hypothetical protein AMAG_10108 [Allomyces macrogynus ATCC 38327]
c1038984.graph_c0	--	--	--	K02934|5.5414e-56|sly:101250600|K02934 large subunit ribosomal protein L6e | (RefSeq) 60S ribosomal protein L6-like	[J]	Translation, ribosomal structure and biogenesis	Ribosomal protein L6e	60S ribosomal protein L6 OS=Mesembryanthemum crystallinum OX=3544 GN=RPL6 PE=2 SV=1	J	Translation, ribosomal structure and biogenesis	60S ribosomal protein L6 [Coprinopsis cinerea okayama7#130]
c1039049.graph_c0	--	--	--	--	--	--	Sec7 domain	--	--	--	--
c1039051.graph_c0	--	--	Molecular Function: cysteine-type endopeptidase activity (GO:0004197);; Cellular Component: extracellular space (GO:0005615);; Cellular Component: lysosome (GO:0005764);; Biological Process: proteolysis involved in cellular protein catabolic process (GO:0051603);;	--	[O]	Posttranslational modification, protein turnover, chaperones	Cathepsin propeptide inhibitor domain (I29)	Oryzain alpha chain OS=Oryza sativa subsp. japonica OX=39947 GN=Os04g0650000 PE=1 SV=2	O	Posttranslational modification, protein turnover, chaperones	papain-like cysteine protease C1 [Pythium insidiosum]
c1039051.graph_c1	[O]	Posttranslational modification, protein turnover, chaperones	Molecular Function: cysteine-type endopeptidase activity (GO:0004197);; Cellular Component: extracellular space (GO:0005615);; Cellular Component: lysosome (GO:0005764);; Biological Process: proteolysis involved in cellular protein catabolic process (GO:0051603);;	--	[O]	Posttranslational modification, protein turnover, chaperones	Papain family cysteine protease;; Peptidase C1-like family	Ervatamin-B OS=Tabernaemontana divaricata OX=52861 PE=1 SV=1	O	Posttranslational modification, protein turnover, chaperones	Cathepsin cysteine protease [Phytophthora nicotianae]
c1039063.graph_c0	[I]	Lipid transport and metabolism	Biological Process: steroid metabolic process (GO:0008202);; Molecular Function: transferase activity (GO:0016740);;	K00559|3.63582e-102|spen:107008176|K00559 sterol 24-C-methyltransferase [EC:2.1.1.41] | (RefSeq) cycloartenol-C-24-methyltransferase 1	[IR]	--	Sterol methyltransferase C-terminal;; Methyltransferase domain;; Methyltransferase domain;; Methyltransferase domain;; Mycolic acid cyclopropane synthetase;; Methyltransferase domain;; ubiE/COQ5 methyltransferase family	Cycloartenol-C-24-methyltransferase OS=Arabidopsis thaliana OX=3702 GN=SMT1 PE=1 SV=1	S	Function unknown	sterol 24-C-methyltransferase [Rhizophagus irregularis DAOM 197198w]
c1039079.graph_c0	[R]	General function prediction only	--	K06934|2.76875e-40|mpp:MICPUCDRAFT_18240|K06934 uncharacterized protein | (RefSeq) hypothetical protein	--	--	Domain of unknown function (DUF296)	AT-hook motif nuclear-localized protein 5 OS=Arabidopsis thaliana OX=3702 GN=AHL5 PE=1 SV=1	S	Function unknown	predicted protein, partial [Micromonas pusilla CCMP1545]
c1039103.graph_c0	--	--	--	--	[TZ]	--	Formin Homology 2 Domain	Formin-like protein 10 OS=Oryza sativa subsp. japonica OX=39947 GN=FH10 PE=2 SV=1	S	Function unknown	actin-binding FH2 [Hesseltinella vesiculosa]
c1039107.graph_c0	--	--	--	--	--	--	PUB domain	--	O	Posttranslational modification, protein turnover, chaperones	--
c1039135.graph_c0	[K]	Transcription	--	K15731|2.57911e-56|olu:OSTLU_8327|K15731 carboxy-terminal domain RNA polymerase II polypeptide A small phosphatase [EC:3.1.3.16] | (RefSeq) hypothetical protein	[K]	Transcription	NLI interacting factor-like phosphatase	Mitochondrial import inner membrane translocase subunit TIM50 OS=Phytophthora infestans OX=4787 GN=TIM50 PE=2 SV=1	K	Transcription	NIF-domain-containing protein [Conidiobolus coronatus NRRL 28638]
c1039138.graph_c0	--	--	Molecular Function: structural constituent of ribosome (GO:0003735);; Biological Process: translation (GO:0006412);; Cellular Component: cytosolic small ribosomal subunit (GO:0022627);;	K02984|9.54776e-26|vra:106776383|K02984 small subunit ribosomal protein S3Ae | (RefSeq) 40S ribosomal protein S3a	[J]	Translation, ribosomal structure and biogenesis	--	40S ribosomal protein S3a-1 OS=Vitis vinifera OX=29760 GN=GSVIVT00020038001 PE=3 SV=1	J	Translation, ribosomal structure and biogenesis	PREDICTED: 40S ribosomal protein S3a [Vigna angularis]
c1039170.graph_c1	[J]	Translation, ribosomal structure and biogenesis	Biological Process: ribosomal large subunit assembly (GO:0000027);; Molecular Function: structural constituent of ribosome (GO:0003735);; Biological Process: translation (GO:0006412);; Cellular Component: cytosolic large ribosomal subunit (GO:0022625);;	K02925|1.26405e-63|ccp:CHC_T00007885001|K02925 large subunit ribosomal protein L3e | (RefSeq) hypothetical protein	[J]	Translation, ribosomal structure and biogenesis	Ribosomal protein L3	60S ribosomal protein L3 OS=Oryza sativa subsp. japonica OX=39947 GN=RPL3 PE=2 SV=2	J	Translation, ribosomal structure and biogenesis	60S ribosomal protein L3 [Saprolegnia parasitica CBS 223.65]
c1039173.graph_c0	[J]	Translation, ribosomal structure and biogenesis	Molecular Function: RNA binding (GO:0003723);; Molecular Function: structural constituent of ribosome (GO:0003735);; Cellular Component: mitochondrion (GO:0005739);; Biological Process: translation (GO:0006412);; Cellular Component: cytosolic large ribosomal subunit (GO:0022625);; Biological Process: ribosome biogenesis (GO:0042254);;	K02915|5.43811e-26|sita:101776413|K02915 large subunit ribosomal protein L34e | (RefSeq) 60S ribosomal protein L34	[J]	Translation, ribosomal structure and biogenesis	Ribosomal protein L34e	60S ribosomal protein L34 OS=Pisum sativum OX=3888 GN=RPL34 PE=2 SV=1	J	Translation, ribosomal structure and biogenesis	60S ribosomal protein L34 [Aegilops tauschii subsp. tauschii]
c1039203.graph_c0	[G]	Carbohydrate transport and metabolism	Molecular Function: hydrolase activity, hydrolyzing O-glycosyl compounds (GO:0004553);; Cellular Component: extracellular region (GO:0005576);; Biological Process: carbohydrate metabolic process (GO:0005975);; Molecular Function: cellulose binding (GO:0030248);;	--	--	--	Cellulase (glycosyl hydrolase family 5);; Fungal cellulose binding domain	--	G	Carbohydrate transport and metabolism	hypothetical protein RSOLAG22IIIB_10826 [Rhizoctonia solani]
c1039211.graph_c0	[C]	Energy production and conversion	Molecular Function: citrate (Si)-synthase activity (GO:0004108);; Cellular Component: mitochondrion (GO:0005739);; Biological Process: tricarboxylic acid cycle (GO:0006099);;	K01647|9.98225e-166|smo:SELMODRAFT_228235|K01647 citrate synthase [EC:2.3.3.1] | (RefSeq) hypothetical protein	[C]	Energy production and conversion	Citrate synthase, C-terminal domain	Citrate synthase, mitochondrial OS=Daucus carota OX=4039 GN=CS PE=2 SV=1	C	Energy production and conversion	citrate synthase [Basidiobolus meristosporus CBS 931.73]
c1039219.graph_c0	[O]	Posttranslational modification, protein turnover, chaperones	Molecular Function: oxidoreductase activity (GO:0016491);; Cellular Component: cytoplasmic part (GO:0044444);;	K03676|6.10533e-23|fve:101300837|K03676 glutaredoxin 3 | (RefSeq) glutaredoxin	[O]	Posttranslational modification, protein turnover, chaperones	Glutaredoxin;; Glutathione S-transferase, N-terminal domain	Glutaredoxin-C2 OS=Arabidopsis thaliana OX=3702 GN=GRXC2 PE=3 SV=1	O	Posttranslational modification, protein turnover, chaperones	hypothetical protein CHGG_07435 [Chaetomium globosum CBS 148.51]
c1039273.graph_c0	[Z]	Cytoskeleton	Cellular Component: dynactin complex (GO:0005869);;	--	[Z]	Cytoskeleton	Actin	Actin-11 OS=Arabidopsis thaliana OX=3702 GN=ACT11 PE=1 SV=1	Z	Cytoskeleton	Putative Actin-related protein [Rhizopus microsporus]
c1039278.graph_c0	--	--	--	--	--	--	Translationally controlled tumour protein	--	--	--	--
c1039283.graph_c1	[J]	Translation, ribosomal structure and biogenesis	Biological Process: ribosomal small subunit assembly (GO:0000028);; Biological Process: maturation of SSU-rRNA from tricistronic rRNA transcript (SSU-rRNA, 5.8S rRNA, LSU-rRNA) (GO:0000462);; Molecular Function: structural constituent of ribosome (GO:0003735);; Cellular Component: nucleus (GO:0005634);; Biological Process: translation (GO:0006412);; Cellular Component: cytosolic small ribosomal s…	K02949|4.78559e-46|gsl:Gasu_61400|K02949 small subunit ribosomal protein S11e | (RefSeq) 40S ribosomal protein S11e	[J]	Translation, ribosomal structure and biogenesis	Ribosomal protein S17;; Ribosomal_S17 N-terminal	40S ribosomal protein S11 OS=Glycine max OX=3847 GN=RPS11 PE=2 SV=2	J	Translation, ribosomal structure and biogenesis	40S ribosomal protein S11 [Lachancea thermotolerans CBS 6340]
c1039315.graph_c0	--	--	--	--	[T]	Signal transduction mechanisms	SH2 domain	--	--	--	--
c1039351.graph_c0	[O]	Posttranslational modification, protein turnover, chaperones	Biological Process: cellular process (GO:0009987);;	--	[O]	Posttranslational modification, protein turnover, chaperones	Thioredoxin	Protein disulfide-isomerase OS=Datisca glomerata OX=34297 GN=PDI PE=2 SV=1	O	Posttranslational modification, protein turnover, chaperones	hypothetical protein GUITHDRAFT_84522 [Guillardia theta CCMP2712]
c1039355.graph_c0	[R]	General function prediction only	--	--	--	--	Bacterial transferase hexapeptide (six repeats);; Hexapeptide repeat of succinyl-transferase	Gamma carbonic anhydrase 1, mitochondrial OS=Arabidopsis thaliana OX=3702 GN=GAMMACA1 PE=1 SV=1	S	Function unknown	unnamed protein product [Coffea canephora]
c1039391.graph_c0	[R]	General function prediction only	Biological Process: actin filament organization (GO:0007015);; Cellular Component: intracellular part (GO:0044424);;	K05757|2.14711e-81|ppp:PHYPADRAFT_160291|K05757 actin related protein 2/3 complex, subunit 1A/1B | (RefSeq) hypothetical protein	[Z]	Cytoskeleton	Anaphase-promoting complex subunit 4 WD40 domain;; WD domain, G-beta repeat	Actin-related protein 2/3 complex subunit 1A OS=Arabidopsis thaliana OX=3702 GN=ARPC1A PE=2 SV=1	S	Function unknown	actin-like protein ARPC3 [Basidiobolus meristosporus CBS 931.73]
c1039397.graph_c0	--	--	--	--	[C]	Energy production and conversion	ATP synthase D chain, mitochondrial (ATP5H)	--	S	Function unknown	hypothetical protein M427DRAFT_432265 [Gonapodya prolifera JEL478]
c1039398.graph_c0	[T]	Signal transduction mechanisms	Molecular Function: cysteine synthase activity (GO:0004124);; Cellular Component: cytoplasm (GO:0005737);; Biological Process: cysteine biosynthetic process from serine (GO:0006535);; Molecular Function: pyridoxal phosphate binding (GO:0030170);;	K01697|3.2803e-107|gsl:Gasu_21070|K01697 cystathionine beta-synthase [EC:4.2.1.22] | (RefSeq) cystathionine beta-synthase	[E]	Amino acid transport and metabolism	CBS domain	Cysteine synthase OS=Oryza sativa subsp. japonica OX=39947 GN=RCS3 PE=2 SV=1	E	Amino acid transport and metabolism	cystathionine beta-synthase [Aphanomyces astaci]
c1039435.graph_c0	--	--	--	--	--	--	Cystatin domain	--	S	Function unknown	cystatin b [Nannochloropsis gaditana]
c1039514.graph_c0	[O]	Posttranslational modification, protein turnover, chaperones	--	K13984|2.32764e-17|cre:CHLREDRAFT_185378|K13984 thioredoxin domain-containing protein 5 | (RefSeq) PDI3; protein disulfide isomerase	[O]	Posttranslational modification, protein turnover, chaperones	Thioredoxin	Probable protein disulfide-isomerase A6 OS=Medicago sativa OX=3879 PE=2 SV=1	O	Posttranslational modification, protein turnover, chaperones	Protein disulfide-isomerase domain [Phytophthora megakarya]
c1039602.graph_c2	[O]	Posttranslational modification, protein turnover, chaperones	Molecular Function: DNA replication origin binding (GO:0003688);; Molecular Function: single-stranded DNA binding (GO:0003697);; Molecular Function: ATP binding (GO:0005524);; Cellular Component: mitochondrial intermembrane space (GO:0005758);; Biological Process: 'de novo' protein folding (GO:0006458);; Molecular Function: ATPase activity (GO:0016887);; Cellular Component: mitochondrial membrane…	K04077|5.6089e-45|gsl:Gasu_12870|K04077 chaperonin GroEL | (RefSeq) chaperonin GroEL	[O]	Posttranslational modification, protein turnover, chaperones	TCP-1/cpn60 chaperonin family	Chaperonin CPN60-1, mitochondrial OS=Zea mays OX=4577 GN=CPN60I PE=1 SV=2	O	Posttranslational modification, protein turnover, chaperones	hypothetical protein MUCCIDRAFT_179015 [Mucor circinelloides f. lusitanicus CBS 277.49]
c1039636.graph_c0	--	--	--	--	[O]	Posttranslational modification, protein turnover, chaperones	Ubiquitin carboxyl-terminal hydrolase	--	O	Posttranslational modification, protein turnover, chaperones	PREDICTED: uncharacterized protein LOC108999205 isoform X1 [Juglans regia]
c1039656.graph_c0	[J]	Translation, ribosomal structure and biogenesis	Molecular Function: nucleotide binding (GO:0000166);; Biological Process: formation of translation preinitiation complex (GO:0001731);; Molecular Function: translation initiation factor activity (GO:0003743);; Cellular Component: eukaryotic translation initiation factor 3 complex (GO:0005852);; Biological Process: regulation of translational initiation (GO:0006446);; Cellular Component: eukaryoti…	K03248|3.0431e-63|tcc:TCM_042695|K03248 translation initiation factor 3 subunit G | (RefSeq) Eukaryotic translation initiation factor 3G1	[J]	Translation, ribosomal structure and biogenesis	Eukaryotic translation initiation factor 3 subunit G;; RNA recognition motif. (a.k.a. RRM, RBD, or RNP domain)	Serine/arginine-rich SC35-like splicing factor SCL30A OS=Arabidopsis thaliana OX=3702 GN=SCL30A PE=1 SV=1	J	Translation, ribosomal structure and biogenesis	eukaryotic translation initiation factor 3 subunit G, putative [Pythium insidiosum]
c1039672.graph_c0	--	--	--	--	--	--	--	--	--	--	mucunain [Mucuna pruriens]
c1039675.graph_c0	--	--	Biological Process: organelle organization (GO:0006996);; Biological Process: primary metabolic process (GO:0044238);; Biological Process: cellular macromolecule metabolic process (GO:0044260);; Biological Process: single-organism cellular process (GO:0044763);;	K14012|9.10392e-51|mtr:MTR_5g085870|K14012 UBX domain-containing protein 1 | (RefSeq) UBA and UBX domain plant protein	[Y]	Nuclear structure	SEP domain;; UBX domain;; UBA-like domain	Plant UBX domain-containing protein 5 OS=Arabidopsis thaliana OX=3702 GN=PUX5 PE=1 SV=1	O	Posttranslational modification, protein turnover, chaperones	SEP-domain-containing protein [Rhizophagus irregularis]
c1039694.graph_c1	[L]	Replication, recombination and repair	Cellular Component: intracellular part (GO:0044424);;	K18655|7.38544e-62|bna:106452440|K18655 ATP-dependent RNA helicase DDX19/DBP5 [EC:3.6.4.13] | (RefSeq) DEAD-box ATP-dependent RNA helicase 38-like	[A]	RNA processing and modification	DEAD/DEAH box helicase;; Helicase conserved C-terminal domain;; Type III restriction enzyme, res subunit	DEAD-box ATP-dependent RNA helicase 38 OS=Arabidopsis thaliana OX=3702 GN=RH38 PE=1 SV=2	L	Replication, recombination and repair	ATP-dependent RNA helicase DBP5 [Wolfiporia cocos MD-104 SS10]
c1039707.graph_c0	--	--	Molecular Function: isomerase activity (GO:0016853);;	--	--	--	--	--	--	--	putative peptidyl-prolyl isomerase D (cyclophilin D) [Rhizoctonia solani 123E]
c1039736.graph_c0	[O]	Posttranslational modification, protein turnover, chaperones	Molecular Function: hydrolase activity (GO:0016787);;	--	[E]	Amino acid transport and metabolism	Trypsin;; Domain of unknown function (DUF1986)	--	O	Posttranslational modification, protein turnover, chaperones	serine-type endopeptidase [Ascochyta rabiei]
c1039750.graph_c0	[F]	Nucleotide transport and metabolism	Biological Process: deoxyribonucleoside diphosphate metabolic process (GO:0009186);; Cellular Component: integral component of membrane (GO:0016021);; Molecular Function: oxidoreductase activity (GO:0016491);; Biological Process: oxidation-reduction process (GO:0055114);;	K10808|1.13896e-165|thj:104805326|K10808 ribonucleoside-diphosphate reductase subunit M2 [EC:1.17.4.1] | (RefSeq) ribonucleoside-diphosphate reductase small chain C-like	[F]	Nucleotide transport and metabolism	Ribonucleotide reductase, small chain	Ribonucleoside-diphosphate reductase small chain B OS=Arabidopsis thaliana OX=3702 GN=RNR2B PE=2 SV=1	F	Nucleotide transport and metabolism	hypothetical protein CERSUDRAFT_111206 [Gelatoporia subvermispora B]
c1039806.graph_c0	--	--	--	--	--	--	EF-hand domain;; EF hand	--	--	--	--
c1039825.graph_c0	[S]	Function unknown	Cellular Component: integral component of membrane (GO:0016021);;	--	--	--	MAPEG family	--	S	Function unknown	hypothetical protein RirG_180120 [Rhizophagus irregularis DAOM 197198w]
c1039851.graph_c0	[R]	General function prediction only	Biological Process: cellular response to nitrogen starvation (GO:0006995);; Biological Process: signal transduction (GO:0007165);; Biological Process: pathogenesis (GO:0009405);; Biological Process: arginine transport (GO:0015809);; Cellular Component: membrane (GO:0016020);; Molecular Function: purine ribonucleoside binding (GO:0032550);; Molecular Function: guanyl ribonucleotide binding (GO:003…	K07208|2.04528e-41|gsl:Gasu_37740|K07208 Ras homolog enriched in brain | (RefSeq) small GTP-binding protein of Ras family	[R]	General function prediction only	Ras family;; Ras of Complex, Roc, domain of DAPkinase;; ADP-ribosylation factor family	Ras-related protein RABE1c OS=Arabidopsis thaliana OX=3702 GN=RABE1C PE=1 SV=1	S	Function unknown	rheb gtpase rhb1 [Malassezia pachydermatis]
c1039852.graph_c0	--	--	Biological Process: ribosomal small subunit assembly (GO:0000028);; Molecular Function: structural constituent of ribosome (GO:0003735);; Cellular Component: cytosolic small ribosomal subunit (GO:0022627);;	K02947|1.36395e-36|bpg:Bathy01g00920|K02947 small subunit ribosomal protein S10e | (RefSeq) hypothetical protein	[J]	Translation, ribosomal structure and biogenesis	Plectin/S10 domain	40S ribosomal protein S10-2 OS=Oryza sativa subsp. japonica OX=39947 GN=RPS10-2 PE=2 SV=1	J	Translation, ribosomal structure and biogenesis	hypothetical protein PHYSODRAFT_286426 [Phytophthora sojae]
c1039868.graph_c0	[I]	Lipid transport and metabolism	--	--	[I]	Lipid transport and metabolism	Fatty acid desaturase;; Cytochrome b5-like Heme/Steroid binding domain	Acyl-lipid (9-3)-desaturase OS=Ceratodon purpureus OX=3225 PE=1 SV=1	I	Lipid transport and metabolism	delta-6 fatty acid desaturase [Nannochloropsis gaditana]
c1039930.graph_c0	[T]	Signal transduction mechanisms	Molecular Function: nucleotide binding (GO:0000166);; Molecular Function: protein serine/threonine kinase activity (GO:0004674);; Cellular Component: nucleus (GO:0005634);; Cellular Component: cytoplasm (GO:0005737);; Biological Process: phosphorylation (GO:0016310);; Biological Process: intracellular signal transduction (GO:0035556);;	K13303|1.43604e-136|gsl:Gasu_13570|K13303 serum/glucocorticoid-regulated kinase 2 [EC:2.7.11.1] | (RefSeq) serine/threonine protein kinase	[RT]	--	Protein kinase domain;; Protein tyrosine kinase	Serine/threonine-protein kinase AtPK2/AtPK19 OS=Arabidopsis thaliana OX=3702 GN=ATPK2 PE=1 SV=2	T	Signal transduction mechanisms	predicted protein [Hordeum vulgare subsp. vulgare]
c1039974.graph_c0	[J]	Translation, ribosomal structure and biogenesis	Biological Process: ribosomal large subunit assembly (GO:0000027);; Molecular Function: DNA binding (GO:0003677);; Molecular Function: structural constituent of ribosome (GO:0003735);; Biological Process: regulation of transcription, DNA-templated (GO:0006355);; Biological Process: translational termination (GO:0006415);; Cellular Component: cytosolic large ribosomal subunit (GO:0022625);;	K02866|3.91559e-71|sita:101781976|K02866 large subunit ribosomal protein L10e | (RefSeq) 60S ribosomal protein L10	[J]	Translation, ribosomal structure and biogenesis	Ribosomal protein L16p/L10e	60S ribosomal protein L10-1 OS=Oryza sativa subsp. japonica OX=39947 GN=SC34 PE=2 SV=1	J	Translation, ribosomal structure and biogenesis	probable RPL10-60S large subunit ribosomal protein L10 [Serendipita indica DSM 11827]
c1040068.graph_c0	[R]	General function prediction only	Molecular Function: GTP binding (GO:0005525);; Cellular Component: intracellular (GO:0005622);; Cellular Component: plasma membrane (GO:0005886);; Biological Process: small GTPase mediated signal transduction (GO:0007264);; Biological Process: protein transport (GO:0015031);;	K07877|1.84843e-113|cre:CHLREDRAFT_148836|K07877 Ras-related protein Rab-2A | (RefSeq) RABB1; small rab-related GTPase	[U]	Intracellular trafficking, secretion, and vesicular transport	Ras family;; Ras of Complex, Roc, domain of DAPkinase;; ADP-ribosylation factor family;; 50S ribosome-binding GTPase;; Gtr1/RagA G protein conserved region	GTP-binding protein YPTC4 OS=Chlamydomonas reinhardtii OX=3055 GN=YPTC4 PE=3 SV=1	S	Function unknown	Rab2A, RAB family GTPase [Ectocarpus siliculosus]
c1040201.graph_c0	[GR]	--	--	K17623|1.28683e-59|adu:107472086|K17623 pseudouridine 5'-phosphatase [EC:3.1.3.96] | (RefSeq) (DL)-glycerol-3-phosphatase 2-like	[R]	General function prediction only	Haloacid dehalogenase-like hydrolase;; haloacid dehalogenase-like hydrolase	(DL)-glycerol-3-phosphatase 2 OS=Arabidopsis thaliana OX=3702 GN=GPP2 PE=1 SV=1	S	Function unknown	hypothetical protein RO3G_01579 [Rhizopus delemar RA 99-880]
c1040217.graph_c0	--	--	--	--	--	--	--	--	S	Function unknown	--
c1040272.graph_c0	[D]	Cell cycle control, cell division, chromosome partitioning	--	K06694|3.22772e-22|spen:107018857|K06694 26S proteasome non-ATPase regulatory subunit 10 | (RefSeq) 26S proteasome non-ATPase regulatory subunit 10	[M]	Cell wall/membrane/envelope biogenesis	Ankyrin repeat;; Ankyrin repeats (3 copies);; Ankyrin repeats (many copies);; Ankyrin repeats (many copies);; Ankyrin repeat	Ankyrin repeat domain-containing protein, chloroplastic OS=Arabidopsis thaliana OX=3702 GN=AKRP PE=1 SV=2	S	Function unknown	uncharacterized protein ARMOST_02826 [Armillaria ostoyae]
c1040272.graph_c1	[T]	Signal transduction mechanisms	Molecular Function: kinase activity (GO:0016301);;	--	[T]	Signal transduction mechanisms	Protein kinase domain;; Protein tyrosine kinase	MAP3K epsilon protein kinase 1 OS=Arabidopsis thaliana OX=3702 GN=M3KE1 PE=1 SV=1	T	Signal transduction mechanisms	hypothetical protein CRG98_040435 [Punica granatum]
c1040311.graph_c0	[E]	Amino acid transport and metabolism	Cellular Component: membrane (GO:0016020);; Molecular Function: oxidoreductase activity (GO:0016491);; Biological Process: single-organism metabolic process (GO:0044710);;	K00273|1.45337e-49|cvr:CHLNCDRAFT_144079|K00273 D-amino-acid oxidase [EC:1.4.3.3] | (RefSeq) hypothetical protein	[E]	Amino acid transport and metabolism	FAD dependent oxidoreductase;; FAD binding domain	--	E	Amino acid transport and metabolism	hypothetical protein PHYSODRAFT_319218 [Phytophthora sojae]
c1040367.graph_c0	--	--	Molecular Function: protein domain specific binding (GO:0019904);;	K06630|2.13757e-51|eus:EUTSA_v10028882mg|K06630 14-3-3 protein epsilon | (RefSeq) hypothetical protein	[O]	Posttranslational modification, protein turnover, chaperones	14-3-3 protein	14-3-3-like protein GF14 omega OS=Arabidopsis thaliana OX=3702 GN=GRF2 PE=2 SV=2	T	Signal transduction mechanisms	14-3-3-like protein [Manihot esculenta]
c1040374.graph_c0	--	--	--	--	[R]	General function prediction only	C2 domain	Elicitor-responsive protein 3 OS=Oryza sativa subsp. japonica OX=39947 GN=ERG3 PE=1 SV=1	S	Function unknown	predicted protein, partial [Chlamydomonas reinhardtii]
c1040415.graph_c0	--	--	Molecular Function: protein transporter activity (GO:0008565);; Biological Process: protein transport (GO:0015031);;	K11827|4.28902e-73|olu:OSTLU_40610|K11827 AP-2 complex subunit sigma-1 | (RefSeq) hypothetical protein	[U]	Intracellular trafficking, secretion, and vesicular transport	Clathrin adaptor complex small chain	AP-2 complex subunit sigma OS=Arabidopsis thaliana OX=3702 GN=AP17 PE=2 SV=1	U	Intracellular trafficking, secretion, and vesicular transport	predicted protein [Ostreococcus lucimarinus CCE9901]
c1040458.graph_c0	[J]	Translation, ribosomal structure and biogenesis	Cellular Component: intracellular (GO:0005622);;	K02914|4.96134e-11|ppp:PHYPADRAFT_166110|K02914 large subunit ribosomal protein L34 | (RefSeq) hypothetical protein	[J]	Translation, ribosomal structure and biogenesis	Ribosomal protein L34	50S ribosomal protein L34, chloroplastic OS=Guillardia theta OX=55529 GN=rpl34 PE=3 SV=1	J	Translation, ribosomal structure and biogenesis	predicted protein [Physcomitrella patens]
c1040463.graph_c0	[R]	General function prediction only	Biological Process: metabolic process (GO:0008152);; Molecular Function: acetyltransferase activity (GO:0016407);;	--	--	--	Phosphate acetyl/butaryl transferase;; AAA domain;; DRTGG domain	--	C	Energy production and conversion	phosphate acetyltransferase [Pythium insidiosum]
c1040485.graph_c0	--	--	--	K17398|1.57148e-10|mdm:103433929|K17398 DNA (cytosine-5)-methyltransferase 3A [EC:2.1.1.37] | (RefSeq) uncharacterized LOC103433929	--	--	PWWP domain	--	S	Function unknown	putative PWWP domain-containing protein [Helianthus annuus]
c1040544.graph_c0	--	--	--	--	--	--	CotH kinase protein	--	--	--	hypothetical protein RMATCC62417_07396 [Rhizopus microsporus]
c1040556.graph_c0	--	--	--	--	[Z]	Cytoskeleton	Cofilin/tropomyosin-type actin-binding protein	--	S	Function unknown	hypothetical protein L203_05246 [Cryptococcus depauperatus CBS 7841]
c1040559.graph_c0	--	--	Molecular Function: ATP binding (GO:0005524);;	K03283|4.19989e-28|obr:102714815|K03283 heat shock 70kDa protein 1/8 | (RefSeq) probable mediator of RNA polymerase II transcription subunit 37c	[O]	Posttranslational modification, protein turnover, chaperones	Hsp70 protein	Heat shock 70 kDa protein OS=Zea mays OX=4577 GN=HSP70 PE=3 SV=2	O	Posttranslational modification, protein turnover, chaperones	Heat shock 70 kDa protein [Zea mays]
c1040567.graph_c0	--	--	--	--	--	--	Protein of unknown function (DUF3712)	--	--	--	hypothetical protein F442_09971, partial [Phytophthora parasitica P10297]
c1040589.graph_c0	--	--	Molecular Function: peroxidase activity (GO:0004601);; Biological Process: response to oxidative stress (GO:0006979);; Cellular Component: integral component of membrane (GO:0016021);; Molecular Function: heme binding (GO:0020037);; Biological Process: oxidation-reduction process (GO:0055114);; Biological Process: cellular oxidant detoxification (GO:0098869);;	K00434|1.26928e-40|cic:CICLE_v10028990mg|K00434 L-ascorbate peroxidase [EC:1.11.1.11] | (RefSeq) hypothetical protein	--	--	Peroxidase	Probable L-ascorbate peroxidase 4, peroxisomal OS=Oryza sativa subsp. japonica OX=39947 GN=APX4 PE=2 SV=1	P	Inorganic ion transport and metabolism	PREDICTED: L-ascorbate peroxidase 3, peroxisomal-like [Juglans regia]
c1040613.graph_c0	[O]	Posttranslational modification, protein turnover, chaperones	--	--	[O]	Posttranslational modification, protein turnover, chaperones	Papain family cysteine protease;; Cathepsin propeptide inhibitor domain (I29);; Peptidase C1-like family	Senescence-specific cysteine protease SAG39 OS=Oryza sativa subsp. japonica OX=39947 GN=SAG39 PE=2 SV=2	O	Posttranslational modification, protein turnover, chaperones	cysteine protease 1 [Noctiluca scintillans]
c1040642.graph_c1	--	--	--	K15542|1.10363e-06|smo:SELMODRAFT_51909|K15542 polyadenylation factor subunit 2 | (RefSeq) FY-2; hypothetical protein	[Z]	Cytoskeleton	Domain of unknown function (DUF1899);; Type of WD40 repeat;; Anaphase-promoting complex subunit 4 WD40 domain	--	S	Function unknown	hypothetical protein H257_03713 [Aphanomyces astaci]
c1040701.graph_c0	--	--	Molecular Function: hydrolase activity (GO:0016787);;	K01373|2.3327e-10|pvu:PHAVU_001G009900g|K01373 cathepsin F [EC:3.4.22.41] | (RefSeq) hypothetical protein	[O]	Posttranslational modification, protein turnover, chaperones	Cathepsin propeptide inhibitor domain (I29)	Oryzain alpha chain OS=Oryza sativa subsp. japonica OX=39947 GN=Os04g0650000 PE=1 SV=2	O	Posttranslational modification, protein turnover, chaperones	predicted protein [Hordeum vulgare subsp. vulgare]
c1040723.graph_c0	--	--	--	--	--	--	AAA domain	--	--	--	--
c1040749.graph_c1	[J]	Translation, ribosomal structure and biogenesis	Molecular Function: structural constituent of ribosome (GO:0003735);; Biological Process: translation (GO:0006412);; Cellular Component: cytosolic large ribosomal subunit (GO:0022625);;	K02885|1.02816e-54|cre:CHLREDRAFT_195590|K02885 large subunit ribosomal protein L19e | (RefSeq) RPL19; ribosomal protein L19, component of cytosolic 80S ribosome and 60S large subunit	[J]	Translation, ribosomal structure and biogenesis	Ribosomal protein L19e	60S ribosomal protein L19-2 OS=Arabidopsis thaliana OX=3702 GN=RPL19B PE=2 SV=1	J	Translation, ribosomal structure and biogenesis	hypothetical protein GPECTOR_198g349 [Gonium pectorale]
c1040788.graph_c0	--	--	--	K11878|2.24703e-07|cmo:103490859|K11878 proteasome assembly chaperone 4 | (RefSeq) proteasome assembly chaperone 4	--	--	Selenoprotein SelK_SelG	--	S	Function unknown	hypothetical protein K493DRAFT_320766 [Basidiobolus meristosporus CBS 931.73]
c1040790.graph_c0	[J]	Translation, ribosomal structure and biogenesis	--	K02896|1.426e-17|fve:101300104|K02896 large subunit ribosomal protein L24e | (RefSeq) 60S ribosomal protein L24-like	[J]	Translation, ribosomal structure and biogenesis	Ribosomal protein L24e	60S ribosomal protein L24-2 OS=Arabidopsis thaliana OX=3702 GN=RPL24B PE=1 SV=2	J	Translation, ribosomal structure and biogenesis	ribosomal protein L24e-domain-containing protein [Leucosporidium creatinivorum]
c1040863.graph_c0	--	--	--	--	--	--	--	--	--	--	conserved unknown protein [Ectocarpus siliculosus]
c1040887.graph_c0	--	--	--	--	--	--	--	--	--	--	Putative transcription elongation factor SPT5 isogeny 1 [Cajanus cajan]
c1040896.graph_c0	[K]	Transcription	Molecular Function: transferase activity (GO:0016740);;	--	--	--	Leucine rich repeat;; Leucine Rich repeats (2 copies);; Leucine rich repeat N-terminal domain;; Leucine Rich Repeat	Probable leucine-rich repeat receptor-like protein kinase IMK3 OS=Arabidopsis thaliana OX=3702 GN=IMK3 PE=1 SV=1	S	Function unknown	MDIS1-interacting receptor like kinase 2-like [Jatropha curcas]
c1040913.graph_c0	[J]	Translation, ribosomal structure and biogenesis	Molecular Function: binding (GO:0005488);;	K12885|7.9496e-13|bdi:100823909|K12885 heterogeneous nuclear ribonucleoprotein G | (RefSeq) glycine-rich RNA-binding protein RZ1C-like	[R]	General function prediction only	RNA recognition motif. (a.k.a. RRM, RBD, or RNP domain)	Glycine-rich RNA-binding protein 4, mitochondrial OS=Arabidopsis thaliana OX=3702 GN=RBG4 PE=2 SV=1	S	Function unknown	PREDICTED: glycine-rich RNA-binding protein RZ1C-like [Brachypodium distachyon]
c1040913.graph_c1	[I]	Lipid transport and metabolism	Molecular Function: fatty-acyl-CoA binding (GO:0000062);; Molecular Function: acyl-CoA dehydrogenase activity (GO:0003995);; Molecular Function: electron carrier activity (GO:0009055);; Biological Process: fatty acid beta-oxidation using acyl-CoA dehydrogenase (GO:0033539);; Molecular Function: flavin adenine dinucleotide binding (GO:0050660);; Molecular Function: oxidoreductase activity, acting …	K00249|1.91376e-149|sbi:SORBI_02g042770|K00249 acyl-CoA dehydrogenase [EC:1.3.8.7] | (RefSeq) SORBIDRAFT_02g042770, Sb02g042770; hypothetical protein	[R]	General function prediction only	RNA recognition motif. (a.k.a. RRM, RBD, or RNP domain)	Probable acyl-CoA dehydrogenase IBR3 OS=Arabidopsis thaliana OX=3702 GN=IBR3 PE=1 SV=1	--	--	acyl-CoA dehydrogenase domain protein [Basidiobolus meristosporus CBS 931.73]
c1040954.graph_c0	[R]	General function prediction only	Molecular Function: catalytic activity (GO:0003824);;	--	[R]	General function prediction only	Phenazine biosynthesis-like protein;; Acetyltransferase (GNAT) family;; Acetyltransferase (GNAT) domain;; Acetyltransferase (GNAT) domain	--	S	Function unknown	hypothetical protein PHYSODRAFT_485869 [Phytophthora sojae]
c1041081.graph_c0	--	--	Biological Process: metabolic process (GO:0008152);; Molecular Function: hydrolase activity (GO:0016787);;	--	[V]	Defense mechanisms	alpha/beta hydrolase fold	2-hydroxyisoflavanone dehydratase OS=Glycyrrhiza echinata OX=46348 GN=HIDM PE=1 SV=1	I	Lipid transport and metabolism	2-hydroxyisoflavanone dehydratase-like protein [Glycine max]
c1041088.graph_c0	[J]	Translation, ribosomal structure and biogenesis	--	--	[S]	Function unknown	Helix-turn-helix;; Multiprotein bridging factor 1;; Helix-turn-helix domain	Multiprotein-bridging factor 1a OS=Arabidopsis thaliana OX=3702 GN=MBF1A PE=2 SV=1	S	Function unknown	PREDICTED: transmembrane and coiled-coil domain-containing protein 1-like [Nicotiana sylvestris]
c1041124.graph_c0	--	--	--	--	--	--	--	--	--	--	hypothetical protein GPECTOR_20g577 [Gonium pectorale]
c1041153.graph_c0	[R]	General function prediction only	Biological Process: autophagy (GO:0006914);; Cellular Component: membrane (GO:0016020);; Cellular Component: intracellular part (GO:0044424);;	--	[S]	Function unknown	--	Autophagy-related protein 18d OS=Arabidopsis thaliana OX=3702 GN=ATG18D PE=2 SV=1	S	Function unknown	predicted protein, partial [Ostreococcus lucimarinus CCE9901]
c1041160.graph_c0	--	--	--	--	--	--	Protein of unknown function (DUF4197)	--	S	Function unknown	--
c1041175.graph_c0	--	--	--	--	[S]	Function unknown	--	Protein SPIRRIG OS=Arabidopsis thaliana OX=3702 GN=SPI PE=1 SV=1	S	Function unknown	hypothetical protein TSUD_402890 [Trifolium subterraneum]
c1041199.graph_c0	[R]	General function prediction only	--	--	--	--	--	--	S	Function unknown	--
c1041237.graph_c0	--	--	Molecular Function: nucleic acid binding (GO:0003676);; Biological Process: translation (GO:0006412);; Cellular Component: macromolecular complex (GO:0032991);; Cellular Component: cytoplasmic part (GO:0044444);;	K03253|1.80762e-169|rcu:8274147|K03253 translation initiation factor 3 subunit B | (RefSeq) eukaryotic translation initiation factor 3 subunit B	[J]	Translation, ribosomal structure and biogenesis	Eukaryotic translation initiation factor eIF2A;; Anaphase-promoting complex subunit 4 WD40 domain;; RNA recognition motif. (a.k.a. RRM, RBD, or RNP domain)	Eukaryotic translation initiation factor 3 subunit B OS=Arabidopsis thaliana OX=3702 GN=TIF3B1 PE=1 SV=1	J	Translation, ribosomal structure and biogenesis	PREDICTED: eukaryotic translation initiation factor 3 subunit B [Ricinus communis]
c1041322.graph_c0	--	--	--	--	[R]	General function prediction only	Zinc finger, C2H2 type	Probable lysine-specific demethylase ELF6 OS=Arabidopsis thaliana OX=3702 GN=ELF6 PE=1 SV=1	S	Function unknown	Zinc finger protein [Tetrabaena socialis]
c1041323.graph_c0	[T]	Signal transduction mechanisms	Molecular Function: protein serine/threonine kinase activity (GO:0004674);; Molecular Function: ATP binding (GO:0005524);; Biological Process: protein phosphorylation (GO:0006468);;	--	[T]	Signal transduction mechanisms	Protein kinase domain;; Protein tyrosine kinase;; Kinase-like	Serine/threonine-protein kinase AtPK2/AtPK19 OS=Arabidopsis thaliana OX=3702 GN=ATPK2 PE=1 SV=2	T	Signal transduction mechanisms	Pkinase-domain-containing protein [Basidiobolus meristosporus CBS 931.73]
c1041343.graph_c0	[R]	General function prediction only	Cellular Component: Golgi membrane (GO:0000139);; Molecular Function: GTP binding (GO:0005525);; Cellular Component: endoplasmic reticulum membrane (GO:0005789);; Cellular Component: plasma membrane (GO:0005886);; Biological Process: ER to Golgi vesicle-mediated transport (GO:0006888);; Biological Process: small GTPase mediated signal transduction (GO:0007264);; Biological Process: protein transp…	K07874|2.35779e-83|smo:SELMODRAFT_177231|K07874 Ras-related protein Rab-1A | (RefSeq) Rab1b-2; rab family GTPase	[TU]	--	Ras family;; Ras of Complex, Roc, domain of DAPkinase;; ADP-ribosylation factor family	GTP-binding protein YPTC1 OS=Chlamydomonas reinhardtii OX=3055 GN=YPTC1 PE=3 SV=1	S	Function unknown	unknown [Picea sitchensis]
c1041380.graph_c0	--	--	--	K20642|7.99068e-14|mis:MICPUN_60751|K20642 Rho GTPase-activating protein 22/24/25 | (RefSeq) hypothetical protein	[T]	Signal transduction mechanisms	RhoGAP domain;; SH3 domain;; Variant SH3 domain;; Variant SH3 domain;; PH domain	Rho GTPase-activating protein 3 OS=Arabidopsis thaliana OX=3702 GN=ROPGAP3 PE=2 SV=1	S	Function unknown	hypothetical protein HMPREF1544_00776 [Mucor circinelloides f. circinelloides 1006PhL]
c1041394.graph_c0	--	--	--	--	--	--	DOMON domain	--	--	--	--
c1041396.graph_c0	--	--	--	K17279|2.5601e-24|mis:MICPUN_109513|K17279 receptor expression-enhancing protein 5/6 | (RefSeq) hypothetical protein	[U]	Intracellular trafficking, secretion, and vesicular transport	TB2/DP1, HVA22 family	HVA22-like protein k OS=Arabidopsis thaliana OX=3702 GN=HVA22K PE=2 SV=1	U	Intracellular trafficking, secretion, and vesicular transport	hypothetical protein MVEG_05096 [Mortierella verticillata NRRL 6337]
c1041397.graph_c0	[J]	Translation, ribosomal structure and biogenesis	Cellular Component: intracellular (GO:0005622);;	K02966|1.97899e-45|smo:SELMODRAFT_153225|K02966 small subunit ribosomal protein S19e | (RefSeq) hypothetical protein	[J]	Translation, ribosomal structure and biogenesis	Ribosomal protein S19e	40S ribosomal protein S19-3 OS=Arabidopsis thaliana OX=3702 GN=RPS19C PE=2 SV=1	J	Translation, ribosomal structure and biogenesis	hypothetical protein BU14_0524s0001 [Porphyra umbilicalis]
c1041432.graph_c0	--	--	Molecular Function: protein domain specific binding (GO:0019904);;	K06630|1.81449e-86|ppp:PHYPADRAFT_189801|K06630 14-3-3 protein epsilon | (RefSeq) hypothetical protein	[O]	Posttranslational modification, protein turnover, chaperones	14-3-3 protein	14-3-3-like protein OS=Solanum tuberosum OX=4113 PE=2 SV=1	T	Signal transduction mechanisms	predicted protein [Hordeum vulgare subsp. vulgare]
c1041432.graph_c1	--	--	Molecular Function: protein domain specific binding (GO:0019904);;	K06630|2.5012e-33|gsl:Gasu_35850|K06630 14-3-3 protein epsilon | (RefSeq) 14-3-3 protein-like protein	[O]	Posttranslational modification, protein turnover, chaperones	14-3-3 protein	14-3-3-like protein OS=Helianthus annuus OX=4232 PE=2 SV=1	T	Signal transduction mechanisms	14-3-3 protein-like protein [Galdieria sulphuraria]
c1041463.graph_c0	[J]	Translation, ribosomal structure and biogenesis	Molecular Function: structural constituent of ribosome (GO:0003735);; Biological Process: translation (GO:0006412);; Cellular Component: cytosolic large ribosomal subunit (GO:0022625);;	K02912|3.08263e-42|ppp:PHYPADRAFT_212907|K02912 large subunit ribosomal protein L32e | (RefSeq) hypothetical protein	[J]	Translation, ribosomal structure and biogenesis	Ribosomal protein L32	60S ribosomal protein L32-1 OS=Arabidopsis thaliana OX=3702 GN=RPL32A PE=2 SV=2	J	Translation, ribosomal structure and biogenesis	60S ribosomal protein L32-1 [Pythium insidiosum]
c1041468.graph_c0	[J]	Translation, ribosomal structure and biogenesis	Cellular Component: ribosome (GO:0005840);;	K02872|6.19355e-68|vcn:VOLCADRAFT_75696|K02872 large subunit ribosomal protein L13Ae | (RefSeq) rpl13A; component of cytosolic 80S ribosome and 60S large subunit	[J]	Translation, ribosomal structure and biogenesis	Ribosomal protein L13	60S ribosomal protein L13a OS=Cyanophora paradoxa OX=2762 PE=2 SV=1	J	Translation, ribosomal structure and biogenesis	RecName: Full=60S ribosomal protein L13a
c1041498.graph_c0	--	--	Biological Process: cytoplasmic translation (GO:0002181);; Molecular Function: structural constituent of ribosome (GO:0003735);; Cellular Component: cytosolic large ribosomal subunit (GO:0022625);; Biological Process: ribosomal large subunit biogenesis (GO:0042273);;	K02917|6.90171e-39|tcc:TCM_042616|K02917 large subunit ribosomal protein L35Ae | (RefSeq) Ribosomal protein L35Ae family protein isoform 1	[J]	Translation, ribosomal structure and biogenesis	Ribosomal protein L35Ae	60S ribosomal protein L35a-2 OS=Arabidopsis thaliana OX=3702 GN=RPL35AB PE=3 SV=1	J	Translation, ribosomal structure and biogenesis	ribosomal 60S subunit protein L33A [Rhizophagus irregularis DAOM 197198w]
c1041538.graph_c0	--	--	--	--	--	--	--	--	I	Lipid transport and metabolism	F1-ATPase delta subunit [Schizosaccharomyces cryophilus OY26]
c1041548.graph_c0	[J]	Translation, ribosomal structure and biogenesis	Molecular Function: RNA binding (GO:0003723);; Molecular Function: structural constituent of ribosome (GO:0003735);; Biological Process: translation (GO:0006412);; Cellular Component: cytosolic large ribosomal subunit (GO:0022625);; Biological Process: ribosome biogenesis (GO:0042254);;	K02915|1.14118e-40|egu:105058315|K02915 large subunit ribosomal protein L34e | (RefSeq) 60S ribosomal protein L34	[J]	Translation, ribosomal structure and biogenesis	Ribosomal protein L34e	60S ribosomal protein L34 OS=Nicotiana tabacum OX=4097 GN=RPL34 PE=2 SV=1	J	Translation, ribosomal structure and biogenesis	60S ribosomal protein L34, partial [Rhizopus microsporus ATCC 52813]
c1041558.graph_c0	[F]	Nucleotide transport and metabolism	Molecular Function: nucleoside diphosphate kinase activity (GO:0004550);; Molecular Function: ATP binding (GO:0005524);; Cellular Component: intracellular (GO:0005622);; Biological Process: nucleoside diphosphate phosphorylation (GO:0006165);; Biological Process: GTP biosynthetic process (GO:0006183);; Biological Process: UTP biosynthetic process (GO:0006228);; Biological Process: CTP biosyntheti…	K00940|2.30236e-66|smo:SELMODRAFT_228272|K00940 nucleoside-diphosphate kinase [EC:2.7.4.6] | (RefSeq) NDPK3-2; hypothetical protein	[F]	Nucleotide transport and metabolism	Nucleoside diphosphate kinase	Nucleoside diphosphate kinase IV, chloroplastic/mitochondrial OS=Arabidopsis thaliana OX=3702 GN=NDK4 PE=1 SV=2	F	Nucleotide transport and metabolism	hypothetical protein AM588_10002655 [Phytophthora nicotianae]
c1041583.graph_c0	--	--	Cellular Component: cytosol (GO:0005829);; Cellular Component: ribosome (GO:0005840);; Biological Process: translation (GO:0006412);;	K02943|1.04434e-08|fve:101305460|K02943 large subunit ribosomal protein LP2 | (RefSeq) 60S acidic ribosomal protein P2-4-like	[J]	Translation, ribosomal structure and biogenesis	60s Acidic ribosomal protein	60S acidic ribosomal protein P2B OS=Zea mays OX=4577 GN=RPP2B PE=1 SV=1	J	Translation, ribosomal structure and biogenesis	hypothetical protein M407DRAFT_245966 [Tulasnella calospora MUT 4182]
c1041594.graph_c0	--	--	Cellular Component: cytosol (GO:0005829);; Cellular Component: ribosome (GO:0005840);; Biological Process: translation (GO:0006412);; Cellular Component: intracellular organelle part (GO:0044446);;	K02934|2.7056e-50|zma:100191612|K02934 large subunit ribosomal protein L6e | (RefSeq) pco112591, GRMZM2G008748; uncharacterized LOC100191612	[J]	Translation, ribosomal structure and biogenesis	Ribosomal protein L6e	60S ribosomal protein L6 OS=Mesembryanthemum crystallinum OX=3544 GN=RPL6 PE=2 SV=1	J	Translation, ribosomal structure and biogenesis	60s ribosomal protein l6 [Chrysochromulina sp. CCMP291]
c1041603.graph_c0	--	--	Cellular Component: cytoplasm (GO:0005737);; Biological Process: vesicle-mediated transport (GO:0016192);; Biological Process: intracellular transport (GO:0046907);;	K17917|1.30379e-31|smo:SELMODRAFT_108542|K17917 sorting nexin-1/2 | (RefSeq) hypothetical protein	[U]	Intracellular trafficking, secretion, and vesicular transport	Vps5 C terminal like;; PX domain	Sorting nexin 1 OS=Arabidopsis thaliana OX=3702 GN=SNX1 PE=1 SV=1	U	Intracellular trafficking, secretion, and vesicular transport	Vps5-domain-containing protein, partial [Rhizopus microsporus]
c1041722.graph_c0	--	--	--	K15109|3.77084e-38|ccp:CHC_T00009209001|K15109 solute carrier family 25 (mitochondrial carnitine/acylcarnitine transporter), member 20/29 | (RefSeq) Putative carnitine/acylcarnitine translocase	[C]	Energy production and conversion	Mitochondrial carrier protein	Mitochondrial carnitine/acylcarnitine carrier-like protein OS=Arabidopsis thaliana OX=3702 GN=BOU PE=1 SV=1	S	Function unknown	mitochondrial carrier [Coemansia reversa NRRL 1564]
c1041733.graph_c0	--	--	--	K14410|1.228e-10|ccp:CHC_T00002031001|K14410 lysosomal acid phosphatase [EC:3.1.3.2] | (RefSeq) hypothetical protein	[I]	Lipid transport and metabolism	Histidine phosphatase superfamily (branch 2)	--	S	Function unknown	histidine phosphatase superfamily [Lobosporangium transversale]
c1041794.graph_c0	--	--	--	K01052|4.97552e-86|cvr:CHLNCDRAFT_35098|K01052 lysosomal acid lipase/cholesteryl ester hydrolase [EC:3.1.1.13] | (RefSeq) hypothetical protein	[I]	Lipid transport and metabolism	Partial alpha/beta-hydrolase lipase region;; alpha/beta hydrolase fold;; Serine aminopeptidase, S33	Triacylglycerol lipase 2 OS=Arabidopsis thaliana OX=3702 GN=LIP2 PE=2 SV=1	S	Function unknown	hypothetical protein L917_09209 [Phytophthora parasitica]
c1041800.graph_c0	[D]	Cell cycle control, cell division, chromosome partitioning	--	--	--	--	Protein of unknown function (DUF1565)	--	S	Function unknown	hypothetical protein GUITHDRAFT_105461 [Guillardia theta CCMP2712]
c1041808.graph_c0	[J]	Translation, ribosomal structure and biogenesis	--	K11129|4.70259e-21|vra:106775396|K11129 H/ACA ribonucleoprotein complex subunit 2 | (RefSeq) H/ACA ribonucleoprotein complex subunit 2-like protein	[A]	RNA processing and modification	Ribosomal protein L7Ae/L30e/S12e/Gadd45 family;; RNase P subunit Pop3	H/ACA ribonucleoprotein complex subunit 2-like protein OS=Arabidopsis thaliana OX=3702 GN=At5g08180 PE=1 SV=1	J	Translation, ribosomal structure and biogenesis	box H/ACA snoRNP component Nhp2p [Guillardia theta CCMP2712]
c1041836.graph_c0	--	--	Cellular Component: membrane (GO:0016020);;	K17278|6.3878e-27|apro:F751_2833|K17278 membrane-associated progesterone receptor component | (RefSeq) putative steroid-binding protein 3	[R]	General function prediction only	Cytochrome b5-like Heme/Steroid binding domain	Probable steroid-binding protein 3 OS=Arabidopsis thaliana OX=3702 GN=MP3 PE=1 SV=1	S	Function unknown	hypothetical protein HETIRDRAFT_46209 [Heterobasidion irregulare TC 32-1]
c1041897.graph_c1	[J]	Translation, ribosomal structure and biogenesis	Biological Process: maturation of SSU-rRNA from tricistronic rRNA transcript (SSU-rRNA, 5.8S rRNA, LSU-rRNA) (GO:0000462);; Cellular Component: cytosolic small ribosomal subunit (GO:0022627);;	K02974|2.77964e-34|zma:542641|K02974 small subunit ribosomal protein S24e | (RefSeq) pco066882(728), GRMZM2G151252; 40S ribosomal protein S24	[J]	Translation, ribosomal structure and biogenesis	Ribosomal protein S24e	40S ribosomal protein S24-2 OS=Arabidopsis thaliana OX=3702 GN=RPS24B PE=2 SV=2	J	Translation, ribosomal structure and biogenesis	uncharacterized protein LOC542641 [Zea mays]
c1041967.graph_c0	--	--	--	--	--	--	Hypoxia induced protein conserved region	--	S	Function unknown	hypothetical protein BOTBODRAFT_183773 [Botryobasidium botryosum FD-172 SS1]
c1041968.graph_c0	[V]	Defense mechanisms	Molecular Function: kinase activity (GO:0016301);; Biological Process: phosphorylation (GO:0016310);; Molecular Function: peroxiredoxin activity (GO:0051920);; Biological Process: oxidation-reduction process (GO:0055114);; Biological Process: cellular oxidant detoxification (GO:0098869);;	--	[O]	Posttranslational modification, protein turnover, chaperones	AhpC/TSA family;; Redoxin;; C-terminal domain of 1-Cys peroxiredoxin	Probable 1-Cys peroxiredoxin OS=Tortula ruralis OX=38588 PE=2 SV=1	--	--	peroxiredoxin, PRX3 [Chondrus crispus]
c1041984.graph_c0	--	--	--	K18668|2.69744e-17|gsl:Gasu_34000|K18668 ribonuclease ZC3H12 [EC:3.1.-.-] | (RefSeq) hypothetical protein	[S]	Function unknown	Zc3h12a-like Ribonuclease NYN domain;; Zc3h12a-like Ribonuclease NYN domain;; Protein-only RNase P	--	S	Function unknown	hypothetical protein SDRG_08764 [Saprolegnia diclina VS20]
c1042008.graph_c0	--	--	Biological Process: transport (GO:0006810);; Cellular Component: membrane (GO:0016020);;	--	[R]	General function prediction only	Protein of unknown function (DUF2370)	--	U	Intracellular trafficking, secretion, and vesicular transport	hypothetical protein RhiirA4_313472 [Rhizophagus irregularis]
c1042034.graph_c0	[P]	Inorganic ion transport and metabolism	Cellular Component: fungal-type vacuole (GO:0000324);; Biological Process: cation transport (GO:0006812);; Biological Process: cellular zinc ion homeostasis (GO:0006882);; Molecular Function: cation transmembrane transporter activity (GO:0008324);; Biological Process: response to metal ion (GO:0010038);; Cellular Component: membrane (GO:0016020);; Biological Process: transmembrane transport (GO:0…	K14689|2.19946e-19|gsl:Gasu_23180|K14689 solute carrier family 30 (zinc transporter), member 2 | (RefSeq) cation efflux system protein, CDF family	[P]	Inorganic ion transport and metabolism	Cation efflux family	Metal tolerance protein 8 OS=Oryza sativa subsp. japonica OX=39947 GN=MTP8 PE=2 SV=2	P	Inorganic ion transport and metabolism	cation efflux protein [Basidiobolus meristosporus CBS 931.73]
c1042049.graph_c0	--	--	--	--	[A]	RNA processing and modification	RNA recognition motif. (a.k.a. RRM, RBD, or RNP domain);; RNA recognition motif. (a.k.a. RRM, RBD, or RNP domain);; Occluded RNA-recognition motif	Polypyrimidine tract-binding protein homolog 3 OS=Arabidopsis thaliana OX=3702 GN=At1g43190 PE=2 SV=1	S	Function unknown	PREDICTED: polypyrimidine tract-binding protein homolog 3-like [Solanum tuberosum]
c1042057.graph_c0	--	--	--	K01052|1.38877e-51|spen:107019773|K01052 lysosomal acid lipase/cholesteryl ester hydrolase [EC:3.1.1.13] | (RefSeq) triacylglycerol lipase 2-like	[I]	Lipid transport and metabolism	--	Triacylglycerol lipase 2 OS=Arabidopsis thaliana OX=3702 GN=LIP2 PE=2 SV=1	S	Function unknown	PREDICTED: triacylglycerol lipase 2-like [Daucus carota subsp. sativus]
c1042065.graph_c0	[O]	Posttranslational modification, protein turnover, chaperones	--	K11416|4.47095e-65|cit:102607534|K11416 mono-ADP-ribosyltransferase sirtuin 6 [EC:2.4.2.31] | (RefSeq) NAD-dependent protein deacetylase SRT1	[BK]	--	Sir2 family	NAD-dependent protein deacetylase SRT1 OS=Arabidopsis thaliana OX=3702 GN=SRT1 PE=2 SV=1	K	Transcription	PREDICTED: NAD-dependent protein deacetylase SRT1 [Citrus sinensis]
c1042066.graph_c0	--	--	Molecular Function: GTP binding (GO:0005525);; Cellular Component: intracellular (GO:0005622);; Biological Process: small GTPase mediated signal transduction (GO:0007264);;	K04392|4.00587e-42|bdi:100832255|K04392 Ras-related C3 botulinum toxin substrate 1 | (RefSeq) rac-like GTP-binding protein 7	[R]	General function prediction only	Ras family;; Ras of Complex, Roc, domain of DAPkinase	Rac-like GTP-binding protein 7 OS=Oryza sativa subsp. japonica OX=39947 GN=RAC7 PE=2 SV=1	S	Function unknown	hypothetical protein BOTBODRAFT_27364 [Botryobasidium botryosum FD-172 SS1]
c1042095.graph_c0	[C]	Energy production and conversion	Biological Process: metabolic process (GO:0008152);; Molecular Function: oxidoreductase activity (GO:0016491);;	K00161|1.03111e-31|pvu:PHAVU_003G056300g|K00161 pyruvate dehydrogenase E1 component alpha subunit [EC:1.2.4.1] | (RefSeq) hypothetical protein	[C]	Energy production and conversion	Dehydrogenase E1 component	Pyruvate dehydrogenase E1 component subunit alpha-1, mitochondrial OS=Arabidopsis thaliana OX=3702 GN=E1 ALPHA PE=1 SV=2	C	Energy production and conversion	Pyruvate dehydrogenase E1 component subunit alpha-1, mitochondrial [Dendrobium catenatum]
c1042095.graph_c1	[C]	Energy production and conversion	Molecular Function: oxidoreductase activity, acting on the aldehyde or oxo group of donors, disulfide as acceptor (GO:0016624);; Biological Process: single-organism metabolic process (GO:0044710);; Molecular Function: metal ion binding (GO:0046872);;	K00161|1.61214e-80|ccp:CHC_T00008732001|K00161 pyruvate dehydrogenase E1 component alpha subunit [EC:1.2.4.1] | (RefSeq) pyruvate dehydrogenase E1 alpha subunit, mitochondrial precursor	[C]	Energy production and conversion	BP28CT (NUC211) domain	Pyruvate dehydrogenase E1 component subunit alpha-2, mitochondrial OS=Oryza sativa subsp. japonica OX=39947 GN=Os06g0246500 PE=2 SV=1	C	Energy production and conversion	pyruvate dehydrogenase E1 alpha subunit, mitochondrial precursor [Chondrus crispus]
c1042098.graph_c0	--	--	Molecular Function: GTP binding (GO:0005525);; Cellular Component: intracellular (GO:0005622);; Biological Process: small GTPase mediated signal transduction (GO:0007264);;	K07937|2.22837e-18|pda:103711950|K07937 ADP-ribosylation factor 1 | (RefSeq) ADP-ribosylation factor 2-like	[U]	Intracellular trafficking, secretion, and vesicular transport	ADP-ribosylation factor family	ADP-ribosylation factor OS=Zea mays OX=4577 GN=ARF1 PE=2 SV=2	S	Function unknown	ADP-ribosylation factor family [Phytophthora palmivora var. palmivora]
c1042124.graph_c0	--	--	Molecular Function: threonine-type endopeptidase activity (GO:0004298);; Cellular Component: nucleus (GO:0005634);; Cellular Component: cytoplasm (GO:0005737);; Cellular Component: proteasome core complex (GO:0005839);; Biological Process: proteolysis involved in cellular protein catabolic process (GO:0051603);;	--	--	--	--	--	O	Posttranslational modification, protein turnover, chaperones	proteasome subunit beta type-7, putative [Pythium insidiosum]
c1042124.graph_c1	[O]	Posttranslational modification, protein turnover, chaperones	Molecular Function: threonine-type endopeptidase activity (GO:0004298);; Cellular Component: nucleus (GO:0005634);; Cellular Component: cytoplasm (GO:0005737);; Cellular Component: proteasome core complex (GO:0005839);; Biological Process: proteolysis involved in cellular protein catabolic process (GO:0051603);;	K02739|7.65472e-104|gsl:Gasu_37470|K02739 20S proteasome subunit beta 2 [EC:3.4.25.1] | (RefSeq) 20S proteasome subunit beta 2	[O]	Posttranslational modification, protein turnover, chaperones	Proteasome subunit	Proteasome subunit beta type-7-B OS=Arabidopsis thaliana OX=3702 GN=PBB2 PE=1 SV=2	O	Posttranslational modification, protein turnover, chaperones	hypothetical protein PPTG_16154 [Phytophthora parasitica INRA-310]
c1042188.graph_c0	[J]	Translation, ribosomal structure and biogenesis	Molecular Function: structural constituent of ribosome (GO:0003735);; Biological Process: rRNA processing (GO:0006364);; Biological Process: translation (GO:0006412);; Cellular Component: cytosolic large ribosomal subunit (GO:0022625);; Molecular Function: pre-mRNA 5'-splice site binding (GO:0030627);; Biological Process: negative regulation of mRNA splicing, via spliceosome (GO:0048025);;	K02908|3.18798e-51|ppp:PHYPADRAFT_213651|K02908 large subunit ribosomal protein L30e | (RefSeq) hypothetical protein	[J]	Translation, ribosomal structure and biogenesis	Ribosomal protein L7Ae/L30e/S12e/Gadd45 family	60S ribosomal protein L30 OS=Lupinus luteus OX=3873 GN=RPL30 PE=3 SV=1	J	Translation, ribosomal structure and biogenesis	60S ribosomal protein L30-like protein [Piromyces finnis]
c1042197.graph_c0	--	--	Cellular Component: ribosome (GO:0005840);; Biological Process: translation (GO:0006412);;	K02891|4.16794e-14|egu:105052526|K02891 large subunit ribosomal protein L22e | (RefSeq) 60S ribosomal protein L22-2	[J]	Translation, ribosomal structure and biogenesis	Ribosomal L22e protein family	60S ribosomal protein L22-2 OS=Arabidopsis thaliana OX=3702 GN=RPL22B PE=2 SV=1	J	Translation, ribosomal structure and biogenesis	hypothetical protein PHYSODRAFT_353368 [Phytophthora sojae]
c1042208.graph_c0	[IQR]	--	--	--	--	--	KR domain;; short chain dehydrogenase	--	S	Function unknown	hypothetical protein RirG_030840 [Rhizophagus irregularis DAOM 197198w]
c1042253.graph_c0	[O]	Posttranslational modification, protein turnover, chaperones	Molecular Function: cysteine-type endopeptidase activity (GO:0004197);; Cellular Component: extracellular space (GO:0005615);; Cellular Component: lysosome (GO:0005764);; Biological Process: proteolysis involved in cellular protein catabolic process (GO:0051603);;	K16292|3.66411e-63|sbi:SORBI_05g021550|K16292 KDEL-tailed cysteine endopeptidase [EC:3.4.22.-] | (RefSeq) SORBIDRAFT_05g021550, Sb05g021550; hypothetical protein	[O]	Posttranslational modification, protein turnover, chaperones	Papain family cysteine protease	Probable cysteine protease RD21C OS=Arabidopsis thaliana OX=3702 GN=RD21C PE=1 SV=1	O	Posttranslational modification, protein turnover, chaperones	putative cysteine protease [Pythium insidiosum]
c1042261.graph_c0	--	--	--	--	[S]	Function unknown	--	--	S	Function unknown	hypothetical protein RHOBADRAFT_65039 [Rhodotorula graminis WP1]
c1042272.graph_c0	[OJ]	--	Cellular Component: nucleus (GO:0005634);; Cellular Component: cytosol (GO:0005829);; Biological Process: peptidyl-lysine modification to peptidyl-hypusine (GO:0008612);; Molecular Function: deoxyhypusine synthase activity (GO:0034038);;	K00809|5.71305e-151|cvr:CHLNCDRAFT_19955|K00809 deoxyhypusine synthase [EC:2.5.1.46] | (RefSeq) hypothetical protein	[O]	Posttranslational modification, protein turnover, chaperones	Deoxyhypusine synthase	Deoxyhypusine synthase OS=Senecio vernalis OX=93496 GN=DHS1 PE=2 SV=1	O	Posttranslational modification, protein turnover, chaperones	deoxyhypusine synthase [Spizellomyces punctatus DAOM BR117]
c1042277.graph_c0	--	--	--	--	[U]	Intracellular trafficking, secretion, and vesicular transport	Clathrin light chain	--	U	Intracellular trafficking, secretion, and vesicular transport	PREDICTED: clathrin light chain-like, partial [Beta vulgaris subsp. vulgaris]
c1042322.graph_c0	--	--	--	K07466|2.73805e-23|thj:104814227|K07466 replication factor A1 | (RefSeq) uncharacterized protein At4g28440-like	--	--	--	Uncharacterized protein At4g28440 OS=Arabidopsis thaliana OX=3702 GN=At4g28440 PE=1 SV=1	S	Function unknown	PREDICTED: uncharacterized protein At4g28440-like [Daucus carota subsp. sativus]
c1042345.graph_c0	[G]	Carbohydrate transport and metabolism	--	--	[C]	Energy production and conversion	Phosphoenolpyruvate phosphomutase	Carboxyvinyl-carboxyphosphonate phosphorylmutase, chloroplastic OS=Arabidopsis thaliana OX=3702 GN=At1g77060 PE=1 SV=2	G	Carbohydrate transport and metabolism	putative phosphoenolpyruvate mutase [Aspergillus ochraceoroseus IBT 24754]
c1042443.graph_c0	--	--	--	K08246|1.13932e-57|cre:CHLREDRAFT_193038|K08246 cycloeucalenol cycloisomerase [EC:5.5.1.9] | (RefSeq) CPI1; cyclopropyl isomerase-like protein	--	--	--	Cycloeucalenol cycloisomerase OS=Arabidopsis thaliana OX=3702 GN=CPI1 PE=2 SV=1	I	Lipid transport and metabolism	cyclopropyl isomerase-like protein [Chlamydomonas reinhardtii]
c1042471.graph_c0	--	--	Molecular Function: sugar:proton symporter activity (GO:0005351);; Molecular Function: glucose transmembrane transporter activity (GO:0005355);; Cellular Component: integral component of plasma membrane (GO:0005887);; Biological Process: hexose transmembrane transport (GO:0035428);; Biological Process: glucose import (GO:0046323);;	--	[R]	General function prediction only	--	Monosaccharide-sensing protein 3 OS=Arabidopsis thaliana OX=3702 GN=MSSP3 PE=2 SV=1	G	Carbohydrate transport and metabolism	monosaccharide-sensing protein 2-like, partial [Trifolium pratense]
c1042473.graph_c0	[O]	Posttranslational modification, protein turnover, chaperones	Cellular Component: cytoplasm (GO:0005737);; Biological Process: cellular process (GO:0009987);; Molecular Function: disulfide oxidoreductase activity (GO:0015036);; Biological Process: single-organism metabolic process (GO:0044710);;	K03671|1.15731e-22|apro:F751_2346|K03671 thioredoxin 1 | (RefSeq) Thioredoxin H-type	[O]	Posttranslational modification, protein turnover, chaperones	Thioredoxin;; Thioredoxin-like;; Thioredoxin-like domain	Thioredoxin H-type OS=Oryza sativa subsp. indica OX=39946 GN=TRXH PE=1 SV=1	O	Posttranslational modification, protein turnover, chaperones	hypothetical protein CDD80_5093 [Ophiocordyceps camponoti-rufipedis]
c1042475.graph_c0	--	--	Biological Process: ribosomal small subunit assembly (GO:0000028);; Molecular Function: structural constituent of ribosome (GO:0003735);; Cellular Component: cytosolic small ribosomal subunit (GO:0022627);;	K02947|2.47617e-35|ppp:PHYPADRAFT_173229|K02947 small subunit ribosomal protein S10e | (RefSeq) hypothetical protein	[J]	Translation, ribosomal structure and biogenesis	Plectin/S10 domain	40S ribosomal protein S10-2 OS=Oryza sativa subsp. japonica OX=39947 GN=RPS10-2 PE=2 SV=1	J	Translation, ribosomal structure and biogenesis	40S ribosomal protein S10 [Pythium insidiosum]
c1042478.graph_c0	--	--	Cellular Component: intracellular part (GO:0044424);;	--	[DZ]	--	Translationally controlled tumour protein	Translationally-controlled tumor protein homolog OS=Zea mays OX=4577 GN=TCTP PE=2 SV=1	S	Function unknown	hypothetical protein BATDEDRAFT_19187 [Batrachochytrium dendrobatidis JAM81]
c1042516.graph_c0	--	--	--	K02265|3.91681e-17|cme:CYME_CML098C|K02265 cytochrome c oxidase subunit 5b | (RefSeq) cytochrome c oxidase subunit Vb	[C]	Energy production and conversion	Cytochrome c oxidase subunit Vb;; Zinc-finger domain	Cytochrome c oxidase subunit 5b-2, mitochondrial OS=Arabidopsis thaliana OX=3702 GN=COX5B-2 PE=1 SV=1	O	Posttranslational modification, protein turnover, chaperones	cytochrome c oxidase subunit 5b-1, mitochondrial-like isoform X2 [Chenopodium quinoa]
c1042615.graph_c2	[C]	Energy production and conversion	Molecular Function: cytochrome-c oxidase activity (GO:0004129);; Molecular Function: iron ion binding (GO:0005506);; Molecular Function: copper ion binding (GO:0005507);; Cellular Component: mitochondrial inner membrane (GO:0005743);; Cellular Component: plasma membrane (GO:0005886);; Biological Process: oxidative phosphorylation (GO:0006119);; Biological Process: aerobic respiration (GO:0009060)…	K02256|2.39368e-32|cvr:OJ20_p01|K02256 cytochrome c oxidase subunit 1 [EC:1.9.3.1] | (RefSeq) cox1; cytochrome c oxidase subunit 1	[C]	Energy production and conversion	--	Cytochrome c oxidase subunit 1 OS=Pisum sativum OX=3888 GN=COX1 PE=3 SV=2	C	Energy production and conversion	cytochrome oxidase subunit I, partial (mitochondrion) [Vaucheria sessilis]
c1042615.graph_c3	[C]	Energy production and conversion	Molecular Function: cytochrome-c oxidase activity (GO:0004129);; Molecular Function: iron ion binding (GO:0005506);; Molecular Function: copper ion binding (GO:0005507);; Cellular Component: mitochondrial inner membrane (GO:0005743);; Cellular Component: plasma membrane (GO:0005886);; Biological Process: oxidative phosphorylation (GO:0006119);; Biological Process: aerobic respiration (GO:0009060)…	K02256|4.89751e-94|osa:6450122|K02256 cytochrome c oxidase subunit 1 [EC:1.9.3.1] | (RefSeq) cox1, OrsajM_p47; cytochrome c oxidase subunit1	[C]	Energy production and conversion	--	Cytochrome c oxidase subunit 1 OS=Marchantia polymorpha OX=3197 GN=COX1 PE=3 SV=2	C	Energy production and conversion	cytochrome oxidase subunit 1, partial (mitochondrion) [Globba sessiliflora]
c1042671.graph_c0	[J]	Translation, ribosomal structure and biogenesis	Cellular Component: ribosome (GO:0005840);;	K02896|2.40228e-20|ccp:CHC_T00010216001|K02896 large subunit ribosomal protein L24e | (RefSeq) ribosomal protein L24	[J]	Translation, ribosomal structure and biogenesis	Ribosomal protein L24e	60S ribosomal protein L24-2 OS=Arabidopsis thaliana OX=3702 GN=RPL24B PE=1 SV=2	J	Translation, ribosomal structure and biogenesis	hypothetical protein AMAG_08547 [Allomyces macrogynus ATCC 38327]
c1042674.graph_c0	--	--	Cellular Component: intracellular (GO:0005622);; Biological Process: transport (GO:0006810);;	--	[U]	Intracellular trafficking, secretion, and vesicular transport	Nuclear transport factor 2 (NTF2) domain	Nuclear transport factor 2B OS=Arabidopsis thaliana OX=3702 GN=NTF2B PE=1 SV=1	U	Intracellular trafficking, secretion, and vesicular transport	nuclear transport factor, putative [Phytophthora infestans T30-4]
c1042733.graph_c0	--	--	Molecular Function: actin binding (GO:0003779);; Cellular Component: actin cytoskeleton (GO:0015629);; Biological Process: actin filament depolymerization (GO:0030042);;	K05765|1.88268e-29|pvu:PHAVU_007G070500g|K05765 cofilin | (RefSeq) hypothetical protein	[Z]	Cytoskeleton	Cofilin/tropomyosin-type actin-binding protein	Actin-depolymerizing factor 7 OS=Arabidopsis thaliana OX=3702 GN=ADF7 PE=2 SV=1	S	Function unknown	hypothetical protein SPPG_08324 [Spizellomyces punctatus DAOM BR117]
c1042786.graph_c0	--	--	Cellular Component: membrane (GO:0016020);;	--	--	--	--	--	--	--	hypothetical protein F443_18927 [Phytophthora parasitica P1569]
c1042816.graph_c0	--	--	Cellular Component: intracellular (GO:0005622);;	--	[Z]	Cytoskeleton	Tropomyosin like;; Tropomyosin	--	Z	Cytoskeleton	hypothetical protein ASPACDRAFT_74833 [Aspergillus aculeatus ATCC 16872]
c1042842.graph_c0	[J]	Translation, ribosomal structure and biogenesis	Biological Process: maturation of LSU-rRNA from tricistronic rRNA transcript (SSU-rRNA, 5.8S rRNA, LSU-rRNA) (GO:0000463);; Molecular Function: mRNA binding (GO:0003729);; Molecular Function: structural constituent of ribosome (GO:0003735);; Biological Process: translation (GO:0006412);; Cellular Component: cytosolic large ribosomal subunit (GO:0022625);;	K02918|7.57404e-37|bna:106388959|K02918 large subunit ribosomal protein L35e | (RefSeq) 60S ribosomal protein L35-1-like	[J]	Translation, ribosomal structure and biogenesis	Ribosomal L29 protein	60S ribosomal protein L35 OS=Euphorbia esula OX=3993 GN=RPL35 PE=2 SV=1	J	Translation, ribosomal structure and biogenesis	hypothetical protein AURANDRAFT_34777 [Aureococcus anophagefferens]
c1042857.graph_c0	--	--	Molecular Function: structural constituent of ribosome (GO:0003735);; Biological Process: translation (GO:0006412);; Cellular Component: cytosolic large ribosomal subunit (GO:0022625);;	K02901|4.73281e-29|bvg:104884826|K02901 large subunit ribosomal protein L27e | (RefSeq) 60S ribosomal protein L27-3-like	[J]	Translation, ribosomal structure and biogenesis	Ribosomal L27e protein family;; KOW motif	60S ribosomal protein L27 OS=Solanum tuberosum OX=4113 GN=RPL27 PE=2 SV=1	J	Translation, ribosomal structure and biogenesis	60S ribosomal protein L27-3-like [Spinacia oleracea]
c1042872.graph_c0	--	--	Cellular Component: intracellular (GO:0005622);; Biological Process: vacuolar transport (GO:0007034);;	K12194|5.25544e-25|bdi:100823924|K12194 charged multivesicular body protein 4 | (RefSeq) vacuolar protein sorting-associated protein 32 homolog 2	[U]	Intracellular trafficking, secretion, and vesicular transport	Snf7	Vacuolar protein sorting-associated protein 32 homolog 1 OS=Arabidopsis thaliana OX=3702 GN=VPS32.1 PE=1 SV=1	U	Intracellular trafficking, secretion, and vesicular transport	hypothetical protein BSLG_07512, partial [Batrachochytrium salamandrivorans]
c1042884.graph_c0	--	--	--	--	--	--	--	--	--	--	CRN-like protein [Plasmopara halstedii]
c1042901.graph_c0	--	--	--	--	--	--	Saposin-like type B, region 1;; Saposin-like type B, region 2	--	O	Posttranslational modification, protein turnover, chaperones	hypothetical protein GPECTOR_69g440 [Gonium pectorale]
c1043098.graph_c0	[J]	Translation, ribosomal structure and biogenesis	Molecular Function: RNA binding (GO:0003723);; Cellular Component: intracellular ribonucleoprotein complex (GO:0030529);;	K02922|1.23327e-28|gsl:Gasu_50890|K02922 large subunit ribosomal protein L37e | (RefSeq) 60S ribosomal protein L37e	[J]	Translation, ribosomal structure and biogenesis	Ribosomal protein L37e	60S ribosomal protein L37-2 OS=Arabidopsis thaliana OX=3702 GN=RPL37B PE=3 SV=2	J	Translation, ribosomal structure and biogenesis	60S ribosomal protein L37e [Galdieria sulphuraria]
c1043108.graph_c0	--	--	--	K18183|5.84759e-21|mis:MICPUN_59737|K18183 cytochrome c oxidase assembly protein subunit 19 | (RefSeq) hypothetical protein	[C]	Energy production and conversion	--	--	O	Posttranslational modification, protein turnover, chaperones	hypothetical protein ACHHYP_11141 [Achlya hypogyna]
c1043203.graph_c0	--	--	--	--	--	--	NADH-ubiquinone reductase complex 1 MLRQ subunit	--	U	Intracellular trafficking, secretion, and vesicular transport	hypothetical protein RO3G_10026 [Rhizopus delemar RA 99-880]
c1043206.graph_c0	--	--	--	--	--	--	--	CLAVATA3/ESR (CLE)-related protein 4 OS=Arabidopsis thaliana OX=3702 GN=CLE4 PE=2 SV=1	--	--	hypothetical protein TanjilG_31834 [Lupinus angustifolius]
c1043212.graph_c0	[FR]	--	--	K07766|6.91429e-16|mus:104000647|K07766 diphosphoinositol-polyphosphate diphosphatase [EC:3.6.1.52] | (RefSeq) nudix hydrolase 13, mitochondrial	[T]	Signal transduction mechanisms	Dual specificity phosphatase, catalytic domain	Nudix hydrolase 21, chloroplastic OS=Arabidopsis thaliana OX=3702 GN=NUDT21 PE=2 SV=1	L	Replication, recombination and repair	hypothetical protein BU14_0096s0003 [Porphyra umbilicalis]
c1043237.graph_c0	--	--	Molecular Function: nucleotide binding (GO:0000166);; Biological Process: maturation of SSU-rRNA from tricistronic rRNA transcript (SSU-rRNA, 5.8S rRNA, LSU-rRNA) (GO:0000462);; Molecular Function: structural constituent of ribosome (GO:0003735);; Biological Process: translation (GO:0006412);; Cellular Component: cytosolic small ribosomal subunit (GO:0022627);;	K02974|2.92847e-36|olu:OSTLU_42986|K02974 small subunit ribosomal protein S24e | (RefSeq) RPS24; Ribosomal protein S24, component of cytosolic 80S ribosome and 40S small subunit	[J]	Translation, ribosomal structure and biogenesis	Ribosomal protein S24e	40S ribosomal protein S24-2 OS=Arabidopsis thaliana OX=3702 GN=RPS24B PE=2 SV=2	J	Translation, ribosomal structure and biogenesis	Ribosomal protein S24, component of cytosolic 80S ribosome and 40S small subunit, partial [Ostreococcus lucimarinus CCE9901]
c1043284.graph_c0	--	--	--	--	--	--	Ig-like domain from next to BRCA1 gene	--	--	--	hypothetical protein KFL_006150010 [Klebsormidium nitens]
c1043301.graph_c0	--	--	Biological Process: actin cortical patch assembly (GO:0000147);; Molecular Function: actin binding (GO:0003779);; Molecular Function: structural molecule activity (GO:0005198);; Cellular Component: nucleus (GO:0005634);; Cellular Component: cytosol (GO:0005829);; Cellular Component: Arp2/3 protein complex (GO:0005885);; Cellular Component: actin cortical patch (GO:0030479);; Biological Process: A…	K05755|1.62641e-84|ppp:PHYPADRAFT_169316|K05755 actin related protein 2/3 complex, subunit 4 | (RefSeq) hypothetical protein	[Z]	Cytoskeleton	ARP2/3 complex 20 kDa subunit (ARPC4)	Actin-related protein 2/3 complex subunit 4 OS=Arabidopsis thaliana OX=3702 GN=ARPC4 PE=1 SV=1	S	Function unknown	ARP23 complex 20 kDa subunit [Neocallimastix californiae]
c1043339.graph_c0	--	--	--	--	--	--	PLAC8 family	--	--	--	--
c1043363.graph_c1	--	--	--	--	--	--	GDP/GTP exchange factor Sec2p	--	--	--	--
c1043377.graph_c0	[J]	Translation, ribosomal structure and biogenesis	Cellular Component: ribosome (GO:0005840);; Biological Process: ribosome biogenesis (GO:0042254);;	K02941|3.60724e-97|thj:104810080|K02941 large subunit ribosomal protein LP0 | (RefSeq) 60S acidic ribosomal protein P0-like	[J]	Translation, ribosomal structure and biogenesis	60s Acidic ribosomal protein;; Ribosomal protein L10	60S acidic ribosomal protein P0-1 OS=Arabidopsis thaliana OX=3702 GN=RPP0A PE=1 SV=1	J	Translation, ribosomal structure and biogenesis	hypothetical protein K493DRAFT_337268 [Basidiobolus meristosporus CBS 931.73]
c1043419.graph_c0	[T]	Signal transduction mechanisms	Biological Process: signal transduction (GO:0007165);; Molecular Function: kinase activity (GO:0016301);; Biological Process: phosphorylation (GO:0016310);;	--	[T]	Signal transduction mechanisms	Response regulator receiver domain;; Histidine kinase-, DNA gyrase B-, and HSP90-like ATPase	Probable transcriptional regulator ycf27 OS=Cyanidium caldarium OX=2771 GN=ycf27 PE=3 SV=1	T	Signal transduction mechanisms	hypothetical protein SNOG_12641 [Parastagonospora nodorum SN15]
c1043426.graph_c1	--	--	--	--	--	--	--	--	--	--	hypothetical protein PIIN_05338 [Serendipita indica DSM 11827]
c1043454.graph_c0	--	--	Molecular Function: organic cyclic compound binding (GO:0097159);; Molecular Function: heterocyclic compound binding (GO:1901363);;	K15191|2.8092e-20|bna:106367631|K15191 La-related protein 7 | (RefSeq) la-related protein 6A-like	[R]	General function prediction only	La domain;; RNA recognition motif. (a.k.a. RRM, RBD, or RNP domain)	La-related protein 6A OS=Arabidopsis thaliana OX=3702 GN=LARP6A PE=2 SV=1	JO	--	la-related protein 6A [Spinacia oleracea]
c1043463.graph_c0	--	--	Molecular Function: structural constituent of ribosome (GO:0003735);; Cellular Component: vacuolar membrane (GO:0005774);; Cellular Component: Golgi apparatus (GO:0005794);; Biological Process: translation (GO:0006412);; Cellular Component: plasmodesma (GO:0009506);; Cellular Component: cytosolic small ribosomal subunit (GO:0022627);;	K02975|3.17724e-34|ath:AT2G21580|K02975 small subunit ribosomal protein S25e | (RefSeq) Ribosomal protein S25 family protein	[J]	Translation, ribosomal structure and biogenesis	S25 ribosomal protein	40S ribosomal protein S25-2 OS=Arabidopsis thaliana OX=3702 GN=RPS25B PE=3 SV=1	J	Translation, ribosomal structure and biogenesis	40S ribosomal protein S25-2 [Olea europaea var. sylvestris]
c1043543.graph_c0	[O]	Posttranslational modification, protein turnover, chaperones	--	--	[S]	Function unknown	Activator of Hsp90 ATPase, N-terminal;; Activator of Hsp90 ATPase homolog 1-like protein	--	O	Posttranslational modification, protein turnover, chaperones	hypothetical protein CONCODRAFT_75268 [Conidiobolus coronatus NRRL 28638]
c1043613.graph_c0	--	--	Biological Process: maturation of SSU-rRNA from tricistronic rRNA transcript (SSU-rRNA, 5.8S rRNA, LSU-rRNA) (GO:0000462);; Biological Process: endonucleolytic cleavage of tricistronic rRNA transcript (SSU-rRNA, 5.8S rRNA, LSU-rRNA) (GO:0000479);; Molecular Function: nucleic acid binding (GO:0003676);; Cellular Component: nucleus (GO:0005634);;	K14785|3.18764e-33|ppp:PHYPADRAFT_110470|K14785 ESF2/ABP1 family protein | (RefSeq) hypothetical protein	[K]	Transcription	--	--	K	Transcription	predicted protein [Physcomitrella patens]
c1043622.graph_c0	[J]	Translation, ribosomal structure and biogenesis	Molecular Function: structural constituent of ribosome (GO:0003735);; Cellular Component: ribosome (GO:0005840);; Biological Process: translation (GO:0006412);;	K02976|6.87921e-35|nnu:104591292|K02976 small subunit ribosomal protein S26e | (RefSeq) 40S ribosomal protein S26-1-like	[J]	Translation, ribosomal structure and biogenesis	Ribosomal protein S26e	40S ribosomal protein S26-1 OS=Arabidopsis thaliana OX=3702 GN=RPS26A PE=2 SV=2	J	Translation, ribosomal structure and biogenesis	PREDICTED: 40S ribosomal protein S26-1-like [Nelumbo nucifera]
c1043651.graph_c0	--	--	--	--	[O]	Posttranslational modification, protein turnover, chaperones	--	Uncharacterized protein OsI_027940 OS=Oryza sativa subsp. indica OX=39946 GN=OsI_027940 PE=1 SV=2	S	Function unknown	hypothetical protein LIPSTDRAFT_72788 [Lipomyces starkeyi NRRL Y-11557]
c1043727.graph_c1	--	--	Molecular Function: nucleotide binding (GO:0000166);;	K04630|1.55134e-34|bvg:104885887|K04630 guanine nucleotide-binding protein G(i) subunit alpha | (RefSeq) guanine nucleotide-binding protein subunit alpha-like	[T]	Signal transduction mechanisms	G-protein alpha subunit;; ADP-ribosylation factor family	Guanine nucleotide-binding protein alpha-2 subunit OS=Pisum sativum OX=3888 GN=GPA2 PE=2 SV=1	S	Function unknown	hypothetical protein ANO11243_059330 [fungal sp. No.11243]
c1043735.graph_c0	--	--	--	--	--	--	--	--	--	--	hypothetical protein PHMEG_00025574 [Phytophthora megakarya]
c1043759.graph_c0	--	--	--	--	[D]	Cell cycle control, cell division, chromosome partitioning	HORMA domain	--	K	Transcription	hypothetical protein BZG36_02379 [Bifiguratus adelaidae]
c1043778.graph_c0	--	--	--	--	--	--	--	--	--	--	hypothetical protein PSACC_00119 [Paramicrosporidium saccamoebae]
c1043809.graph_c1	[J]	Translation, ribosomal structure and biogenesis	Molecular Function: structural constituent of ribosome (GO:0003735);; Biological Process: translation (GO:0006412);; Cellular Component: small ribosomal subunit (GO:0015935);; Molecular Function: rRNA binding (GO:0019843);;	K02997|1.25158e-64|thj:104822362|K02997 small subunit ribosomal protein S9e | (RefSeq) 40S ribosomal protein S9-2-like	[J]	Translation, ribosomal structure and biogenesis	Ribosomal protein S4/S9 N-terminal domain;; S4 domain	40S ribosomal protein S9-1 OS=Arabidopsis thaliana OX=3702 GN=RPS9B PE=1 SV=1	J	Translation, ribosomal structure and biogenesis	ribosomal protein S9 [Pfiesteria piscicida]
c1043810.graph_c0	--	--	Molecular Function: structural constituent of ribosome (GO:0003735);; Cellular Component: ribosome (GO:0005840);; Biological Process: mRNA processing (GO:0006397);; Biological Process: translation (GO:0006412);;	K02983|9.06493e-17|bpg:Bathy04g00450|K02983 small subunit ribosomal protein S30e | (RefSeq) 40S ribosomal protein S30	[JO]	--	Ribosomal protein S30	40S ribosomal protein S30 OS=Arabidopsis thaliana OX=3702 GN=RPS30A PE=3 SV=3	J	Translation, ribosomal structure and biogenesis	40S ribosomal protein S30 [Bathycoccus prasinos]
c1043833.graph_c0	--	--	Molecular Function: binding (GO:0005488);;	--	[R]	General function prediction only	BAH domain	--	S	Function unknown	uncharacterized protein LOC106776599 [Vigna radiata var. radiata]
c1043949.graph_c0	--	--	--	--	--	--	EF-hand domain;; EF hand;; EF hand;; EF-hand domain pair;; EF-hand domain pair	--	--	--	--
c1043979.graph_c0	[I]	Lipid transport and metabolism	Cellular Component: integral component of membrane (GO:0016021);; Biological Process: sphingolipid biosynthetic process (GO:0030148);; Molecular Function: sphingolipid delta-4 desaturase activity (GO:0042284);; Biological Process: oxidation-reduction process (GO:0055114);;	K04712|2.12271e-83|ppp:PHYPADRAFT_56936|K04712 sphingolipid Delta-4 desaturase [EC:1.14.-.-] | (RefSeq) hypothetical protein	[I]	Lipid transport and metabolism	Sphingolipid Delta4-desaturase (DES);; Fatty acid desaturase	Sphingolipid delta(4)-desaturase DES1-like OS=Oryza sativa subsp. japonica OX=39947 GN=Os02g0639600 PE=2 SV=1	I	Lipid transport and metabolism	fatty acid desaturase family, Zn-binding site [Pythium insidiosum]
c1044000.graph_c0	[O]	Posttranslational modification, protein turnover, chaperones	Cellular Component: membrane (GO:0016020);;	K04097|2.47895e-21|mpp:MICPUCDRAFT_26627|K04097 prostaglandin-H2 D-isomerase / glutathione transferase [EC:5.3.99.2 2.5.1.18] | (RefSeq) hypothetical protein	[O]	Posttranslational modification, protein turnover, chaperones	Glutathione S-transferase, C-terminal domain;; Glutathione S-transferase, N-terminal domain;; Glutathione S-transferase, C-terminal domain	--	O	Posttranslational modification, protein turnover, chaperones	RxLR-like protein [Plasmopara halstedii]
c1044008.graph_c0	--	--	Molecular Function: structural constituent of ribosome (GO:0003735);; Molecular Function: transporter activity (GO:0005215);; Cellular Component: mitochondrial inner membrane (GO:0005743);; Biological Process: translation (GO:0006412);; Cellular Component: integral component of membrane (GO:0016021);; Cellular Component: motile cilium (GO:0031514);; Biological Process: transmembrane transport (GO…	K05863|3.76677e-58|mis:MICPUN_108589|K05863 solute carrier family 25 (mitochondrial adenine nucleotide translocator), member 4/5/6/31 | (RefSeq) mitochondrial carrier family	[C]	Energy production and conversion	Mitochondrial carrier protein	ADP,ATP carrier protein OS=Parachlorella kessleri OX=3074 PE=3 SV=1	U	Intracellular trafficking, secretion, and vesicular transport	predicted protein [Hordeum vulgare subsp. vulgare]
c1044032.graph_c0	--	--	--	--	[U]	Intracellular trafficking, secretion, and vesicular transport	emp24/gp25L/p24 family/GOLD	Transmembrane emp24 domain-containing protein p24delta5 OS=Arabidopsis thaliana OX=3702 GN=At1g21900 PE=1 SV=1	U	Intracellular trafficking, secretion, and vesicular transport	hypothetical protein H257_17006 [Aphanomyces astaci]
c1044047.graph_c0	[K]	Transcription	Biological Process: transcription, DNA-templated (GO:0006351);; Cellular Component: intracellular part (GO:0044424);;	K03019|8.89868e-19|csl:COCSUDRAFT_28851|K03019 DNA-directed RNA polymerase III subunit RPC11 | (RefSeq) hypothetical protein	[K]	Transcription	Transcription factor S-II (TFIIS)	Transcription elongation factor TFIIS OS=Arabidopsis thaliana OX=3702 GN=TFIIS PE=1 SV=1	K	Transcription	hypothetical protein HETIRDRAFT_314122 [Heterobasidion irregulare TC 32-1]
c1044051.graph_c0	[R]	General function prediction only	Cellular Component: intracellular (GO:0005622);;	K14004|1.726e-91|mis:MICPUN_95648|K14004 protein transport protein SEC13 | (RefSeq) hypothetical protein	[U]	Intracellular trafficking, secretion, and vesicular transport	WD domain, G-beta repeat;; Anaphase-promoting complex subunit 4 WD40 domain	Protein transport protein SEC13 homolog A OS=Arabidopsis thaliana OX=3702 GN=SEC13A PE=1 SV=1	U	Intracellular trafficking, secretion, and vesicular transport	protein transport protein sec13 [Plasmopara halstedii]
c1044101.graph_c0	--	--	--	--	[I]	Lipid transport and metabolism	Inositol phospholipid synthesis and fat-storage-inducing TM	--	S	Function unknown	inositol phospholipid biosynthesis protein scs3 [Lichtheimia corymbifera JMRC:FSU:9682]
c1044132.graph_c0	--	--	--	--	--	--	GGL domain	--	--	--	--
c1044158.graph_c0	--	--	Molecular Function: binding (GO:0005488);; Biological Process: G-protein coupled receptor signaling pathway (GO:0007186);;	K19729|6.12526e-50|mus:103999203|K19729 guanine nucleotide-binding protein G(t) subunit alpha 3 | (RefSeq) guanine nucleotide-binding protein alpha-2 subunit isoform X1	[DT]	--	G-protein alpha subunit;; ADP-ribosylation factor family	Guanine nucleotide-binding protein alpha-2 subunit OS=Pisum sativum OX=3888 GN=GPA2 PE=2 SV=1	S	Function unknown	Guanine nucleotide-binding protein subunit alpha [Smittium culicis]
c1044221.graph_c1	[G]	Carbohydrate transport and metabolism	Molecular Function: glyceraldehyde-3-phosphate dehydrogenase (NAD+) (phosphorylating) activity (GO:0004365);; Cellular Component: cytoplasm (GO:0005737);; Biological Process: glucose metabolic process (GO:0006006);; Biological Process: glycolytic process (GO:0006096);; Molecular Function: NADP binding (GO:0050661);; Molecular Function: NAD binding (GO:0051287);; Biological Process: oxidation-redu…	K00134|9.09309e-43|pvu:PHAVU_009G1684001|K00134 glyceraldehyde 3-phosphate dehydrogenase [EC:1.2.1.12] | (RefSeq) hypothetical protein	[G]	Carbohydrate transport and metabolism	Glyceraldehyde 3-phosphate dehydrogenase, C-terminal domain	Glyceraldehyde-3-phosphate dehydrogenase, cytosolic OS=Antirrhinum majus OX=4151 GN=GAPC PE=2 SV=1	G	Carbohydrate transport and metabolism	hypothetical protein PHAVU_009G1684001g, partial [Phaseolus vulgaris]
c1044265.graph_c1	[IQR]	--	--	--	[Q]	Secondary metabolites biosynthesis, transport and catabolism	--	Short-chain dehydrogenase TIC 32, chloroplastic OS=Arabidopsis thaliana OX=3702 GN=TIC32 PE=2 SV=1	S	Function unknown	Env9p [Sugiyamaella lignohabitans]
c1044279.graph_c0	[G]	Carbohydrate transport and metabolism	Biological Process: carbohydrate metabolic process (GO:0005975);; Biological Process: pentose-phosphate shunt (GO:0006098);; Molecular Function: 6-phosphogluconolactonase activity (GO:0017057);;	K01057|2.04824e-63|atr:18438903|K01057 6-phosphogluconolactonase [EC:3.1.1.31] | (RefSeq) probable 6-phosphogluconolactonase 4, chloroplastic	[G]	Carbohydrate transport and metabolism	Glucosamine-6-phosphate isomerases/6-phosphogluconolactonase	Probable 6-phosphogluconolactonase 3, chloroplastic OS=Oryza sativa subsp. japonica OX=39947 GN=Os08g0547100 PE=2 SV=1	G	Carbohydrate transport and metabolism	6-phosphogluconolactonase, putative [Phytophthora infestans T30-4]
c1044288.graph_c0	[J]	Translation, ribosomal structure and biogenesis	Molecular Function: structural constituent of ribosome (GO:0003735);; Cellular Component: ribosome (GO:0005840);; Biological Process: translation (GO:0006412);;	K02894|4.20411e-39|cre:CHLREDRAFT_159282|K02894 large subunit ribosomal protein L23e | (RefSeq) RPL23; ribosomal protein L23, component of cytosolic 80S ribosome and 60S large subunit	[J]	Translation, ribosomal structure and biogenesis	Ribosomal protein L14p/L23e	60S ribosomal protein L23 OS=Arabidopsis thaliana OX=3702 GN=RPL23A PE=2 SV=3	J	Translation, ribosomal structure and biogenesis	60S ribosomal protein L23 [Rhizopus delemar RA 99-880]
c1044309.graph_c0	--	--	Biological Process: organelle organization (GO:0006996);; Cellular Component: cell part (GO:0044464);;	K17279|9.90686e-27|aip:107628914|K17279 receptor expression-enhancing protein 5/6 | (RefSeq) HVA22-like protein k	[U]	Intracellular trafficking, secretion, and vesicular transport	TB2/DP1, HVA22 family	HVA22-like protein k OS=Arabidopsis thaliana OX=3702 GN=HVA22K PE=2 SV=1	U	Intracellular trafficking, secretion, and vesicular transport	hypothetical protein MVEG_05096 [Mortierella verticillata NRRL 6337]
c1044349.graph_c0	--	--	--	--	--	--	UEV domain	--	--	--	--
c1044352.graph_c0	--	--	Biological Process: actin polymerization or depolymerization (GO:0008154);; Biological Process: cellular component assembly (GO:0022607);; Biological Process: regulation of cellular component organization (GO:0051128);;	--	--	--	P21-Rho-binding domain;; EF-hand domain	--	S	Function unknown	PAK-box/P21-Rho-binding domain-containing protein [Rozella allomycis CSF55]
c1044409.graph_c0	[J]	Translation, ribosomal structure and biogenesis	Molecular Function: structural constituent of ribosome (GO:0003735);; Cellular Component: ribosome (GO:0005840);; Biological Process: translation (GO:0006412);;	K02979|5.27522e-19|ccp:CHC_T00010061001|K02979 small subunit ribosomal protein S28e | (RefSeq) 40S ribosomal protein S28	[J]	Translation, ribosomal structure and biogenesis	Ribosomal protein S28e	40S ribosomal protein S28 OS=Zea mays OX=4577 GN=RPS28 PE=3 SV=1	J	Translation, ribosomal structure and biogenesis	Putative 40S ribosomal protein S28 [Rhizopus microsporus]
c1044461.graph_c0	--	--	Molecular Function: binding (GO:0005488);; Biological Process: regulation of transcription, DNA-templated (GO:0006355);;	--	--	--	--	--	S	Function unknown	hypothetical protein AOL_s00006g360 [Arthrobotrys oligospora ATCC 24927]
c1044479.graph_c0	--	--	Cellular Component: integral component of membrane (GO:0016021);;	--	--	--	Stress up-regulated Nod 19	--	S	Function unknown	Hypothetical protein PINS_010038 [Pythium insidiosum]
c1044515.graph_c0	--	--	--	--	--	--	60s Acidic ribosomal protein	--	--	--	--
c1044533.graph_c0	--	--	--	--	--	--	--	--	--	--	hypothetical protein RIR_2651700 [Rhizophagus irregularis DAOM 181602]
c1044537.graph_c0	[U]	Intracellular trafficking, secretion, and vesicular transport	--	K07297|1.60574e-38|pop:POPTR_0018s11140g|K07297 adiponectin receptor | (RefSeq) POPTRDRAFT_912270; hypothetical protein	[RT]	--	Haemolysin-III related	Heptahelical transmembrane protein 2 OS=Arabidopsis thaliana OX=3702 GN=HHP2 PE=2 SV=1	S	Function unknown	putative protein [Arabidopsis thaliana]
c1044550.graph_c0	[J]	Translation, ribosomal structure and biogenesis	Cellular Component: cytosol (GO:0005829);; Biological Process: gene expression (GO:0010467);; Cellular Component: small ribosomal subunit (GO:0015935);; Biological Process: cellular nitrogen compound metabolic process (GO:0034641);; Biological Process: primary metabolic process (GO:0044238);; Biological Process: cellular macromolecule metabolic process (GO:0044260);;	K02969|2.01597e-32|fve:101310405|K02969 small subunit ribosomal protein S20e | (RefSeq) 40S ribosomal protein S20-1-like	[J]	Translation, ribosomal structure and biogenesis	Ribosomal protein S10p/S20e	40S ribosomal protein S20 OS=Oryza sativa subsp. japonica OX=39947 GN=RPS20 PE=2 SV=2	J	Translation, ribosomal structure and biogenesis	PREDICTED: 40S ribosomal protein S20-1-like [Fragaria vesca subsp. vesca]
c1044570.graph_c0	--	--	--	--	--	--	Shwachman-Bodian-Diamond syndrome (SBDS) protein	--	S	Function unknown	hypothetical protein PV09_00850 [Verruconis gallopava]
c1044612.graph_c0	[J]	Translation, ribosomal structure and biogenesis	Molecular Function: structural constituent of ribosome (GO:0003735);; Cellular Component: ribosome (GO:0005840);; Biological Process: translation (GO:0006412);;	K02976|2.42786e-42|nnu:104586585|K02976 small subunit ribosomal protein S26e | (RefSeq) 40S ribosomal protein S26-1-like	[J]	Translation, ribosomal structure and biogenesis	Ribosomal protein S26e	40S ribosomal protein S26-3 OS=Arabidopsis thaliana OX=3702 GN=RPS26C PE=2 SV=1	J	Translation, ribosomal structure and biogenesis	ribosomal 40S subunit protein S26B [Rhizophagus irregularis DAOM 197198w]
c1044632.graph_c0	[J]	Translation, ribosomal structure and biogenesis	Molecular Function: mRNA binding (GO:0003729);; Molecular Function: structural constituent of ribosome (GO:0003735);; Cellular Component: ribosome (GO:0005840);; Biological Process: translation (GO:0006412);;	K02871|1.05421e-33|smo:SELMODRAFT_7664|K02871 large subunit ribosomal protein L13 | (RefSeq) hypothetical protein	[J]	Translation, ribosomal structure and biogenesis	Ribosomal protein L13	50S ribosomal protein L13, chloroplastic OS=Porphyra purpurea OX=2787 GN=rpl13 PE=3 SV=1	J	Translation, ribosomal structure and biogenesis	predicted protein, partial [Thalassiosira pseudonana CCMP1335]
c1044706.graph_c0	[O]	Posttranslational modification, protein turnover, chaperones	Molecular Function: glutathione transferase activity (GO:0004364);;	K00799|1.01392e-31|ppp:PHYPADRAFT_183533|K00799 glutathione S-transferase [EC:2.5.1.18] | (RefSeq) hypothetical protein	[O]	Posttranslational modification, protein turnover, chaperones	Glutathione S-transferase, N-terminal domain;; Glutathione S-transferase, N-terminal domain;; Glutathione S-transferase, N-terminal domain	Glutathione S-transferase PM239X14 OS=Arabidopsis thaliana OX=3702 PE=2 SV=1	O	Posttranslational modification, protein turnover, chaperones	Glutathione S-transferase F5 Short=AtGSTF5 [Rhizoctonia solani AG-1 IB]
c1044708.graph_c0	--	--	Molecular Function: magnesium ion binding (GO:0000287);; Molecular Function: pyruvate kinase activity (GO:0004743);; Biological Process: glycolytic process (GO:0006096);; Molecular Function: kinase activity (GO:0016301);; Molecular Function: potassium ion binding (GO:0030955);;	K00873|2.07267e-10|tcc:TCM_038629|K00873 pyruvate kinase [EC:2.7.1.40] | (RefSeq) Pyruvate kinase family protein isoform 1	[G]	Carbohydrate transport and metabolism	--	Pyruvate kinase, cytosolic isozyme OS=Nicotiana tabacum OX=4097 PE=2 SV=1	G	Carbohydrate transport and metabolism	PREDICTED: pyruvate kinase, cytosolic isozyme [Theobroma cacao]
c1044759.graph_c0	[J]	Translation, ribosomal structure and biogenesis	Biological Process: ribosomal large subunit assembly (GO:0000027);; Molecular Function: structural constituent of ribosome (GO:0003735);; Biological Process: translation (GO:0006412);; Molecular Function: rRNA binding (GO:0019843);; Cellular Component: cytosolic large ribosomal subunit (GO:0022625);;	K02870|5.66709e-64|mpp:MICPUCDRAFT_30629|K02870 large subunit ribosomal protein L12e | (RefSeq) hypothetical protein	[J]	Translation, ribosomal structure and biogenesis	Ribosomal protein L11, N-terminal domain;; Ribosomal protein L11, RNA binding domain	60S ribosomal protein L12-1 OS=Arabidopsis thaliana OX=3702 GN=RPL12A PE=2 SV=2	J	Translation, ribosomal structure and biogenesis	hypothetical protein H257_04561 [Aphanomyces astaci]
c1044768.graph_c0	[R]	General function prediction only	--	--	--	--	Succinylglutamate desuccinylase / Aspartoacylase family	--	S	Function unknown	predicted protein [Thalassiosira pseudonana CCMP1335]
c1044778.graph_c0	[C]	Energy production and conversion	Molecular Function: electron carrier activity (GO:0009055);; Biological Process: electron transport chain (GO:0022900);; Molecular Function: metal ion binding (GO:0046872);; Molecular Function: 2 iron, 2 sulfur cluster binding (GO:0051537);;	K02639|4.84922e-16|gmx:100499711|K02639 ferredoxin | (RefSeq) uncharacterized LOC100499711	--	--	--	Ferredoxin-3, chloroplastic OS=Zea mays OX=4577 GN=FDX3 PE=1 SV=1	C	Energy production and conversion	uncharacterized protein LOC109798271 isoform X1 [Cajanus cajan]
c1044806.graph_c0	--	--	--	--	--	--	Thaumatin family	Osmotin-like protein OSM34 OS=Arabidopsis thaliana OX=3702 GN=OSM34 PE=2 SV=2	S	Function unknown	PREDICTED: protein P21-like [Lupinus angustifolius]
c1044821.graph_c1	--	--	Molecular Function: transferase activity (GO:0016740);;	K00592|5.07944e-23|ppp:PHYPADRAFT_156277|K00592 [ribulose-bisphosphate carboxylase]-lysine N-methyltransferase [EC:2.1.1.127] | (RefSeq) hypothetical protein	[R]	General function prediction only	SET domain	[Fructose-bisphosphate aldolase]-lysine N-methyltransferase, chloroplastic OS=Arabidopsis thaliana OX=3702 GN=LSMT-L PE=1 SV=1	S	Function unknown	hypothetical protein FisN_10Hh082 [Fistulifera solaris]
c1044822.graph_c0	[O]	Posttranslational modification, protein turnover, chaperones	Biological Process: protein peptidyl-prolyl isomerization (GO:0000413);; Molecular Function: peptidyl-prolyl cis-trans isomerase activity (GO:0003755);; Biological Process: protein folding (GO:0006457);;	K12734|1.80586e-72|pxb:103967707|K12734 peptidyl-prolyl cis-trans isomerase-like 3 [EC:5.2.1.8] | (RefSeq) peptidyl-prolyl cis-trans isomerase CYP18-1	[O]	Posttranslational modification, protein turnover, chaperones	Cyclophilin type peptidyl-prolyl cis-trans isomerase/CLD	Peptidyl-prolyl cis-trans isomerase CYP18-1 OS=Arabidopsis thaliana OX=3702 GN=CYP18-1 PE=2 SV=1	O	Posttranslational modification, protein turnover, chaperones	Peptidyl-prolyl cis-trans isomerase-like 3 [Bifiguratus adelaidae]
c1044824.graph_c0	[T]	Signal transduction mechanisms	Biological Process: autophagy of mitochondrion (GO:0000422);; Molecular Function: calcium ion binding (GO:0005509);; Cellular Component: cytosol (GO:0005829);; Biological Process: protein lipidation (GO:0006497);; Cellular Component: extrinsic component of membrane (GO:0019898);; Molecular Function: phosphatidylinositol-3-phosphate binding (GO:0032266);; Cellular Component: pre-autophagosomal str…	--	[S]	Function unknown	WD domain, G-beta repeat;; Anaphase-promoting complex subunit 4 WD40 domain	Autophagy-related protein 18c OS=Arabidopsis thaliana OX=3702 GN=ATG18C PE=2 SV=1	S	Function unknown	hypothetical protein PHMEG_0004166 [Phytophthora megakarya]
c1044893.graph_c0	[J]	Translation, ribosomal structure and biogenesis	Biological Process: mRNA splicing, via spliceosome (GO:0000398);; Molecular Function: binding (GO:0005488);;	K12896|4.74424e-24|zma:100280612|K12896 splicing factor, arginine/serine-rich 7 | (RefSeq) pco118328a; uncharacterized LOC100280612	[A]	RNA processing and modification	RNA recognition motif. (a.k.a. RRM, RBD, or RNP domain)	Serine/arginine-rich splicing factor RSZ21A OS=Oryza sativa subsp. japonica OX=39947 GN=RSZ21A PE=2 SV=1	S	Function unknown	hypothetical protein KFL_007200030 [Klebsormidium nitens]
c1044979.graph_c0	--	--	--	--	--	--	Protein of unknown function (DUF2462)	--	--	--	--
c1045119.graph_c0	--	--	--	--	--	--	--	--	--	--	hypothetical protein SDRG_00652 [Saprolegnia diclina VS20]
c1045122.graph_c0	--	--	Biological Process: actin cortical patch assembly (GO:0000147);; Molecular Function: actin binding (GO:0003779);; Molecular Function: structural molecule activity (GO:0005198);; Cellular Component: nucleus (GO:0005634);; Cellular Component: cytosol (GO:0005829);; Cellular Component: Arp2/3 protein complex (GO:0005885);; Cellular Component: actin cortical patch (GO:0030479);; Biological Process: A…	K05755|8.38325e-75|ppp:PHYPADRAFT_169316|K05755 actin related protein 2/3 complex, subunit 4 | (RefSeq) hypothetical protein	[Z]	Cytoskeleton	ARP2/3 complex 20 kDa subunit (ARPC4)	Actin-related protein 2/3 complex subunit 4 OS=Arabidopsis thaliana OX=3702 GN=ARPC4 PE=1 SV=1	S	Function unknown	ARP23 complex 20 kDa subunit [Rhizoclosmatium globosum]
c1045136.graph_c0	[R]	General function prediction only	--	K06911|1.20186e-103|dosa:Os03t0845000-01|K06911 uncharacterized protein | (RAP-DB) Os03g0845000; Similar to Pirin-like protein.	--	--	Pirin;; Pirin C-terminal cupin domain	Pirin-like protein OS=Solanum lycopersicum OX=4081 PE=2 SV=1	S	Function unknown	RmlC-like cupin domain-containing protein [Lobosporangium transversale]
c1045166.graph_c0	[R]	General function prediction only	--	--	[GOT]	--	TPR repeat;; Tetratricopeptide repeat;; Tetratricopeptide repeat;; Tetratricopeptide repeat;; Tetratricopeptide repeat;; Tetratricopeptide repeat;; Tetratricopeptide repeat;; Tetratricopeptide repeat;; Tetratricopeptide repeat	Probable UDP-N-acetylglucosamine--peptide N-acetylglucosaminyltransferase SPINDLY OS=Arabidopsis thaliana OX=3702 GN=SPY PE=1 SV=1	S	Function unknown	hypothetical protein TRAPUB_826 [Trametes pubescens]
c1045225.graph_c0	[T]	Signal transduction mechanisms	--	--	[G]	Carbohydrate transport and metabolism	Calcineurin-like phosphoesterase;; Purple acid Phosphatase, N-terminal domain;; Iron/zinc purple acid phosphatase-like protein C	Purple acid phosphatase 18 OS=Arabidopsis thaliana OX=3702 GN=PAP18 PE=2 SV=1	S	Function unknown	Calcineurin-like phosphoesterase [Phytophthora megakarya]
c1045227.graph_c0	--	--	Biological Process: cytoplasmic translation (GO:0002181);; Molecular Function: structural constituent of ribosome (GO:0003735);; Cellular Component: cytosolic large ribosomal subunit (GO:0022625);;	K02920|7.1085e-28|csl:COCSUDRAFT_65116|K02920 large subunit ribosomal protein L36e | (RefSeq) ribosomal protein L36 component of cytosolic 80S ribosome and 60S large subunit	[J]	Translation, ribosomal structure and biogenesis	Ribosomal protein L36e	60S ribosomal protein L36-3 OS=Arabidopsis thaliana OX=3702 GN=RPL36C PE=3 SV=1	J	Translation, ribosomal structure and biogenesis	50S ribosomal protein L36e [Pythium insidiosum]
c1045246.graph_c0	[O]	Posttranslational modification, protein turnover, chaperones	--	K17609|5.38279e-35|mtr:MTR_8g064810|K17609 nucleoredoxin [EC:1.8.1.8] | (RefSeq) protein disulfide isomerase (PDI)-like protein	[R]	General function prediction only	Thioredoxin-like;; AhpC/TSA family;; Thioredoxin	Probable nucleoredoxin 1 OS=Arabidopsis thaliana OX=3702 GN=At1g60420 PE=1 SV=1	O	Posttranslational modification, protein turnover, chaperones	probable nucleoredoxin 1 [Chenopodium quinoa]
c1045254.graph_c0	--	--	--	--	--	--	Protein of unknown function (DUF563)	--	--	--	--
c1045266.graph_c0	[E]	Amino acid transport and metabolism	Biological Process: metabolic process (GO:0008152);; Molecular Function: transferase activity, transferring acyl groups (GO:0016746);;	K00620|2.16178e-68|gsl:Gasu_05650|K00620 glutamate N-acetyltransferase / amino-acid N-acetyltransferase [EC:2.3.1.35 2.3.1.1] | (RefSeq) bifunctional glutamate N-acetyltransferase / amino-acid N-acetyltransferase	[E]	Amino acid transport and metabolism	ArgJ family	Arginine biosynthesis bifunctional protein ArgJ, chloroplastic OS=Zea mays OX=4577 PE=2 SV=1	E	Amino acid transport and metabolism	hypothetical protein COCCADRAFT_105114 [Bipolaris zeicola 26-R-13]
c1045305.graph_c0	[J]	Translation, ribosomal structure and biogenesis	Molecular Function: RNA binding (GO:0003723);; Molecular Function: structural constituent of ribosome (GO:0003735);; Biological Process: translation (GO:0006412);; Cellular Component: small ribosomal subunit (GO:0015935);;	K02989|3.68924e-47|gsl:Gasu_44440|K02989 small subunit ribosomal protein S5e | (RefSeq) 40S ribosomal protein S5e	[J]	Translation, ribosomal structure and biogenesis	Ribosomal protein S7p/S5e	40S ribosomal protein S5 (Fragment) OS=Cicer arietinum OX=3827 GN=RPS5 PE=2 SV=1	J	Translation, ribosomal structure and biogenesis	40S ribosomal protein S5 [Basidiobolus meristosporus CBS 931.73]
c1045314.graph_c0	--	--	Cellular Component: plasmodesma (GO:0009506);;	--	[T]	Signal transduction mechanisms	T-complex protein 11	--	S	Function unknown	PREDICTED: uncharacterized protein LOC100811199 [Glycine max]
c1045342.graph_c1	[E]	Amino acid transport and metabolism	--	--	[E]	Amino acid transport and metabolism	Glutaminase;; Variant SH3 domain;; Variant SH3 domain;; SH3 domain	--	E	Amino acid transport and metabolism	glutaminase [Emiliania huxleyi CCMP1516]
c1045351.graph_c0	--	--	Molecular Function: protein binding (GO:0005515);; Cellular Component: cell wall (GO:0005618);; Cellular Component: nuclear envelope (GO:0005635);; Cellular Component: nucleolus (GO:0005730);; Cellular Component: cytosol (GO:0005829);; Biological Process: protein import into nucleus (GO:0006606);;	--	[U]	Intracellular trafficking, secretion, and vesicular transport	Armadillo/beta-catenin-like repeat;; HEAT-like repeat;; HEAT repeats;; Atypical Arm repeat;; HEAT repeat;; Rapamycin-insensitive companion of mTOR, domain 5;; Importin beta binding domain;; PBS lyase HEAT-like repeat	Importin subunit alpha-1 OS=Arabidopsis thaliana OX=3702 GN=IMPA1 PE=1 SV=2	U	Intracellular trafficking, secretion, and vesicular transport	importin subunit alpha-like isoform X1 [Chenopodium quinoa]
c1045367.graph_c0	[I]	Lipid transport and metabolism	Molecular Function: 3-hydroxyacyl-CoA dehydrogenase activity (GO:0003857);; Biological Process: fatty acid metabolic process (GO:0006631);; Biological Process: oxidation-reduction process (GO:0055114);; Molecular Function: NAD+ binding (GO:0070403);;	K00074|3.47753e-85|ppp:PHYPADRAFT_114928|K00074 3-hydroxybutyryl-CoA dehydrogenase [EC:1.1.1.157] | (RefSeq) hypothetical protein	[I]	Lipid transport and metabolism	3-hydroxyacyl-CoA dehydrogenase, NAD binding domain;; 3-hydroxyacyl-CoA dehydrogenase, C-terminal domain	Glyoxysomal fatty acid beta-oxidation multifunctional protein MFP-a OS=Brassica napus OX=3708 PE=2 SV=2	I	Lipid transport and metabolism	hypothetical protein BATDEDRAFT_29410 [Batrachochytrium dendrobatidis JAM81]
c1045387.graph_c0	[C]	Energy production and conversion	Molecular Function: catalytic activity (GO:0003824);;	K00102|1.2878e-22|cmo:103486719|K00102 D-lactate dehydrogenase (cytochrome) [EC:1.1.2.4] | (RefSeq) D-lactate dehydrogenase [cytochrome], mitochondrial	[R]	General function prediction only	FAD linked oxidases, C-terminal domain;; FAD binding domain	D-lactate dehydrogenase [cytochrome], mitochondrial OS=Arabidopsis thaliana OX=3702 GN=DLD PE=1 SV=1	C	Energy production and conversion	hypothetical protein GUITHDRAFT_157810 [Guillardia theta CCMP2712]
c1045389.graph_c0	--	--	--	--	--	--	--	--	S	Function unknown	hypothetical protein K493DRAFT_265459 [Basidiobolus meristosporus CBS 931.73]
c1045430.graph_c0	--	--	Biological Process: activation of MAPKK activity (GO:0000186);; Molecular Function: MAP kinase kinase kinase activity (GO:0004709);; Molecular Function: ATP binding (GO:0005524);; Cellular Component: intracellular (GO:0005622);;	--	--	--	--	--	T	Signal transduction mechanisms	hypothetical protein LR48_Vigan04g029300 [Vigna angularis]
c1045451.graph_c0	--	--	--	--	--	--	SGF29 tudor-like domain	--	--	--	--
c1045523.graph_c0	--	--	Molecular Function: structural constituent of ribosome (GO:0003735);; Biological Process: translation (GO:0006412);; Cellular Component: cytosolic small ribosomal subunit (GO:0022627);;	K02951|2.70242e-33|ccp:CHC_T00010265001|K02951 small subunit ribosomal protein S12e | (RefSeq) 40S ribosomal protein S12	[J]	Translation, ribosomal structure and biogenesis	Ribosomal protein L7Ae/L30e/S12e/Gadd45 family	40S ribosomal protein S12 OS=Cyanophora paradoxa OX=2762 GN=RPS12 PE=2 SV=1	J	Translation, ribosomal structure and biogenesis	hypothetical protein T552_00083 [Pneumocystis carinii B80]
c1045569.graph_c0	--	--	--	--	[OR]	--	Ubiquitin family;; Ubiquitin-2 like Rad60 SUMO-like	Polyubiquitin (Fragment) OS=Hordeum vulgare OX=4513 PE=2 SV=1	S	Function unknown	predicted protein [Micromonas pusilla CCMP1545]
c1045586.graph_c0	[T]	Signal transduction mechanisms	--	--	--	--	Universal stress protein family	Universal stress protein PHOS34 OS=Arabidopsis thaliana OX=3702 GN=PHOS34 PE=1 SV=1	S	Function unknown	Adenine nucleotide alpha hydrolases-like superfamily [Zostera marina]
c1045637.graph_c0	--	--	Cellular Component: mitochondrion (GO:0005739);; Biological Process: cellular process (GO:0009987);; Cellular Component: membrane (GO:0016020);; Biological Process: oxidation-reduction process (GO:0055114);;	K00417|4.42362e-08|brp:103850902|K00417 ubiquinol-cytochrome c reductase subunit 7 | (RefSeq) cytochrome b-c1 complex subunit 7-1	[C]	Energy production and conversion	Ubiquinol-cytochrome C reductase complex 14kD subunit	Cytochrome b-c1 complex subunit 7-1 OS=Arabidopsis thaliana OX=3702 GN=QCR7-1 PE=1 SV=1	C	Energy production and conversion	cytochrome b-c1 complex subunit 7 [Catenaria anguillulae PL171]
c1045687.graph_c1	[J]	Translation, ribosomal structure and biogenesis	Cellular Component: intracellular ribonucleoprotein complex (GO:0030529);;	K02941|6.84484e-26|cit:102614755|K02941 large subunit ribosomal protein LP0 | (RefSeq) 60S acidic ribosomal protein P0-like	[J]	Translation, ribosomal structure and biogenesis	--	60S acidic ribosomal protein P0 OS=Glycine max OX=3847 PE=2 SV=1	J	Translation, ribosomal structure and biogenesis	50S ribosomal protein LP0 [Saprolegnia diclina VS20]
c1045695.graph_c0	--	--	Cellular Component: membrane (GO:0016020);;	K09481|6.16747e-14|gra:105790051|K09481 protein transport protein SEC61 subunit beta | (RefSeq) protein transport protein Sec61 subunit beta-like	[O]	Posttranslational modification, protein turnover, chaperones	Sec61beta family	Protein transport protein Sec61 subunit beta OS=Chlamydomonas reinhardtii OX=3055 GN=SEC61B PE=1 SV=1	U	Intracellular trafficking, secretion, and vesicular transport	protein transporter SEC61 subunit beta [Mortierella verticillata NRRL 6337]
c1045730.graph_c1	[O]	Posttranslational modification, protein turnover, chaperones	Molecular Function: ATP binding (GO:0005524);; Cellular Component: nucleus (GO:0005634);; Cellular Component: cytosol (GO:0005829);; Biological Process: postreplication repair (GO:0006301);; Biological Process: free ubiquitin chain polymerization (GO:0010994);; Cellular Component: ubiquitin conjugating enzyme complex (GO:0031371);; Molecular Function: ubiquitin protein ligase binding (GO:0031625)…	K10580|8.64167e-79|pda:103697914|K10580 ubiquitin-conjugating enzyme E2 N [EC:2.3.2.23] | (RefSeq) ubiquitin-conjugating enzyme E2 36-like	[O]	Posttranslational modification, protein turnover, chaperones	Ubiquitin-conjugating enzyme	Ubiquitin-conjugating enzyme E2 35 OS=Arabidopsis thaliana OX=3702 GN=UBC35 PE=1 SV=1	O	Posttranslational modification, protein turnover, chaperones	ubiquitin-conjugating enzyme E2 N [Phytophthora parasitica INRA-310]
c1045766.graph_c0	--	--	Molecular Function: transferase activity (GO:0016740);;	--	[O]	Posttranslational modification, protein turnover, chaperones	CS domain	Uncharacterized protein At3g03773 OS=Arabidopsis thaliana OX=3702 GN=At3g03773 PE=1 SV=1	S	Function unknown	hypothetical protein PPTG_09046 [Phytophthora parasitica INRA-310]
c1045776.graph_c0	--	--	Biological Process: pathogenesis (GO:0009405);; Biological Process: glycolipid transport (GO:0046836);;	--	[G]	Carbohydrate transport and metabolism	Glycolipid transfer protein (GLTP)	Glycolipid transfer protein 1 OS=Arabidopsis thaliana OX=3702 GN=GLTP1 PE=2 SV=1	U	Intracellular trafficking, secretion, and vesicular transport	glycolipid transfer protein [Sistotremastrum niveocremeum HHB9708]
c1045793.graph_c2	--	--	--	--	[J]	Translation, ribosomal structure and biogenesis	Ribosomal protein L36e	--	--	--	--
c1045813.graph_c0	[G]	Carbohydrate transport and metabolism	Molecular Function: alpha-mannosidase activity (GO:0004559);; Biological Process: mannose metabolic process (GO:0006013);; Biological Process: protein deglycosylation (GO:0006517);; Molecular Function: zinc ion binding (GO:0008270);; Molecular Function: carbohydrate binding (GO:0030246);;	K01191|2.43859e-62|ppp:PHYPADRAFT_136484|K01191 alpha-mannosidase [EC:3.2.1.24] | (RefSeq) hypothetical protein	[G]	Carbohydrate transport and metabolism	Glycosyl hydrolases family 38 N-terminal domain	Probable alpha-mannosidase At5g13980 OS=Arabidopsis thaliana OX=3702 GN=At5g13980 PE=2 SV=1	G	Carbohydrate transport and metabolism	hypothetical protein PHYPA_029980 [Physcomitrella patens]
c1045838.graph_c0	--	--	--	K09548|6.83376e-11|mus:103980266|K09548 prefoldin subunit 1 | (RefSeq) prefoldin subunit 1	[O]	Posttranslational modification, protein turnover, chaperones	Prefoldin subunit	--	O	Posttranslational modification, protein turnover, chaperones	Prefoldin [Basidiobolus meristosporus CBS 931.73]
c1045839.graph_c0	--	--	Cellular Component: cell part (GO:0044464);;	K05765|1.10232e-20|csv:101220871|K05765 cofilin | (RefSeq) actin-depolymerizing factor 7	[Z]	Cytoskeleton	Cofilin/tropomyosin-type actin-binding protein	Actin-depolymerizing factor 7 OS=Arabidopsis thaliana OX=3702 GN=ADF7 PE=2 SV=1	S	Function unknown	hypothetical protein AMAG_17206 [Allomyces macrogynus ATCC 38327]
c1045846.graph_c0	--	--	Biological Process: pheromone-dependent signal transduction involved in conjugation with cellular fusion (GO:0000750);; Molecular Function: double-stranded DNA binding (GO:0003690);; Cellular Component: nucleus (GO:0005634);; Cellular Component: cytosol (GO:0005829);; Biological Process: mRNA catabolic process (GO:0006402);; Biological Process: negative regulation of septation initiation signalin…	--	[R]	General function prediction only	Zinc finger C-x8-C-x5-C-x3-H type (and similar)	Zinc finger CCCH domain-containing protein 14 OS=Arabidopsis thaliana OX=3702 GN=At1g66810 PE=2 SV=1	S	Function unknown	predicted protein, partial [Ostreococcus lucimarinus CCE9901]
c1045890.graph_c0	--	--	--	--	--	--	Fungal potassium channel	--	S	Function unknown	hypothetical protein RMATCC62417_01718 [Rhizopus microsporus]
c1045892.graph_c0	--	--	Biological Process: cytoplasmic translation (GO:0002181);; Molecular Function: structural constituent of ribosome (GO:0003735);; Cellular Component: cytosolic large ribosomal subunit (GO:0022625);;	K02920|2.60384e-23|cre:CHLREDRAFT_195597|K02920 large subunit ribosomal protein L36e | (RefSeq) RPL36; ribosomal protein L36, component of cytosolic 80S ribosome and 60S large subunit	[J]	Translation, ribosomal structure and biogenesis	Ribosomal protein L36e	60S ribosomal protein L36-3 OS=Arabidopsis thaliana OX=3702 GN=RPL36C PE=3 SV=1	J	Translation, ribosomal structure and biogenesis	component of cytosolic 80S ribosome and 60S large subunit [Volvox carteri f. nagariensis]
c1045896.graph_c0	--	--	--	--	--	--	--	--	S	Function unknown	hypothetical protein SPPG_02080 [Spizellomyces punctatus DAOM BR117]
c1045916.graph_c0	[O]	Posttranslational modification, protein turnover, chaperones	Cellular Component: cytoplasmic part (GO:0044444);;	K03676|1.22157e-30|vra:106758605|K03676 glutaredoxin 3 | (RefSeq) glutaredoxin	[O]	Posttranslational modification, protein turnover, chaperones	Glutaredoxin	Glutaredoxin-C6 OS=Oryza sativa subsp. japonica OX=39947 GN=GRXC6 PE=1 SV=2	O	Posttranslational modification, protein turnover, chaperones	unknown [Lotus japonicus]
c1045919.graph_c0	--	--	Cellular Component: intracellular part (GO:0044424);;	K11599|1.43883e-09|csl:COCSUDRAFT_32660|K11599 proteasome maturation protein | (RefSeq) proteasome maturation factor UMP1	[O]	Posttranslational modification, protein turnover, chaperones	Proteasome maturation factor UMP1	--	O	Posttranslational modification, protein turnover, chaperones	proteasome maturation factor UMP1 [Hesseltinella vesiculosa]
c1045929.graph_c0	[J]	Translation, ribosomal structure and biogenesis	Molecular Function: binding (GO:0005488);; Biological Process: translational initiation (GO:0006413);; Cellular Component: intracellular ribonucleoprotein complex (GO:0030529);; Cellular Component: cytoplasmic part (GO:0044444);;	K03113|9.35132e-38|mus:103975581|K03113 translation initiation factor 1 | (RefSeq) protein translation factor SUI1 homolog	[J]	Translation, ribosomal structure and biogenesis	Translation initiation factor SUI1	Protein translation factor SUI1 homolog OS=Salix bakko OX=72444 PE=3 SV=1	J	Translation, ribosomal structure and biogenesis	probable translation initiation factor SUI1 [Ustilago hordei]
c1045989.graph_c0	[O]	Posttranslational modification, protein turnover, chaperones	Biological Process: protein peptidyl-prolyl isomerization (GO:0000413);; Molecular Function: peptidyl-prolyl cis-trans isomerase activity (GO:0003755);; Molecular Function: FK506 binding (GO:0005528);; Cellular Component: cytoplasm (GO:0005737);; Biological Process: chaperone-mediated protein folding (GO:0061077);;	K03773|9.72604e-52|olu:OSTLU_30671|K03773 FKBP-type peptidyl-prolyl cis-trans isomerase FklB [EC:5.2.1.8] | (RefSeq) FBP11-1; peptidyl-prolyl cis-trans isomerase, FKBP-type	[O]	Posttranslational modification, protein turnover, chaperones	FKBP-type peptidyl-prolyl cis-trans isomerase;; MYND finger;; Domain amino terminal to FKBP-type peptidyl-prolyl isomerase	Peptidyl-prolyl cis-trans isomerase FKBP62 OS=Arabidopsis thaliana OX=3702 GN=FKBP62 PE=1 SV=2	O	Posttranslational modification, protein turnover, chaperones	hypothetical protein CEUSTIGMA_g8423.t1 [Chlamydomonas eustigma]
c1046003.graph_c0	--	--	--	--	--	--	C2 domain	--	--	--	--
c1046020.graph_c0	[C]	Energy production and conversion	--	--	--	--	Polyketide cyclase / dehydrase and lipid transport	--	S	Function unknown	hypothetical protein CEUSTIGMA_g5454.t1 [Chlamydomonas eustigma]
c1046026.graph_c0	--	--	Molecular Function: protein transporter activity (GO:0008565);; Cellular Component: chloroplast thylakoid membrane (GO:0009535);; Biological Process: chloroplast organization (GO:0009658);; Cellular Component: chloroplast inner membrane (GO:0009706);; Biological Process: embryo development ending in seed dormancy (GO:0009793);; Biological Process: protein import into chloroplast stroma (GO:004503…	--	--	--	--	Protein TIC 100 OS=Arabidopsis thaliana OX=3702 GN=TIC100 PE=1 SV=1	S	Function unknown	PREDICTED: protein TIC 100 [Lupinus angustifolius]
c1046039.graph_c0	--	--	Molecular Function: ATP binding (GO:0005524);; Cellular Component: nucleus (GO:0005634);; Molecular Function: microtubule-severing ATPase activity (GO:0008568);; Biological Process: cytoplasmic microtubule organization (GO:0031122);;	--	--	--	--	--	O	Posttranslational modification, protein turnover, chaperones	hypothetical protein TSUD_38050 [Trifolium subterraneum]
c1046042.graph_c0	[R]	General function prediction only	Cellular Component: nucleus (GO:0005634);; Cellular Component: macromolecular complex (GO:0032991);; Cellular Component: intracellular non-membrane-bounded organelle (GO:0043232);; Cellular Component: intracellular organelle part (GO:0044446);;	K11806|4.96035e-122|ppp:PHYPADRAFT_199410|K11806 WD repeat and SOF domain-containing protein 1 | (RefSeq) hypothetical protein	[A]	RNA processing and modification	WD domain, G-beta repeat;; Sof1-like domain;; Anaphase-promoting complex subunit 4 WD40 domain	Notchless protein homolog OS=Arabidopsis thaliana OX=3702 GN=NLE1 PE=2 SV=1	S	Function unknown	predicted protein [Physcomitrella patens]
c1046054.graph_c0	--	--	--	--	--	--	60s Acidic ribosomal protein	--	J	Translation, ribosomal structure and biogenesis	--
c1046085.graph_c0	--	--	Biological Process: biological regulation (GO:0065007);;	--	[T]	Signal transduction mechanisms	RhoGEF domain;; PH domain;; PH domain	--	Z	Cytoskeleton	hypothetical protein BSLG_01626 [Batrachochytrium salamandrivorans]
c1046152.graph_c0	[C]	Energy production and conversion	Molecular Function: oxidoreductase activity (GO:0016491);;	K11352|3.03807e-09|pop:POPTR_0019s07820g|K11352 NADH dehydrogenase (ubiquinone) 1 alpha subcomplex subunit 12 | (RefSeq) hypothetical protein	[C]	Energy production and conversion	NADH ubiquinone oxidoreductase subunit NDUFA12	Probable NADH dehydrogenase [ubiquinone] 1 alpha subcomplex subunit 12 OS=Arabidopsis thaliana OX=3702 GN=At3g03100 PE=1 SV=1	S	Function unknown	NADH ubiquinone oxidoreductase subunit, putative [Pythium insidiosum]
c1046155.graph_c0	--	--	Cellular Component: ribosome (GO:0005840);; Biological Process: translation (GO:0006412);;	K02943|4.35219e-08|bdi:100839242|K02943 large subunit ribosomal protein LP2 | (RefSeq) 60S acidic ribosomal protein P2A-like	--	--	60s Acidic ribosomal protein	--	J	Translation, ribosomal structure and biogenesis	ribosomal protein 60S [Hesseltinella vesiculosa]
c1046192.graph_c0	[P]	Inorganic ion transport and metabolism	--	--	--	--	IucA / IucC family;; Ferric iron reductase FhuF-like transporter	--	Q	Secondary metabolites biosynthesis, transport and catabolism	--
c1046227.graph_c0	[J]	Translation, ribosomal structure and biogenesis	Cellular Component: intracellular (GO:0005622);;	K02915|6.57381e-31|gsl:Gasu_19110|K02915 large subunit ribosomal protein L34e | (RefSeq) 60S ribosomal protein L34e	[J]	Translation, ribosomal structure and biogenesis	Ribosomal protein L34e	60S ribosomal protein L34 OS=Nicotiana tabacum OX=4097 GN=RPL34 PE=2 SV=1	J	Translation, ribosomal structure and biogenesis	60S ribosomal protein L34-A [Ogataea parapolymorpha DL-1]
c1046261.graph_c1	--	--	--	--	[T]	Signal transduction mechanisms	EF hand;; EF hand;; EF-hand domain	Calcium-dependent protein kinase 12 OS=Oryza sativa subsp. japonica OX=39947 GN=CPK12 PE=2 SV=2	S	Function unknown	EF-hand [Punctularia strigosozonata HHB-11173 SS5]
c1046273.graph_c0	--	--	Cellular Component: intracellular ribonucleoprotein complex (GO:0030529);; Cellular Component: cytoplasmic part (GO:0044444);;	K02873|5.22631e-35|gra:105790543|K02873 large subunit ribosomal protein L13e | (RefSeq) 60S ribosomal protein L13-2	[J]	Translation, ribosomal structure and biogenesis	Ribosomal protein L13e	60S ribosomal protein L13-2 OS=Brassica napus OX=3708 PE=2 SV=1	J	Translation, ribosomal structure and biogenesis	hypothetical protein AXG93_891s1000 [Marchantia polymorpha subsp. ruderalis]
c1046273.graph_c1	--	--	Cellular Component: ribosome (GO:0005840);;	K02873|3.7028e-16|spen:107007668|K02873 large subunit ribosomal protein L13e | (RefSeq) 60S ribosomal protein L13-1	[J]	Translation, ribosomal structure and biogenesis	Ribosomal protein L13e	60S ribosomal protein L13-1 OS=Arabidopsis thaliana OX=3702 GN=RPL13B PE=1 SV=1	J	Translation, ribosomal structure and biogenesis	predicted protein [Hordeum vulgare subsp. vulgare]
c1046281.graph_c1	--	--	Biological Process: RNA metabolic process (GO:0016070);;	--	--	--	Rpp20 subunit of nuclear RNase MRP and P;; Alba	--	J	Translation, ribosomal structure and biogenesis	hypothetical protein BCR32DRAFT_289543 [Anaeromyces robustus]
c1046315.graph_c0	[J]	Translation, ribosomal structure and biogenesis	Biological Process: maturation of LSU-rRNA (GO:0000470);; Molecular Function: RNA binding (GO:0003723);; Biological Process: translation (GO:0006412);; Cellular Component: cytosolic large ribosomal subunit (GO:0022625);;	K02936|7.01188e-77|ppp:PHYPADRAFT_105479|K02936 large subunit ribosomal protein L7Ae | (RefSeq) hypothetical protein	[J]	Translation, ribosomal structure and biogenesis	Ribosomal protein L7Ae/L30e/S12e/Gadd45 family	60S ribosomal protein L7a-2 OS=Arabidopsis thaliana OX=3702 GN=RPL7AB PE=2 SV=1	J	Translation, ribosomal structure and biogenesis	conserved unknown protein [Ectocarpus siliculosus]
c1046349.graph_c0	[J]	Translation, ribosomal structure and biogenesis	Biological Process: cleavage involved in rRNA processing (GO:0000469);; Biological Process: maturation of LSU-rRNA (GO:0000470);; Biological Process: translation (GO:0006412);; Cellular Component: cytosolic large ribosomal subunit (GO:0022625);; Biological Process: rRNA pseudouridine synthesis (GO:0031118);; Biological Process: snRNA pseudouridine synthesis (GO:0031120);; Cellular Component: box …	K11129|1.76592e-42|vcn:VOLCADRAFT_35939|K11129 H/ACA ribonucleoprotein complex subunit 2 | (RefSeq) hypothetical protein	[A]	RNA processing and modification	Ribosomal protein L7Ae/L30e/S12e/Gadd45 family	H/ACA ribonucleoprotein complex subunit 2-like protein OS=Arabidopsis thaliana OX=3702 GN=At5g08180 PE=1 SV=1	J	Translation, ribosomal structure and biogenesis	box H/ACA snoRNP component Nhp2p [Guillardia theta CCMP2712]
c1046359.graph_c2	[I]	Lipid transport and metabolism	Biological Process: single-organism metabolic process (GO:0044710);;	K04713|1.59587e-30|sind:105159960|K04713 sphinganine C4-monooxygenase [EC:1.14.18.5] | (RefSeq) sphinganine C(4)-monooxygenase 1-like	[I]	Lipid transport and metabolism	Fatty acid hydroxylase superfamily	Sphinganine C4-monooxygenase 2 OS=Arabidopsis thaliana OX=3702 GN=SBH2 PE=1 SV=1	I	Lipid transport and metabolism	hypothetical protein KNAG_0B04760 [Kazachstania naganishii CBS 8797]
c1046398.graph_c0	--	--	--	--	--	--	Protein phosphatase inhibitor 2 (IPP-2)	--	S	Function unknown	protein phosphatase inhibitor ipp2 [Plasmopara halstedii]
c1046467.graph_c0	--	--	Cellular Component: incipient cellular bud site (GO:0000131);; Cellular Component: 1,3-beta-D-glucan synthase complex (GO:0000148);; Molecular Function: GTPase activity (GO:0003924);; Molecular Function: GTP binding (GO:0005525);; Cellular Component: peroxisome (GO:0005777);; Cellular Component: Golgi apparatus (GO:0005794);; Cellular Component: cellular bud tip (GO:0005934);; Cellular Component:…	K04392|9.92337e-53|gsl:Gasu_25940|K04392 Ras-related C3 botulinum toxin substrate 1 | (RefSeq) cell division control protein 42	[R]	General function prediction only	Ras family;; Ras of Complex, Roc, domain of DAPkinase;; ADP-ribosylation factor family	Rac-like GTP-binding protein ARAC2 OS=Arabidopsis thaliana OX=3702 GN=ARAC2 PE=1 SV=1	S	Function unknown	Rho GTPase rho1 [Pseudomassariella vexata]
c1046469.graph_c0	--	--	Cellular Component: ribosome (GO:0005840);;	K02975|4.97086e-30|egr:104430704|K02975 small subunit ribosomal protein S25e | (RefSeq) 40S ribosomal protein S25-2	[J]	Translation, ribosomal structure and biogenesis	S25 ribosomal protein	40S ribosomal protein S25-2 OS=Arabidopsis thaliana OX=3702 GN=RPS25B PE=3 SV=1	J	Translation, ribosomal structure and biogenesis	ribosomal protein S25, partial [Rhizoclosmatium globosum]
c1046512.graph_c1	--	--	--	--	--	--	Domain of unknown function (DUF1772)	--	S	Function unknown	--
c1046528.graph_c0	--	--	--	--	[Z]	Cytoskeleton	Cofilin/tropomyosin-type actin-binding protein	--	S	Function unknown	hypothetical protein M378DRAFT_162061 [Amanita muscaria Koide BX008]
c1046588.graph_c0	[R]	General function prediction only	--	--	[BK]	--	SET domain	Putative histone-lysine N-methyltransferase ASHH4 OS=Arabidopsis thaliana OX=3702 GN=ASHH4 PE=3 SV=1	S	Function unknown	hypothetical protein SPPG_01685 [Spizellomyces punctatus DAOM BR117]
c1046612.graph_c1	[J]	Translation, ribosomal structure and biogenesis	Molecular Function: nucleic acid binding (GO:0003676);;	--	[R]	General function prediction only	RNA recognition motif. (a.k.a. RRM, RBD, or RNP domain)	Small RNA-binding protein 11, chloroplastic OS=Arabidopsis thaliana OX=3702 GN=S-RBP11 PE=2 SV=1	S	Function unknown	BQ2448_4856 [Microbotryum intermedium]
c1046626.graph_c0	--	--	--	--	[TZ]	--	Formin Homology 2 Domain	Formin-like protein 16 OS=Arabidopsis thaliana OX=3702 GN=FH16 PE=3 SV=2	S	Function unknown	FH2-domain-containing protein [Mortierella elongata AG-77]
c1046653.graph_c0	--	--	Molecular Function: protein serine/threonine kinase activity (GO:0004674);; Molecular Function: ATP binding (GO:0005524);; Cellular Component: nucleus (GO:0005634);; Cellular Component: cytoplasm (GO:0005737);; Biological Process: endocytosis (GO:0006897);; Biological Process: regulation of cell shape (GO:0008360);; Biological Process: Wnt signaling pathway (GO:0016055);; Biological Process: pept…	K02218|4.51619e-71|ppp:PHYPADRAFT_141762|K02218 casein kinase 1 [EC:2.7.11.1] | (RefSeq) hypothetical protein	[T]	Signal transduction mechanisms	--	Casein kinase 1 OS=Oryza sativa subsp. japonica OX=39947 GN=CKI1 PE=1 SV=1	T	Signal transduction mechanisms	CK1/CK1/CK1-D protein kinase [Phytophthora parasitica INRA-310]
c1046733.graph_c0	--	--	--	--	[R]	General function prediction only	Calcium-dependent channel, 7TM region, putative phosphate;; Late exocytosis, associated with Golgi transport;; Cytosolic domain of 10TM putative phosphate transporter	CSC1-like protein At4g02900 OS=Arabidopsis thaliana OX=3702 GN=At4g02900 PE=3 SV=1	S	Function unknown	DUF221-domain-containing protein [Basidiobolus meristosporus CBS 931.73]
[truncated: 36,314 more rows]

## Sheet: Table S8
Tbale S8 GO annotation of unigenes
#GO_Function	Unigene_number	Unigene_ID
Biological Process	33466
Biological Process: 'de novo' AMP biosynthetic process (GO:0044208);	4	c1259617.graph_c0;c1250634.graph_c0;c1244412.graph_c0;c1242580.graph_c0
[truncated: 5,787 more rows]

## Sheet: Table S9
Table S9 KEGG pathway annotations of unigenes
[truncated: 132 more rows]

[truncated: 4 more sheets: Table S10, Table S11, Table S12, Table S13]
